# Supplementary material for: Design of a self-driven probiotic-CRISPR/Cas9 nanosystem for sono-immunometabolic cancer therapy
Source: PubMed Central journal article supplement (PMC9780327; doi:10.1038/s41467-022-35580-z), 2022-12-22
Supplement: 41467_2022_35580_MOESM2_ESM.pdf [file 41467_2022_35580_MOESM2_ESM.pdf]

### Design of a self-driven probiotic-CRISPR/Cas9 nanosystem for sono-immunometabolic cancer therapy

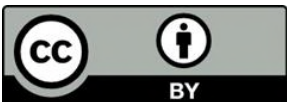

**Open Access** This file is licensed under a Creative Commons Attribution 4.0 International License, which permits use, sharing, adaptation, distribution and reproduction in any medium or format, as long as you give appropriate credit to the original author(s) and the source, provide a link to the Creative Commons license, and indicate if changes were made. In the cases where the authors are anonymous, such as is the case for the reports of anonymous peer reviewers, author attribution should be to 'Anonymous Referee' followed by a clear attribution to the source work. The images or other third party material in this file are included in the article's Creative Commons license, unless indicated otherwise in a credit line to the material. If material is not included in the article's Creative Commons license and your intended use is not permitted by statutory regulation or exceeds the permitted use, you will need to obtain permission directly from the copyright holder. To view a copy of this license, visit <http://creativecommons.org/licenses/by/4.0/>.

## REVIEWER COMMENTS

Reviewer #1 (Remarks to the Author): with expertise in bacteria engineering / cancer therapy

The manuscript presents a multimodal approach to reprogram tumor immunosuppressive microenvironment to improve immunotherapy efficacy. The authors had combined several technologies including tumor-colonizing bacteria, CRISPR system, and ultrasound irradiations to alter tumor microenvironment. While there has been increasing report using these systems individually to alter tumor immune microenvironment, combination of all technologies is novel. This system was tested in vitro under various conditions, and was shown to have significant efficacy in breast cancer animal models. While the study shows interesting combinations of multiple technologies to enhance cancer therapy efficacy, contributions from individual components as well as the rationale of the combinations were not clear. Furthermore, there remain key questions to be answered such as the inclusion of appropriate experimental controls, biological replicates, and statistical analysis to support claims in the manuscript.

The authors claim multiple mechanisms of their therapy contributing to the efficacy. However, individual contributions from each component and rationale for their combination are not clear. For example, there seems to be two mechanisms in which US works with this approach. On one hand the authors claims that the generation of ROS kills the tumor cells which shows apoptosis of most cells when treated in vitro. On the other hand, the authors also argue that US triggers release of CRISPR complex from the lysosomal compartments. It is not clear how CRISPR system can contribute to this therapy if the tumor cells are killed anyways. Deaths of the cells can simply result in the reduction of IDO levels. The mechanisms in which conjugated MHS gets released from LGG and get into cancer cells are also unclear. Another contradiction is the delivery of the MHS. It was not clear how MHS was delivered. Since authors showed MHS do not accumulate in tumors after systemic injections, how come MHS+US show strong efficacy?

Many important information such as controls is missing which makes it difficult to properly evaluate the data. First, several important data is missing biological replicates. For example, data supporting the CRISPR-mediated gene editing only shows single replicate or just the genetic sequence. The biodistribution of LGG in vivo were shown with single agar plate per group, but there are no quantifications or biological replicates. In Fig. S14, it seems like the bacteria level is decreasing from 24 to 72hrs in both liver and tumors, which is different from what the authors had claimed in the manuscript. Since the use of LGG for tumor targeting is new, this approach warrants more careful characterizations. Second, there are lack of description regarding the statistical analyses performed and some interpretations of the data are questionable. In Fig. 6, the figure caption describes the statistical test as t-test, but these data include multiple groups and timepoints which cannot be analyzed with the t-test. Third, some key controls are missing from several experiments. For example, the authors included some combination of their systems to compare their efficacy, but LGG+US is missing from the experimental groups. Is it possible that LGG+US is just as effective as LGG-MHS+UG? Lastly, some details on experimental settings are missing which makes it difficult to properly assess what was done. In the animal experiments, it is not clear how the treatment was performed. How were LGG-MHS administered and how many times? If the LGG-MHS was administered systemically, did they also get to the distal tumors in Fig. 8 experiments? The possibility of LGG-MHS colonization and its effect on distal tumors needs to be excluded before the authors claim the contribution of systemic immunity.

Overall, while the amount of data presented in the manuscript is impressive, the above points need to be addressed to properly assess the claims of the study.

Other points:

- There seems to be several typo, missing figure reference, and mislabeling that should be corrected
- Reference #30 do not include studies supporting LGG colonization in tumors
- Reference #31 did not show LGG tumor colonization and local remodeling of the microenvironment
- Line 132-134 is misleading. Fig. S3 shows some residual RNA by 3 hours. Where are the

replicates?

- Line 135-137: Is pH5 relevant to tumor microenvironment? How does this release relate in the in vivo conditions, since the CRISPR complexes needs to be delivered to intracellular regions? If it is released prematurely in the tumor microenvironment, doesn't this reduce the efficacy?
- Fig. 3d label should be edited. It isn't showing % viability
- Line 224-226: where is the data supporting this claim?
- Fig. 4f and g: why did the authors just decided to look into IL-12p70 and IL-2 among all other cytokines?
- Fig. 5a and c: Are LGG and MHS both labeled with Cy5? If so, shouldn't one expect much higher signal from LGG-MHS compared to LGG alone? It looks like they are at similar levels, possibly suggesting that MHS is not getting to tumors
- Since the authors had claimed the ability for MHS to remodel immunometabolism, RNA sequencing result on LGG-MHS may be helpful to decipher the contribution on TME remodeling from LGG alone vs LGG-MHS.
- Fig. S17: where are the data showing bacteria levels in tumors? This should also be quantified with biological replicates.
- Fig. S19 and S20: I don't see the control groups as claimed in the main text. The values seem to change over time – what statistics did the authors use to get the non-significance?
- Fig. 6: The authors indicated day 7, 9, 11, and 13 as treatment days. Is this LGG-MHS injections? Or is it US treatment? How are LGG-MHS administered?
- Fig. 8a: The inoculation of secondary tumors at mammary pad isn't strictly metastatic model. I suggest editing the main text

Reviewer #2 (Remarks to the Author): with expertise in cancer immunology, IDO

The manuscript by Yu et al describes use of a microbial vector (lactobacillus, LGG) and nanoparticle delivery system (MHS) activated by ultrasound (US) irradiation to target and manipulate the tumour microenvironment (TME). The authors used this approach to boost anti-tumour immunity in two ways by; (1) stimulating reactive oxygen species (ROS) production following US and (2) using LGG to deliver CRISPR/Cas9 gene editing functions to excise indoleamine 2,3 dioxygenase-1 (IDO1) genes, which mediate immune suppression via IDO enzyme activity. TME-targeting efficacy was evaluated in a murine breast cancer cell line (4T1) and the 4T1/BALB/c tumour model. Data reported largely support the authors' claims that the LGG/MHS delivery system is an effective method to incite protective anti-tumour immunity. The manuscript is generally well-written but would benefit from increased clarity and focus on key biological findings of potential clinical significance, and reduced emphasis on technical information such as nanoparticle synthesis and validation data (see below).

Major Points:

1. The Abstract does not clearly convey major findings from the study and would benefit from extensive rewriting to enhance clarity, emphasise significant findings and minimise technical information. In particular, more emphasis should be placed on describing outcomes from experiments conducted using the mouse tumour model, as these data are far more informative than studies performed on cell lines regarding future prospects for clinical translation of the results from this study.
2. The initial description of the nanoparticle delivery system in the Introduction is confusing (lines 86-103). In particular, the meaning of the acronym MHS needs clarifying, as does the purpose of using ZIF8 and HHME in the strategy used in this study. The graphic depicting study goals (Fig. 1) helps but is far too complicated. This graphic should be simplified to focus exclusively on key elements of the strategy employed in the study; in other words, make it into a graphic hypothesis.
3. The authors do not justify their choice of the 4T1 tumour model. Most importantly, is the 4T1 model dependent on IDO activity for optimal 4T1 tumour growth? If not, this undermines the strategy used and prompts the use of a tumour model known to be dependent on IDO for optimal growth (eg. the LLC tumour model). Linked to this key point, what is the authors' rationale for administering treatments when 4T1 tumours were 200mm<sup>3</sup>?
4. The authors must assess IDO enzyme activity by measuring kynurenine levels in the TME and

draining lymph nodes to evaluate if their treatment strategy reduces nominal levels of IDO enzyme activity that may promote immune suppression required for optimal tumour growth. Note that assessing (1) IDO1 protein expression or (2) Trp levels are not sufficient to measure IDO activity in the TME. Linked to this point, the authors should test if IDO inhibitors synergise with their nanoparticle approach to boost immune activation to assess if IDO inhibitors or LGG-CRISPR/cas9 gene editing is more effective in reducing IDO activity.

5. Data reported in Fig6 & Fig8 support the authors' conclusion that LGG-MHS+US treatments reduced primary and distal 4T1 tumour burdens at experimental endpoints (day 21). MHS+US treatments also reduced tumour burdens, though to a lesser extent. These outcomes suggest that combining LGG with MHS/US nanotherapy may fully protect against 4T1 tumour growth but more studies will be necessary to support this claim rigorously, in particular with regard to if IDO1 gene editing is critical to promote protective outcomes (see point 4). Accordingly, the authors should assess mouse survival over longer periods and test if LGG infection or IDO1 gene editing (or both) contribute to increased protection from 4T1 tumour growth, as well as evaluating IDO enzyme activity (see point 4).

6. The tumour re-challenge strategy depicted in Fig8h indicates that primary 4T1 tumours were surgically resected on day 21. It is not clear why tumours were resected. Tumour re-challenge should be conducted by injecting 4T1 tumour cells into mice that survive primary 4T1 tumour growth after therapy without resecting primary tumours prior to re-challenge to evaluate if therapy stimulates durable and stable anti-tumour immunity that clears both primary and secondary tumours.

7. The short Discussion (lines 513 – 525) does not adequately describe the relevance and significance of the study findings, or place them in the context of the current scientific literature. This section needs extensive rewriting to address these deficiencies.

#### Minor Point:

1. The large number of supplemental figures (33) make the manuscript difficult to read. The authors should consult with the editors to find ways to streamline this large set of supplemental figures.

#### Reviewer #3 (Remarks to the Author): with expertise in nanotechnology

The paper entitled “Self-driven Probiotic-CRISPR/Cas9 Nanosystem Reprogramming of Tumor Immunosuppressive Microenvironment to Enable Sono-immunometabolic Cancer Therapy” is reporting the use of a multifunctional immunotherapeutic system for solid tumor treatment. They loaded the sonosensitizer hematoporphyrin monomethyl ether (HMME) and CRISPR/CAS9 on ZIF-8 (MHS) and combined them with *Lactobacillus rhamnosus* GG (LGG) for enhancing immunotherapy efficacy. LGG bacteria was used as a carrier for in vivo study to increase the targetability of the system toward tumors. The system consisted of ZIF-8 which was used as a vector to protect Cas9/sgRNA, HMME was used to generate ROS under ultrasound irradiation (US) to induce lysosomal rupture and release Cas9/sgRNA which is intended to knock down the IDO1 gene and promote immunogenic cell death (ICD). They tested the efficacy of the system in both, in vitro and in vivo. It is evident that they tried to evaluate the efficiency of their system using different experimental approaches. While the in vivo results looked promising, they did not provide a clear conclusion about the advantage of each individual component of the system and its role in the success of the treatment. They lack many control experiments which made the data presented inexplicit. Therefore, acceptance can be recommended at this stage. The following comments need to be addressed to have a better understanding of their system.

1. For the construct assembly, it was not clear how HMME was loaded into ZIF-8. What type of interaction is happening? The same for Cas9/sgRNA, did it infiltrate ZIF-8 or did they form a complex?
2. The illustration and the terms “loading” and “encapsulation” are not very accurate. The author claimed the loading/ encapsulation of Cas9/sgRNA into ZIF-8, however, the reported pore size of ZIF-8 is very small for Cas9/sgRNA to internalize.
3. In figure 2C, how did ZIF-8 maintain its hexagonal structure after combining it with HMME and CRISPR/CAS9? and the size increase after complexation has to be justified.



4. The elemental mapping (EM) in figure 2i does not correspond to the TEM image of LGG-MHS in 2h. It is better to compare it to the elemental mapping of LGG alone and compare the EM of MHS to ZIF-8 alone using the same experimental settings.
5. In line 120, they mentioned "utilizing sodium dodecyl sulfate-polyacrylamide gel electrophoresis (SDS-PAGE)", however, figure S1 shows an agarose gel of the sgRNA only. Therefore, they need to show the loading of the different mass ratios of MH to Cas9 used in order to obtain the optimal loading concentration.
6. Figure S3, the MHS stability experiment has to be conducted after 12, 24hrs, since the system is incubated with the cells for 24 hrs. Also, running the same experiment on SDS PAGE with free Cas9/sgRNA would show the stability of Cas9 as well.
7. Figure 3a, the group measured the generated ROS after exposing MHS to US, but they did not report the effect of US radiation on ZIF-8 alone and MH, and hence, the reason for adding HMME would be justified.
8. In Figure S7, the author claims that Cy5.5-labeled Cas9/sgRNA system entered the nucleus, however, the Cy5 signal seems to follow the pattern of the lysotracker. In addition, the nucleus does not look intact. Z-stack is needed to show localization in the nucleus.
9. In the cytotoxicity experiment (Figure 3d), if the role of gene silencing is to improve the immune system mediated killing of the cells, why do we see improved efficacy when no immune cells are present in the model? Why is the toxicity MHS+US significantly higher than the MH+US system. Similar observation was seen with Fig.3e & S8 between MH+US and MHS+US group. Why the presence of Cas9/sgRNA increased the apoptosis in 4T1 cells?
10. In Figure 3h, the 12% difference in cleavage between the two groups is not reflected in agarose gel. Also, NGS and the Deep sequencing data for MHS only were not provided.
11. In figure 3f, in the MHS+US group, the reduced signal might be due to the cells being out of focus compared to the others. We suggest using the nucleus as a point of focus to make it easier to visualize and compare.
12. In fig. S9, the expression of IDO1 seems to be lower in the case of MHS compared to MHS+US which contradict the gene deletion rates mentioned in line 205 and 206.
13. In the experiment "In vitro exploration of ultrasonic-immunometabolic therapy" line 236-237, the correlation or the mechanism by which MHS + US triggered the ICD is not clear since some groups showed similar trends in the case of protein expression Ex. MHS group had similar protein expression for CRT and HSP70 to MHS +US group (Figure 4a).
14. In figure 5, was RNAseq-based KEGG analysis of differential gene expression profiles conducted for LGG-MHS+US treatment only? Again there are many controls missing
15. The biosafety of the LGG-MHS nanosystem on different organs was evaluated without applying the US which is the main activator of the system. It would be more reflective to show that after applying US.
16. For all in vivo experiments with LGG+MHS+US, a main control is missing. The role of gene knockdown of Cas9/gRNA will not be conveyed clearly if LGG-MH+US is not tested.
17. There are many grammatical mistakes that need to be corrected. Ex. Line 75 "is" not needed, line 77 "barrier", line 78 "it maintains", line 166 it improves" gene delivery, line 333 repetition of "that", figure 5e. "kidney".

Reviewer #4 (Remarks to the Author): with expertise in bacteria cancer therapy; nanotechnology

In this manuscript, the authors reported the synthesis of ZIF-8 for tumor targeted delivery of sonosensitizer HMME and CRISPR/Cas9 system by employing the intrinsic tumor hypoxia targeting ability of LGG. By downregulating the expression of IDO1, the obtained composites were shown to be able to effectively suppress tumor growth via the combined sonodynamic treatment and tumor immunosuppression reversion. However, similar topics have been widely reported in the past several years and this study did not provide enough attractive new results.

Specific comments:

1. Attributing to the intrinsic targeting ability of LGG, it is believed that HMME and CRISPR/Cas9 system loaded within the ZIF-8 nanoparticles would be primarily delivered to the hypoxic tumor

region. Therefore, I want to know if the hypoxic condition would diminish the sonosensitization efficacy of HMME under US exposure.

2. Actually, diverse small molecule IDO1 inhibitors have been developed to reverse tumor immunosuppression by restricting the production of Kyn. Therefore, I would like to suggest the authors to describe the advantages of the presented strategies.

3. Based on the results shown in Figure 2, the pore size of the obtained MH and MHS nanoparticles with typical ZIF-8 morphology is very small. Therefore, I want to know how CRISPR/Cas9 systems were loaded. Besides, would the loading process negatively impair the biological activity of loaded CRISPR/Cas9 system? Did the US irradiation promoted generation of ROS negatively the biological activity of CRISPR/Cas9 systems.

4. The authors are suggested to describe the methods used for the loading of MHS nanoparticle onto the surfaced of LGG. Besides, Did the MHS nanoparticles loading impact the colonization behaviors of LGG.

5. In Figure 3e, it was shown that the flow cytometric plot of MHS and US treated cells was distinct from the typical apoptotic cancer cells. Please double check. Maybe the combination treatment could not induce apoptosis since it has been well documented that apoptosis of cancer cells is not the immunogenic cell death because it could not promote the expression of CRT, release of HMGB1.

6. The authors are suggested to explain why the treatment of MHS plus US was more efficient than the treatment of MH plus US in promoting the immunogenic cell death of 4T1 cancer cells. Besides, the authors are suggested to explain the mechanism of such combination treatment in promoting the expression of HSP70.

7. In figure 4h, the flow cytometric patter of these maturated BMDCs is quite different from those published ones. Please double check.

8. In Figure 7c and S25, the gating strategy used for analyzing the percentages of CD4+Foxp3+ Tregs was not correct. Please reanalyze the results. Besides, it seems that the gate strategies shown in Figure S25 were not the standard ones.

9. The font size of Figure 6b was too small. Please reformat the figure.

## Response to reviewer #1

1  
2 *1. The manuscript presents a multimodal approach to reprogram tumor*  
3 *immunosuppressive microenvironment to improve immunotherapy efficacy. The*  
4 *authors had combined several technologies including tumor-colonizing bacteria,*  
5 *CRISPR system, and ultrasound irradiations to alter tumor microenvironment. While*  
6 *there has been increasing report using these systems individually to alter tumor*  
7 *immune microenvironment, combination of all technologies is novel. This system was*  
8 *tested in vitro under various conditions, and was shown to have significant efficacy in*  
9 *breast cancer animal models. While the study shows interesting combinations of*  
10 *multiple technologies to enhance cancer therapy efficacy, contributions from*  
11 *individual components as well as the rationale of the combinations were not clear.*

12 **Response:** We appreciate very much for your constructive comments and kind  
13 recommendations. The manuscript and supplementary data have been revised  
14 accordingly. The LGG-MHS nanosystem is mainly composed of two parts, namely  
15 LGG and MHS. And then the MHS is composed of three components, M (metal  
16 organic framework, ZIF-8), H (sonosensitizer, HMME) and S (Cas9/sgRNA). The  
17 contributions and rationality of individual components are herein clarified as follows:

18 (1) LGG: *Lactobacillus rhamnosus* GG (LGG) is a parthenogenic anaerobic probiotic  
19 that, in our strategy, acts as a carrier for targeted delivery of the whole nanosystem to  
20 the tumor site, and can also serve as a synergistic therapeutic adjuvant for immune  
21 activation.

22 First, LGG serves as a delivery vehicle in the LGG-MHS nanosystem. The tumor  
23 microenvironment is closely associated with heterogeneous tumor growth, metastasis,  
24 and treatment resistance<sup>1-3</sup>. Currently, the strategies to target the hypoxic  
25 microenvironment of tumor are mainly categorized into exploiting hypoxia and  
26 alleviating hypoxia. Compared to previous therapeutic strategies to alleviate hypoxia,  
27 tumor-specific targeting is achieved by exploiting the characteristics of the tumor

28 hypoxic microenvironment, thus further improving the efficiency of drug delivery<sup>4, 5</sup>.  
29 Interestingly, it has been found in many studies that parthenogenic and specialized  
30 anaerobic bacteria can selectively target tumors and partially colonize the tumor  
31 region as the tumor establishes anaerobic conditions, provides abundant nutrients and  
32 protects them from immune clearance<sup>6-10</sup>.

33 In our study, we found that LGG has an excellent ability to target the hypoxic  
34 microenvironment of tumors. *In vivo* fluorescence images and semi-quantitative  
35 analysis indicate that the fluorescent intensity of Cy5.5 at the tumor site increased  
36 over time 24 h after intravenous injection of LGG-Cy5.5 and LGG-MHS-Cy5.5,  
37 revealing superior tumor targeting properties of the LGG-MHS complex. Notably, the  
38 CFU of LGG in the tumor was significantly higher than that in the liver at the 72 h  
39 time point, and LGG in the tumor accumulated and was maintained for more than 72  
40 hours, which further supports the superior tumor targeting and penetration ability of  
41 LGG (Line 322-333, Page 10-11, Revised Manuscript).

42 Secondly, LGG serves as a synergistic therapeutic adjuvant. It has been found  
43 that bacteria can be used as an immunotherapeutic adjuvant due to its unique immune  
44 activating effects<sup>11-13</sup>. Bacterial infection in tumors can lead to antitumor responses by  
45 inducing the migration of innate immune cells such as DCs, neutrophils, macrophages  
46 and neutrophils into colonized tumors and by enhancing the abundant expression of  
47 tumor necrosis inflammatory cytokines, thus killing tumor cells and preventing  
48 metastasis formation<sup>14-16</sup>. LGG has also been suggested to modulate the inflammatory  
49 state during cancer development and transformation<sup>17, 18</sup>. We then hypothesized that  
50 *Lactobacillus rhamnosus*, a parthenogenic anaerobic (*Lactobacillus* spp.), also  
51 possesses the ability to activate immunity to fight against tumor. Subsequently, we  
52 sequenced the tumor-bearing mice injected with LGG alone, the results showed that  
53 LGG stimulated multiple pro-inflammatory and anti-tumor signaling pathways in  
54 mice. Analysis of these differential genes using gene ontology (GO) and Kyoto  
55 Encyclopedia of Genes and Genomes (KEGG) reveals that they are associated with  
56 multiple signaling pathways, including immune infiltration of the tumor

57 microenvironment and promotion of tumor cell apoptosis. In summary, LGG may  
58 possess the ability to enhance the effect of immunotherapy for tumor. (Line290-293,  
59 **Page 9, Revised Manuscript**)

60 (2) MHS: The MHS is composed of three components, M (metal organic framework,  
61 ZIF-8), H (sonosensitizer, HMME) and S (Cas9/sgRNA). ZIF-8 delivers Cas9/sgRNA  
62 and HMME to the tumor site, and upon entry into the cell, HMME generates ROS  
63 upon US irradiation, inducing the release of tumor-associated antigens and  
64 immunogenic cell death of tumor cells, leading to DCs maturation. In addition, ROS  
65 effectively disrupts the structure of the endosomal/lysosomal membrane, allowing  
66 Cas9/sgRNA to escape from the endosome/lysosome and transport to the nucleus for  
67 effective *IDO1* knockdown, thereby reducing Treg cells aggregation in the tumor  
68 microenvironment.

69 Zeolitic imidazolinium framework (ZIF-8) is a metal-organic framework with a  
70 large specific surface area, tailored pore size, pre-designed morphology,  
71 biocompatibility and controlled degradability that brings such materials closer to  
72 pharmaceutical and medical translation, allowing them to be used as an excellent non-  
73 viral CRISPR/Cas9 delivery system<sup>19-22</sup>. HMME and Cas9/sgRNA are delivered into  
74 tumor cells *via* ZIF-8, and Cas9/sgRNA rapidly escapes from endosomes/lysosomes  
75 *via* the proton-sponge effect, thus enabling effective gene editing<sup>23, 24</sup>.

76 In this synergistic immunotherapy strategy, HMME was used as sonosensitizer to  
77 generate abundant ROS to damage tumor cells upon US irradiation, while the  
78 generated ROS induce endosomal/lysosomal rupture to release Cas9/sgRNA, setting  
79 the stage for its next step of gene editing. HMME, an organic acoustic sensitizer,  
80 which can lead to higher ROS level and therefore produces more adequate SDT  
81 efficiency compared to inorganic acoustic sensitizers<sup>25-27</sup>. More importantly, HMME  
82 has been approved by the FDA for clinical use because of its high safety profile as an  
83 sonsensitizer<sup>28</sup>.

84 Indoleamine-2,3-dioxygenase-1 (*IDO1*) is an endogenous immunosuppressive  
85 mediator that can stimulate the accumulation of FOXP3<sup>+</sup> Tregs and suppresses T-cell  
86 activity by depleting Trp in the microenvironment<sup>29, 30</sup>. Thus, *IDO1* is a potential  
87 immunotherapeutic target to reprogram TIME by improving amino acid metabolism<sup>31</sup>.  
88 Nevertheless, small molecule inhibitors generally do not provide durable responses  
89 due to the presence of drug resistance<sup>32, 33</sup>. Therefore, there is an urgent need for  
90 alternative approaches to interfere with amino acid metabolism to reprogram the  
91 TIME of cancer immunotherapy.

92 CRISPR/Cas9, as an emerging genome editing technology, has the advantages of  
93 simple design, high specificity and high efficiency, which bringing a breakthrough in  
94 the regulation and application of targeted genome modification and showing broad  
95 application prospects in biomedicine<sup>34</sup>. In this strategy, after MHS entered into tumor  
96 cells, Cas9/sgRNA escapes from the endosome/lysosome under irradiation of US and  
97 is translocated to the nucleus for efficient *IDO1* knockdown, thereby reducing the  
98 aggregation of Treg cells in the TIME.

99

100 *2. Furthermore, there remain key questions to be answered such as the inclusion of*  
101 *appropriate experimental controls, biological replicates, and statistical analysis to*  
102 *support claims in the manuscript.*

103 **Response:** Thank you for your kind reminder, which is essential to improve the  
104 quality of our research. According to the reviewer's suggestion, experimental controls  
105 such as LGG-MH + US and LGG-MHI + US groups in animal models have been  
106 added. Mice were randomly divided into 8 groups, including Control, LGG, MHS,  
107 LGG-MHS, MHS + US, LGG-MH + US, LGG-MHI + US and LGG-MHS + US. As  
108 a result, the LGG-MHS + US group showed excellent ability to inhibit tumor growth  
109 compared to the other groups. The related data have been added in the Revised  
110 Manuscript. (Figure 6, Page 38, Revised Manuscript).

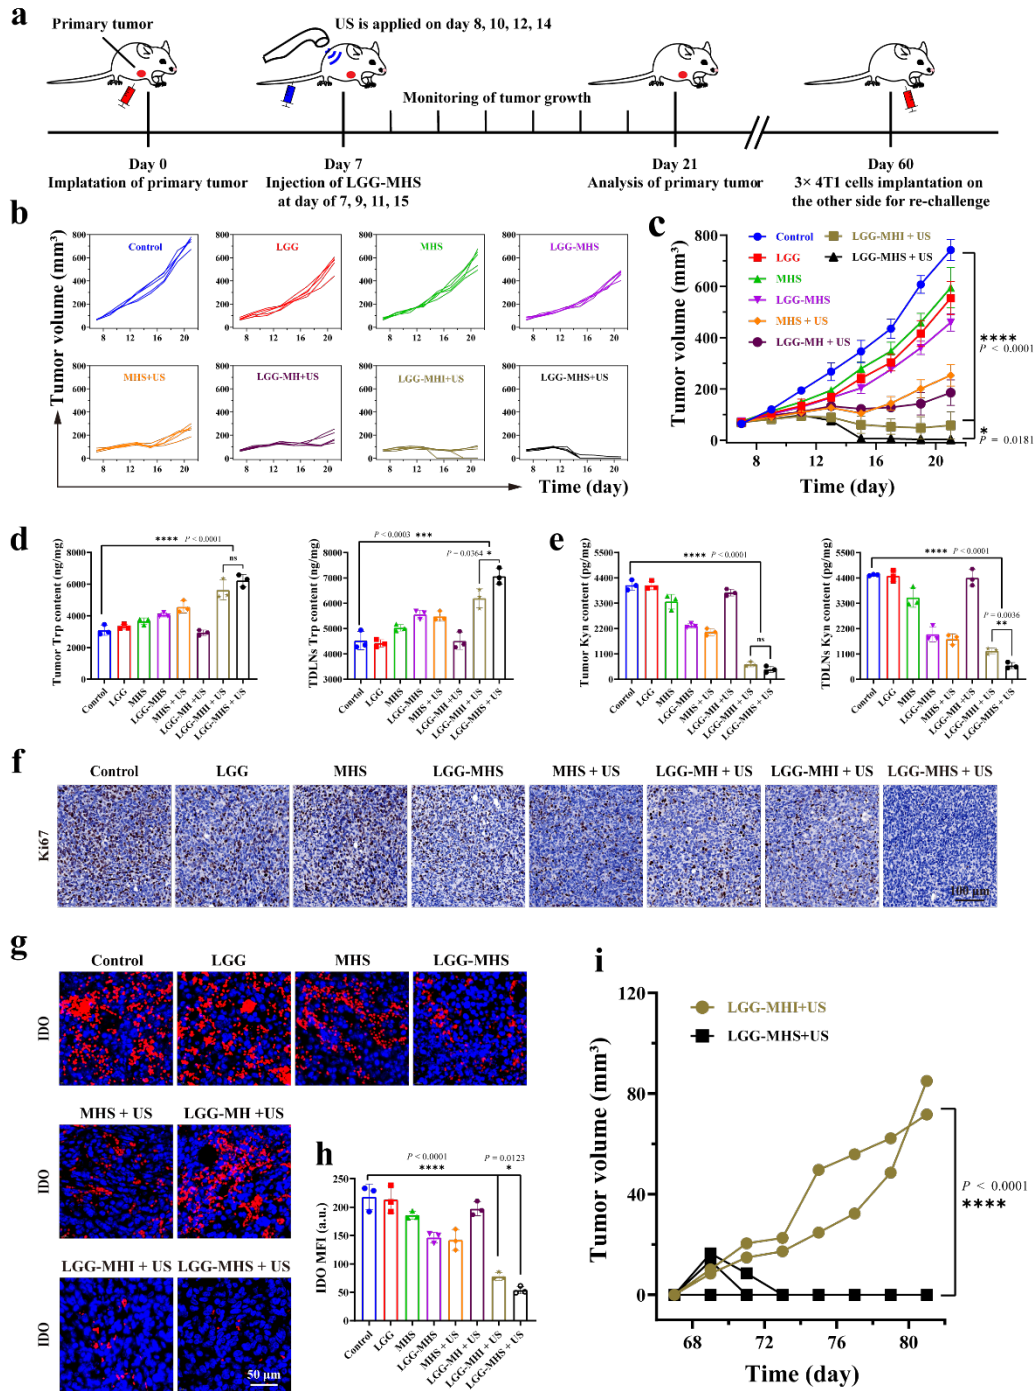

111

112 **Fig. 6 LGG-MHS + US against 4T1 tumor *in vivo*.** (a) Schematic diagram of primary tumor  
 113 treatment process *in vivo*. (b) Tumor growth curves of 4T1 after being treated by PBS, LGG, MHS,  
 114 LGG-MHS, MHS + US, LGG-MH + US, LGG-MHI + US and LGG-MHS + US ( $n = 5$ ). (c)  
 115 Average tumor growth curves in different groups ( $n = 5$ ). (d) HPLC assay of the Trp content in  
 116 primary tumors and TDLNs of tumor-bearing mice after different treatments ( $n = 3$ ). (e) Elisa  
 117 assay Kyn content in primary tumors and TDLNs of tumor-bearing mice after different treatments  
 118 ( $n = 3$ ). (f) Antigen Ki-67 staining in tumor sections from each experiment group ( $n = 3$ ). (g)  
 119 Images and (h) corresponding fluorescence intensity of IDO immunofluorescence staining in  
 120 primary tumors of 4T1 tumor-bearing mice after various treatments. DAPI was used to stain the  
 121 nucleus of the cell (blue), and the IDO was stained with anti-IDO antibodies (red) ( $n = 3$ ). (i)



122 Average tumor growth curves after being treated by re-challenge. ( $n_{\text{LGG-MHI+US}} = 2$ ,  $n_{\text{LGG-MHS+US}}$   
123  $= 4$ )

124 According to the reviewer's suggestion, biological replicates such as biological  
125 replication of LGG-associated agar plate have been added. To explore the tumor  
126 targeting ability of LGG, the tumor tissues and major organs of 4T1 tumor-bearing  
127 mice were homogenized and coated on MRS agar plates at different time points (0, 2,  
128 6, 24 and 72 h) after injection of the LGG. By counting the colony forming units  
129 (CFU) in each plate, we found that the CFU amount of LGG in the tumor was  
130 significantly higher than the other organs, which further supports the superior tumor  
131 targeting and penetration ability of LGG (**Supplementary Fig. 6a, b**). The related  
132 data and discussion have been added in the Revise Manuscript and Revised  
133 Supplementary Information (**Figure 6, Page 13, Revised Supplementary**  
134 **Information**).

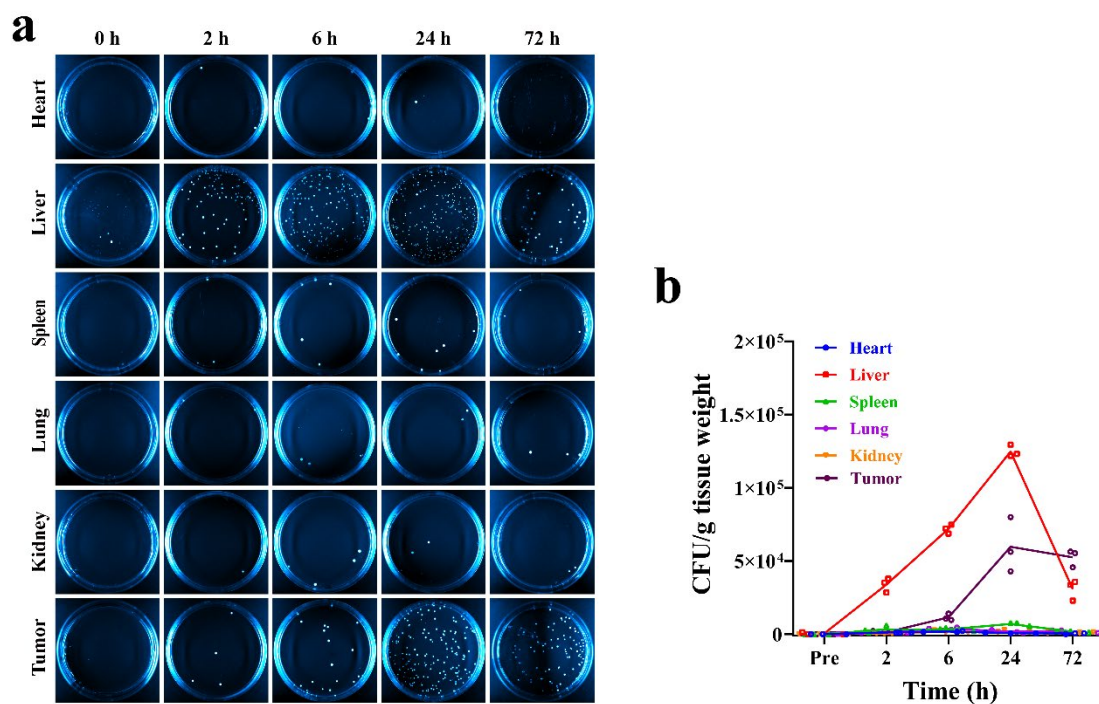

135

136 **Supplementary Figure 6.** (a) Representative photographs of MRS agar plates and (b)  
137 corresponding quantitative analysis of bacterial colonization in various organs and tumor of 4T1-  
138 bearing mice in a different time (0, 2, 6, 24, and 72 h) ( $n = 3$ ).

139



140 In addition, all data in the manuscript have been double-checked, and the  
141 inappropriate statistical methods have been corrected. Based on this fact, we have  
142 added the following brief description in the Revised Manuscript, which reads:  
143 "GraphPad Prism (version 9.0.0, GraphPad Software, San Diego, California USA)  
144 was employed to calculate all statistical analyses. Tumor growth curves were analyzed  
145 using two-way ANOVA. Dunnett's multiple comparisons post test was utilized to  
146 analyze hematological indexes. And for other comparisons, unpaired Student's t-test  
147 was used when comparing two groups and one-way ANOVA with Holm Sidak  
148 correction for multiple testing was used when comparing more than two groups. The  
149 p-value less than 0.05 was considered significant (\*  $p < 0.05$ , \*\*  $p < 0.01$ , \*\*\*  $p <$   
150  $0.001$ , \*\*\*\*  $p < 0.0001$ )." (Line 723-729, Page 24, Revised Manuscript)

151

152 *3. The authors claim multiple mechanisms of their therapy contributing to the efficacy.*  
153 *However, individual contributions from each component and rationale for their*  
154 *combination are not clear. For example, there seems to be two mechanisms in which*  
155 *US works with this approach. On one hand the authors claims that the generation of*  
156 *ROS kills the tumor cells which shows apoptosis of most cells when treated in vitro.*  
157 *On the other hand, the authors also argue that US triggers release of CRISPR*  
158 *complex from the lysosomal compartments. It is not clear how CRISPR system can*  
159 *contribute to this therapy if the tumor cells are killed anyways. Deaths of the cells can*  
160 *simply result in the reduction of IDO levels.*

161 **Response:** Thank you very much for your kind comments and questions. Each of the  
162 components and their corresponding contributions have been described in detail above.  
163 Treatment of tumors *in vivo*, which not only suffers from hypoxia but also from  
164 immunosuppression and many other elements, it is obvious that ROS alone cannot  
165 produce satisfactory therapeutic effects<sup>35-37</sup>.

166 We have added the following brief description in the Revised Manuscript, which

167 reads: “In addition, hypoxia plays a crucial role in the tumor immunosuppressive  
168 microenvironment and largely influences the outcome of treatment. Given the critical  
169 role of hypoxia in tumor progression and its resistance to treatment, many efforts have  
170 been made to overcome the limitations associated with hypoxia regarding tumors.”  
171 **(Line 500-503, Page 16, Revised Manuscript)**

172 In addition, the LGG-MH +US (without Cas9/sgRNA) group was included in  
173 animal experimental models. The results showed that this strategy did not show a  
174 satisfactory therapeutic effect either in the primary tumors or in the against re-  
175 challenge and lung metastasis of tumors **(Fig. 6-8, Revised Manuscript)**.

176 In summary, we constructed a self-driven probiotic delivery CRISPR/Cas9  
177 system, which utilizes *Lactobacillus* as a vector, realizing efficient delivery of  
178 CRISPR/Cas9 system to knockdown *IDO1* to reduce immunosuppressive cells  
179 (Tregs), while *Lactobacillus* activates multiple anti-tumor signaling pathways to  
180 activate intrinsic immunity, in addition, the system can improve gene editing  
181 efficiency and cause immunogenic cell death (ICD) when triggered by US irradiation,  
182 this "cocktail therapy" can effectively activate immune cells to eliminate the primary  
183 tumor and inhibit the lung metastasis and against re-challenge of tumors.

184

185 *4. The mechanisms in which conjugated MHS gets released from LGG and get into*  
186 *cancer cells are also unclear. Another contradiction is the delivery of the MHS. It was*  
187 *not clear how MHS was delivered. Since authors showed MHS do not accumulate in*  
188 *tumors after systemic injections, how come MHS+US show strong efficacy?*

189 **Response:** Thank you very much for your kind comments and questions. In our self-  
190 driven nanosystem therapeutic strategy, parthenogenic anaerobic LGG acts as a  
191 hypoxia targeting vector to target the tumor hypoxic microenvironment by  
192 electrostatic adsorption of loaded MHS. When LGG-MHS is enriched in the tumor  
193 hypoxic microenvironment, the acidic nature of the tumor microenvironment reduces

194 the force between the drug molecules and the carrier material, facilitating the release  
195 of the drug and thus improving the delivery efficiency of the MHS<sup>38-40</sup>. Nanodrugs  
196 usually enter the cell by endocytosis. In this process, the membrane region in contact  
197 or bound to the nanoparticle invaginates or folds, forming a vesicle pocket on the  
198 cytoplasmic side, which in turn detaches from the plasma membrane to form a vesicle.  
199 Endocytosis is divided into phagocytosis and cytokinesis, while cytokinesis is the  
200 main way of internalizing nanoparticles in tumor cells and most somatic cells.  
201 Depending on the types of proteins involved, cytosolic drinking is divided into lattice-  
202 mediated endocytosis and small concave protein-mediated endocytosis. And ZIF-8 is  
203 mainly internalized by fossa-mediated endocytosis<sup>41-43</sup>.

204 We sincerely apologize for the misunderstanding of the reviewers as we may not  
205 have been clear enough in the original manuscript. After tail vein administration, the  
206 MHS penetrate into the tumor area mainly through passive targeting by enhanced  
207 permeability and retention (EPR) effect whereas the lack of active targeting leads to  
208 inefficient enrichment in the tumor. Although the enrichment efficiency of MHS into  
209 tumor by passive targeting is not high, a certain amount of MHS is still enriched at the  
210 tumor. Under the US irradiation, it will produce ROS to kill tumor cells and trigger  
211 ICD. On the other hand, the generated ROS can promote the release of Cas9/sgRNA,  
212 implement gene editing *in vivo* to knock down *IDO1*, which can block the body  
213 immune tolerance caused by overexpression of IDO protein as an immunosuppressive  
214 factor in 4T1 tumor cells, thereby promoting the disintegration of the tumor  
215 immunosuppressive microenvironment. Therefore, MHS+US can show relatively  
216 powerful therapeutic effects. It is also noteworthy that our study demonstrated that  
217 although MHS + US displayed relatively powerful therapeutic effects in killing tumor  
218 cells *in vitro* and treating primary tumors, it was unsatisfactory in combating tumor  
219 metastasis (**Fig.8f-j, Revised Manuscript**). We have added the following brief  
220 description in the Revised Manuscript, which reads: “Notably, MHS + US and LGG-  
221 MH + US, despite their powerful therapeutic effects in primary tumors, did not  
222 produce satisfactory systemic immune activation against distant tumors and lung

223 metastases.” (Line 476-478, Page 15, Revised Manuscript)

224

225 5. Many important information such as controls is missing which makes it difficult to  
226 properly evaluate the data. First, several important data is missing biological  
227 replicates. For example, data supporting the CRISPR-mediated gene editing only  
228 shows single replicate or just the genetic sequence.

229 **Response:** Thanks very much for your question. We totally understand the reviewer’s  
230 concern, which is highly appreciated. According to the reviewer’s suggestion, the  
231 CRISPR-mediated gene editing has been repeated three times. To investigate the gene  
232 editing efficacy of the MHS nanosystem under US irradiation, Cas9/sgRNA-mediated  
233 *IDO1* degradation was examined in 4T1 cells by T7 endonuclease I. As the results  
234 reveal that the MHS + US group produced more cleavage products relative to the  
235 MHS group (Fig. 3i and Supplementary Fig. 3h). This result proves that the MHS  
236 nanosystem under US irradiation efficiently deliver the CRISPR/Cas9 system and  
237 perform target gene loci knockdown for the gene editing purposes. The related data  
238 and discussion have been shown in the Revised Manuscript and Revised  
239 Supplementary Information (Line 216-220, Page 7, Revised Manuscript).

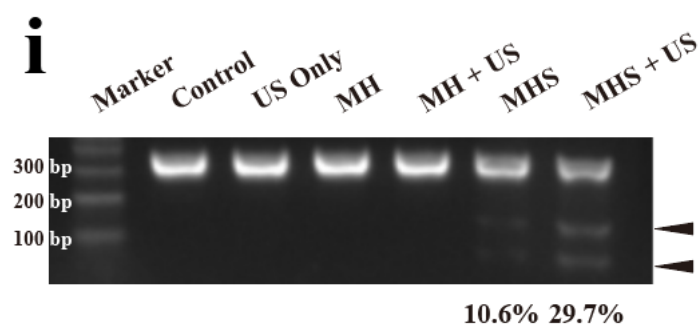

241 **Fig. 3 Evaluation of US-associated *IDO1* genome editing *in vitro*.** (i) T7EI cleavage analysis  
242 after 4T1 cells with different treatments, including control, US only, MH, MH + US, MHS and  
243 MHS + US ( $n = 3$ ).

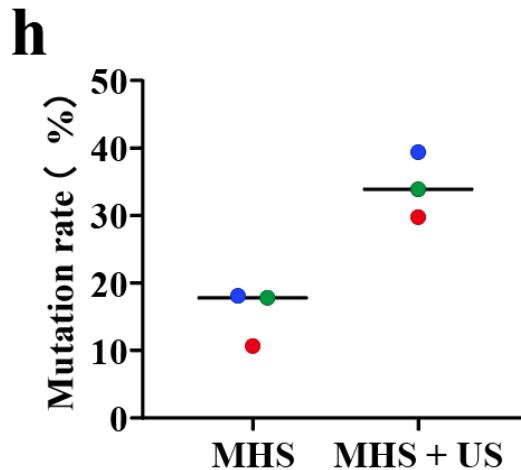

244

245 **Supplementary Figure 3.** (h) Corresponding quantitative analysis of T7E I cleavage after 4T1  
 246 cells with different treatments, including control, US only, MH, MH + US, MHS, and MHS + US.

247

248 *6. The biodistribution of LGG in vivo were shown with single agar plate per group,*  
 249 *but there are no quantifications or biological replicates. In Fig. S14, it seems like the*  
 250 *bacteria level is decreasing from 24 to 72hrs in both liver and tumors, which is*  
 251 *different from what the authors had claimed in the manuscript. Since the use of LGG*  
 252 *for tumor targeting is new, this approach warrants more careful characterizations.*

253 **Response:** Thanks very much for pointing this issue out. According to the reviewer's  
 254 suggestion, the agar plate replicates and quantification of LGG have been performed.  
 255 To explore the tumor targeting ability of LGG, the tumor tissues and major organs of  
 256 4T1 tumor-bearing mice were homogenized and smeared at different time points. By  
 257 counting the colony forming units (CFU) in each plate, the results show that the  
 258 amount of LGG has a trend to decrease after 24 h in both tumor and liver. However,  
 259 what is even more remarkable than that is the decreased trend is relatively slight in  
 260 tumor compared to the liver. In addition, the CFU amount of LGG in the tumor was  
 261 significantly higher than the liver at 72 h. which further supports the superior tumor  
 262 targeting and penetration ability of LGG (**Supplementary Fig. 6a, b**). The related  
 263 data and discussion have been added in the Revised Manuscript (**Line 273-282 ,Page**  
 264 **9, Revised Manuscript**).

265 Furthermore, we are extremely regretful for the error in the description and  
266 typography of S14 in the manuscript, which in the original manuscript was about the  
267 exploration of LGG alone tumor targeting and was mistyped as “LGG-MHS” in the  
268 manuscript. The modified data are shown in **Supplementary Fig. 6b**.

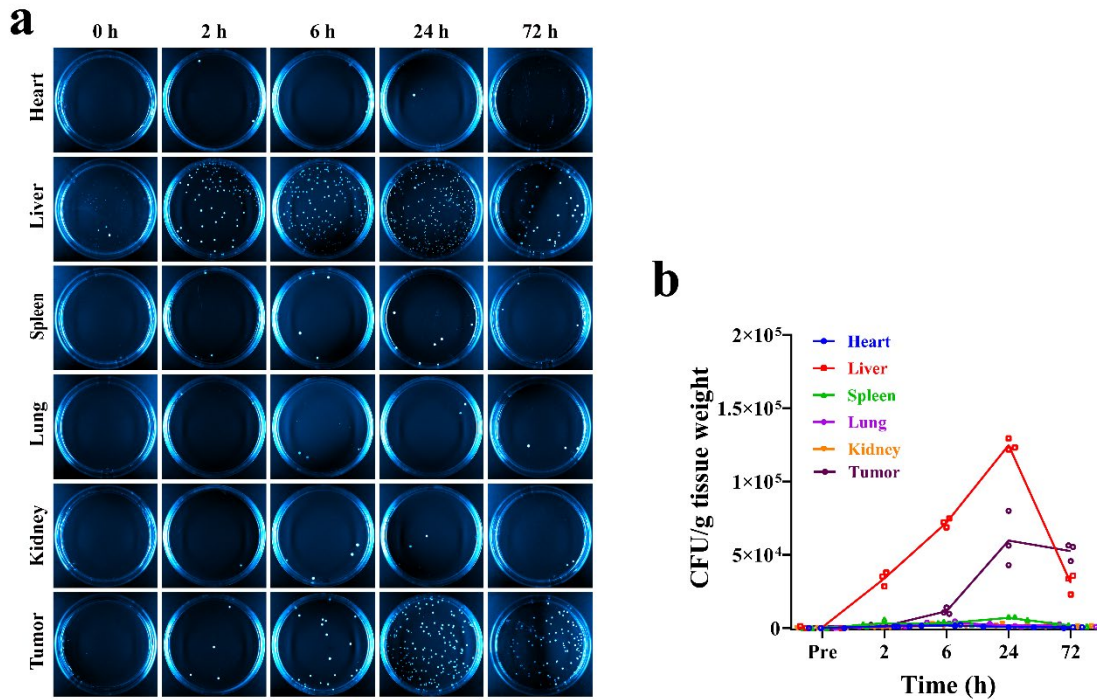

269

270 **Supplementary Figure 6.** (a) Representative photographs of MRS agar plates and (b)  
271 corresponding quantitative analysis of bacterial colonization in various organs and tumor of 4T1-  
272 bearing mice in a different time (0, 2, 6, 24, and 72 h) ( $n = 3$ ).

273

274 7. Second, there are lack of description regarding the statistical analyses performed  
275 and some interpretations of the data are questionable. In Fig. 6, the figure caption  
276 describes the statistical test as *t*-test, but these data include multiple groups and  
277 timepoints which cannot be analyzed with the *t*-test.

278 **Response:** Thanks very much for pointing this issue out. We apologize for the  
279 inappropriate analysis methods used in the data counts. We have re-run the statistical  
280 analysis using appropriate statistical methods for all data. We have added the  
281 following brief description in the Revised Manuscript which reads: “GraphPad Prism

282 (version 9.0.0, GraphPad Software, San Diego, California USA) was employed to  
283 calculate all statistical analyses. Tumor growth curves were analyzed using two-way  
284 ANOVA. Dunnett's multiple comparisons post test was utilized to analyze  
285 hematological indexes. And for other comparisons, unpaired Student's t-test was used  
286 when comparing two groups and one-way ANOVA with Holm Sidak correction for  
287 multiple testing was used when comparing more than two groups. The p-value less  
288 than 0.05 was considered significant (\*  $p < 0.05$ , \*\*  $p < 0.01$ , \*\*\*  $p < 0.001$ , \*\*\*\*  $p <$   
289  $0.0001$ )." (Line 723-729, Page 24, Revised Manuscript)

290

291 *8. Third, some key controls are missing from several experiments. For example, the*  
292 *authors included some combination of their systems to compare their efficacy, but*  
293 *LGG+US is missing from the experimental groups. Is it possible that LGG+US is just*  
294 *as effective as LGG-MHS+UG?*

295 **Response:** Thank you for your kind comments. In order to better represent the  
296 efficacy of each component in tumor treatment, we added two group animal models,  
297 which named LGG-MH+US (without CRISPR/Cas9 system) and LGG-MHI+US (the  
298 I in MHI is the IDO small molecule inhibitor NLG919). Mice were randomly divided  
299 into 8 groups, which including Control, LGG, MHS, LGG-MHS, MHS + US, LGG-  
300 MH + US, LGG-MHI + US and LGG-MHS + US. As a result, the LGG-MHS + US  
301 group showed excellent ability to inhibit tumor growth and against lung metastasis  
302 compared to other groups. (Figure 6-8, Revised Manuscript) The related data and  
303 discussion have been added in the Revised Manuscript. (Line 356-371, Page 11-12,  
304 Revised Manuscript)



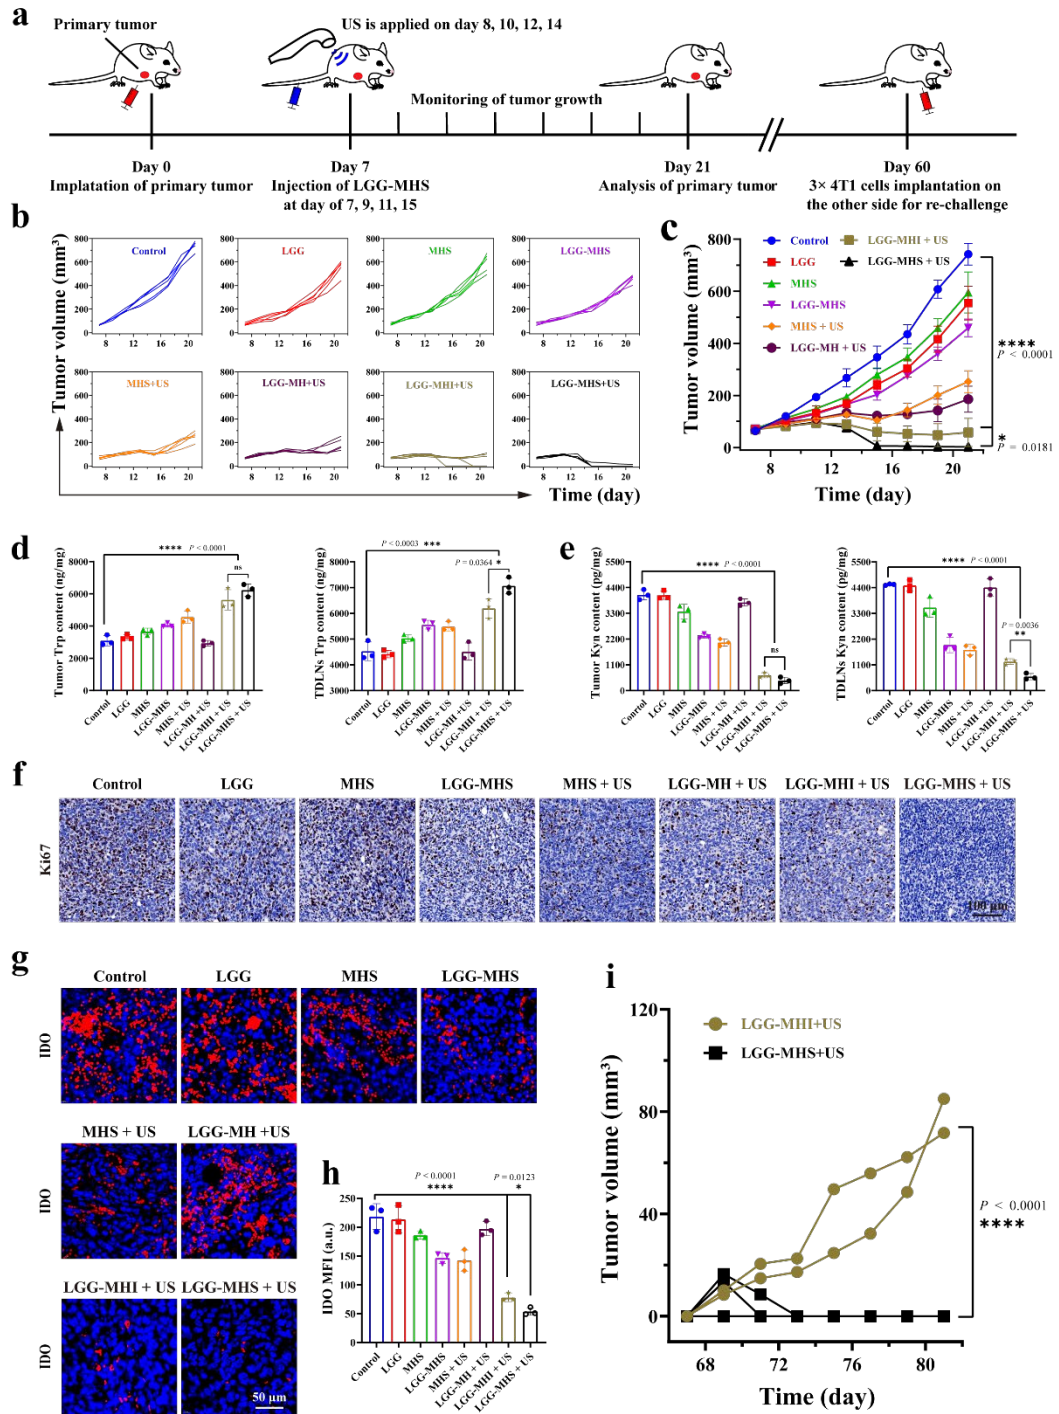

305

306 **Fig. 6 LGG-MHS + US against 4T1 tumor *in vivo*.** (a) Schematic diagram of primary tumor  
 307 treatment process *in vivo*. (b) Tumor growth curves of 4T1 after being treated by PBS, LGG, MHS,  
 308 LGG-MHS, MHS + US, LGG-MH + US, LGG-MHI + US and LGG-MHS + US ( $n = 5$ ). (c)  
 309 Average tumor growth curves in different groups ( $n = 5$ ). (d) HPLC assay of the Trp content in  
 310 primary tumors and TDLNs of tumor-bearing mice after different treatments ( $n = 3$ ). (e) Elisa  
 311 assay Kyn content in primary tumors and TDLNs of tumor-bearing mice after different treatments  
 312 ( $n = 3$ ). (f) Antigen Ki-67 staining in tumor sections from each experiment group ( $n = 3$ ). (g)  
 313 Images and (h) corresponding fluorescence intensity of IDO immunofluorescence staining in  
 314 primary tumors of 4T1 tumor-bearing mice after various treatments. DAPI was used to stain the



315 nucleus of the cell (blue), and the IDO was stained with anti-IDO antibodies (red) ( $n = 3$ ). (i)  
 316 Average tumor growth curves after being treated by re-challenge. ( $n_{LGG-MHI + US} = 2$ ,  $n_{LGG-MHS + US}$   
 317  $= 4$ )

318

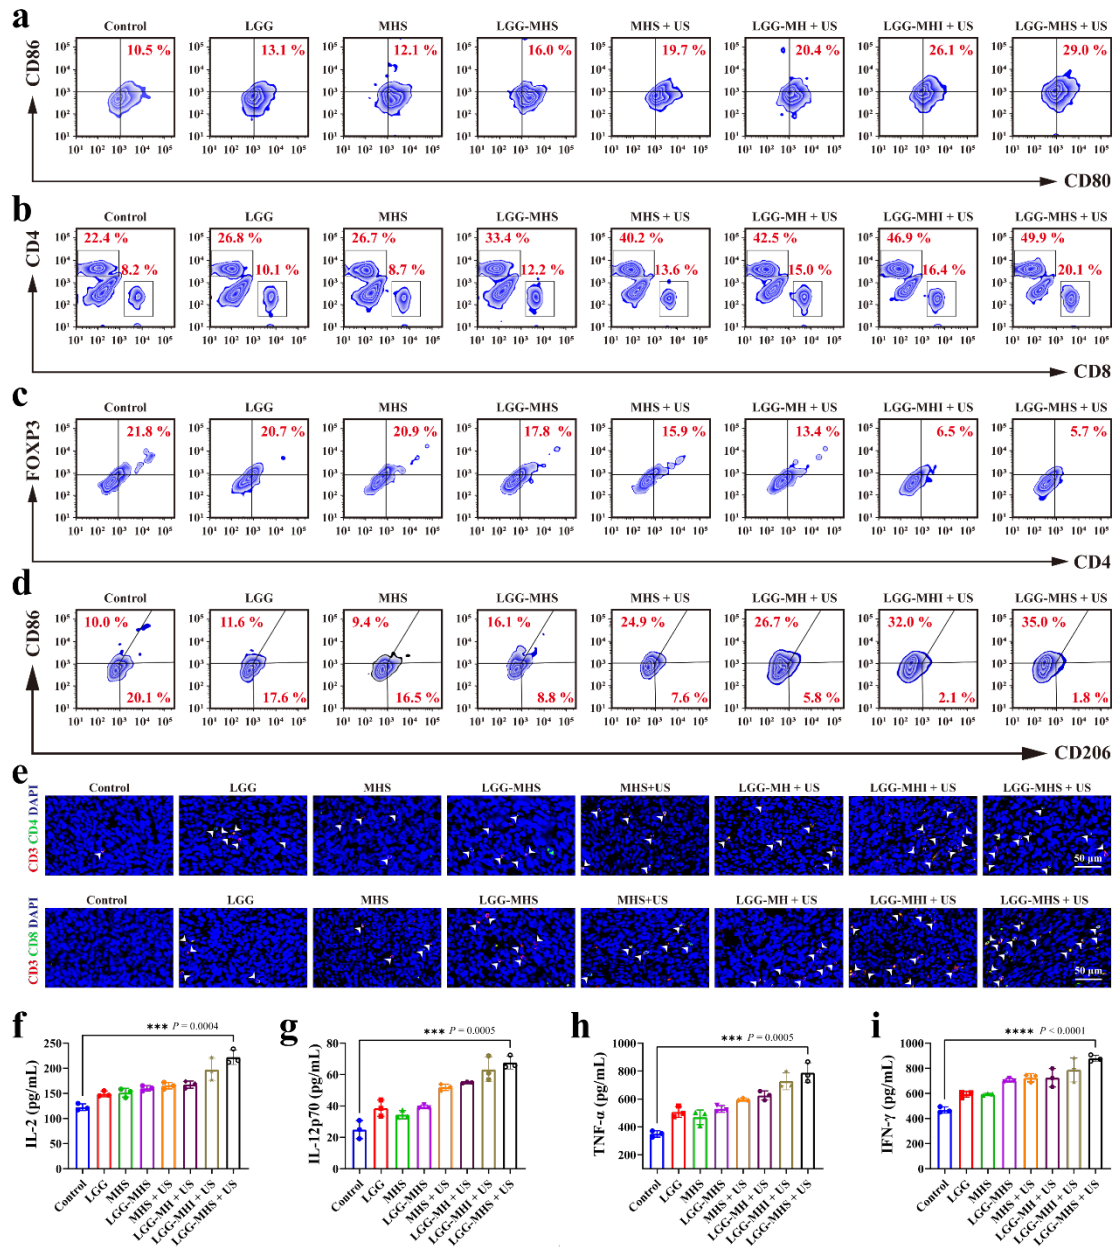

319

320 **Fig. 7. Reprogramming of the tumor immunosuppressive microenvironment by the self-driven**  
 321 **LGG-MHS + US nanosystem.** (a) Typical flow cytometric of mature DCs in tumor tissue after 24  
 322 h after the first different treatments ( $n = 3$ ). (b) Typical flow cytometric of T cells of CD4<sup>+</sup> and  
 323 CD8<sup>+</sup> T cells in the spleen after 24 h after the first different treatments ( $n = 3$ ). (c) Typical flow  
 324 cytometric of Tregs in primary tumor tissue after 24 h after the first different treatments ( $n = 3$ ). (d)  
 325 Representative flow cytometric of M2 macrophages in spleen after 24 h after the first different  
 326 treatments ( $n = 3$ ). (e) Immunofluorescence images of helper T lymphocytes (CD3<sup>+</sup>CD4<sup>+</sup>) and

327 proliferated cytotoxic T lymphocytes (CD3<sup>+</sup>CD8<sup>+</sup>) in primary 4T1 tumor tissue slices (*n* = 3). (f-i)  
 328 Levels of the IL-2, IL-12p70, IFN- $\alpha$ , and TNF- $\gamma$  in primary tumor tissues after 24 h after the first  
 329 different treatments (*n* = 3).

330

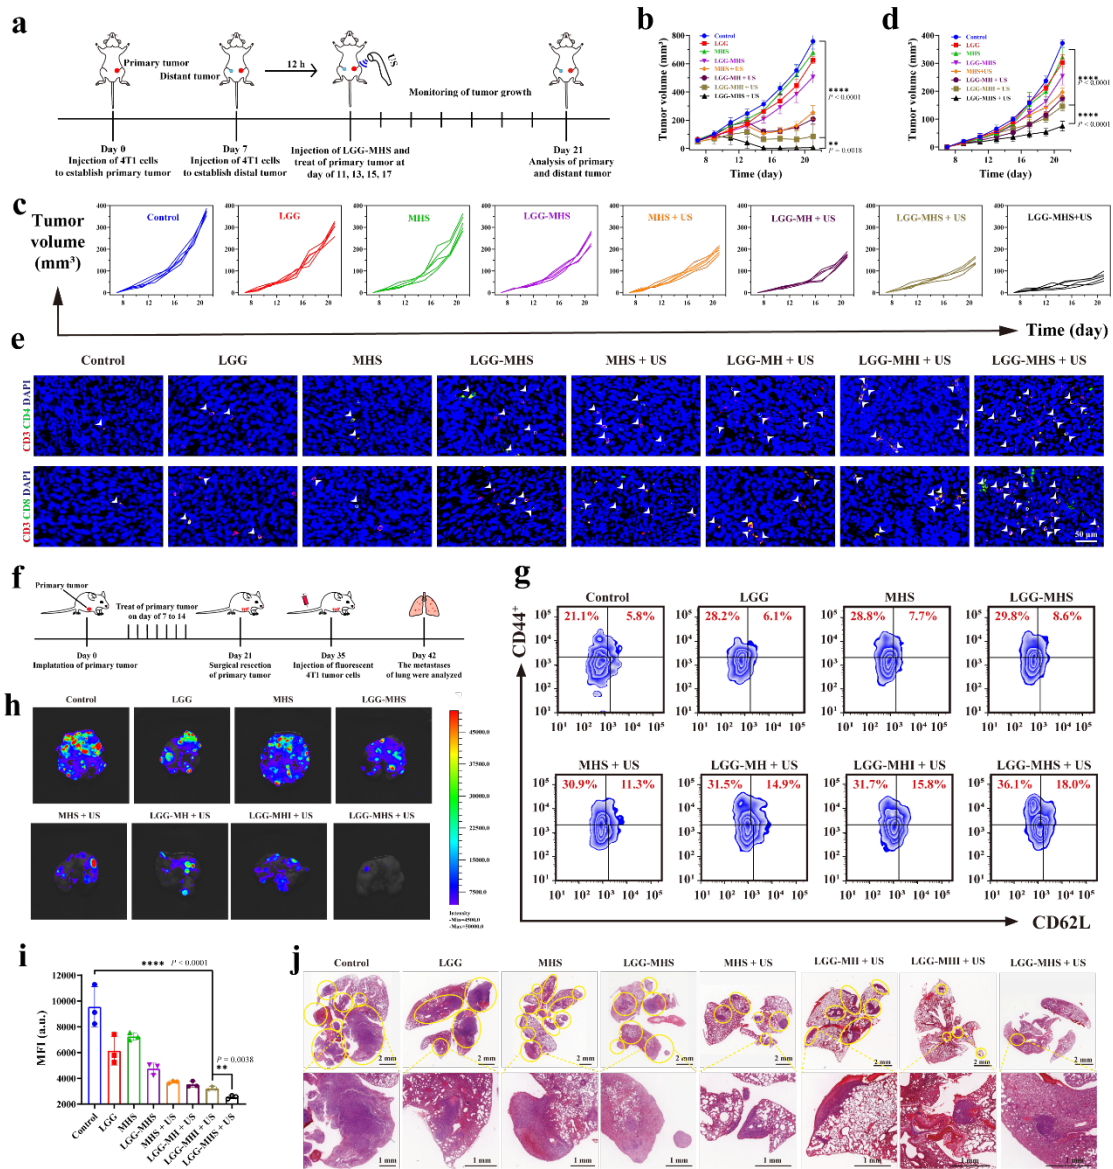

331

332 **Fig. 8 Anti distal tumor effect and immunological memory of LGG-MHS + US in the 4T1**  
 333 **bearing mice model.** (a) Schematic diagram of the establishment of distal tumors model and the  
 334 experimental procedure of treatment. (b) Average tumor growth curves of primary tumor in  
 335 different groups (*n* = 5). \**P* < 0.05, \*\**P* < 0.01, \*\*\**P* < 0.001, \*\*\*\**P* < 0.0001. (c) Mean growth  
 336 curves and (d) corresponding growth curves of distant tumors in different groups (*n* = 5). \**P* <  
 337 0.05, \*\**P* < 0.01, \*\*\**P* < 0.001, \*\*\*\**P* < 0.0001. (e) Immunofluorescence images of helper T  
 338 lymphocytes (CD3<sup>+</sup>CD4<sup>+</sup>) and proliferated cytotoxic T lymphocytes (CD3<sup>+</sup>CD8<sup>+</sup>) in 4T1 tumor  
 339 tissue slices of distal tumor (*n* = 3). (f) Schematic diagram of the establishment and treatment  
 340 process of mouse models of lung metastasis. (g) Typical flow cytometric of the effector memory T

341 cells (CD3<sup>+</sup>CD8<sup>+</sup>CD44<sup>+</sup>CD62L<sup>-</sup>) (Tem) and (CD3<sup>+</sup>CD8<sup>+</sup>CD44<sup>+</sup>CD62L<sup>+</sup>) (Tcm) in the spleen  
342 after 24 h after the first different treatments ( $n = 3$ ). (h) Bioluminescence images and (i)  
343 corresponding fluorescence intensity quantification of lung metastatic nodules of the 4T1 tumors  
344 ( $n = 3$ ). (j) HE staining of lung tissue from different groups of 4T1 tumor-bearing mice. The  
345 nodules with yellow circles in the section diagram indicate metastases in the lungs.

346

347 *9. Lastly, some details on experimental settings are missing which makes it difficult to*  
348 *properly assess what was done. In the animal experiments, it is not clear how the*  
349 *treatment was performed. How were LGG-MHS administered and how many times? If*  
350 *the LGG-MHS was administered systemically, did they also get to the distal tumors in*  
351 *Fig. 8 experiments? The possibility of LGG-MHS colonization and its effect on distal*  
352 *tumors needs to be excluded before the authors claim the contribution of systemic*  
353 *immunity.*

354 **Response:** Thank you very much for pointing this issue out. We administered LGG-  
355 MHS by tail vein injection. Following injection of tumor cells into the right axilla of  
356 the mice on day 0, LGG-MHS was injected on days 7, 9, 11 and 13. The mice were  
357 treated with US irradiation in several groups on the 8th, 10th, 12th and 14th days. The  
358 experimental details have been provided in the Revised Manuscript according to the  
359 reviewer's kind suggestions, which reads: "4T1 tumor cells ( $1 \times 10^6$ ) were injected  
360 into the axillary of female Balb/c mice (~20 g) to establish a xenograft tumor model.  
361 These mice were divided at random into 8 groups (*per* group,  $n = 5$ ): control (200  $\mu$ L,  
362 PBS), LGG (200  $\mu$ L, LGG =  $1 \times 10^7$  CFU), MHS (200  $\mu$ L, MHS = 10 mg/kg), LGG-  
363 MHS (200  $\mu$ L, LGG =  $1 \times 10^7$  CFU, MHS = 10 mg/kg), MHS + US (200  $\mu$ L, MHS =  
364 10 mg/kg, US = 1.0 MHz, 1.0 W/cm<sup>2</sup>, 50% duty cycle, 5 min), LGG-MH + US (200  
365  $\mu$ L, LGG =  $1 \times 10^7$  CFU, MH = 10 mg/kg, US = 1.0 MHz, 1.0 W/cm<sup>2</sup>, 50% duty  
366 cycle, 5 min), LGG-MHI + US (200  $\mu$ L, LGG =  $1 \times 10^7$  CFU, MHI = 10 mg/kg, US =  
367 1.0 MHz, 1.0 W/cm<sup>2</sup>, 50% duty cycle, 5 min), LGG-MHS + US (200  $\mu$ L, LGG =  $1 \times$   
368  $10^7$  CFU, MHS = 10 mg/kg, US = 1.0 MHz, 1.0 W/cm<sup>2</sup>, 50% duty cycle, 5 min). The  
369 above drugs were injected on days 7, 9, 11, and 13, respectively, and the treatment  
370 groups with US application were irradiated with US on days 8, 10, 12, and 14,

371 respectively. Tumor volume and body weight of mice were measured every 2 days  
372 during days 7-21. Calculate the tumor volume according to the formula (tumor length)  
373  $\times$  (tumor width)<sup>2</sup>/2.” (Line 662-674, Page 22, Revised Manuscript).

374 Since the LGG-MHS nanosystem is administered systemically *via* tail vein  
375 injection, some of the LGG-MHS is bound to enter the distal tumor site as well due to  
376 hypoxia targeting properties of LGG. However, since the control variable is the  
377 imposition of US, the distal tumors cannot produce ROS to trigger DAMPs to  
378 promote immunotherapy, resulting in the distal tumors in the LGG-MHS group of  
379 mice are not eliminated. (Fig 6, Page 37, Revised Manuscript).

380

381 *10. overall, while the amount of data presented in the manuscript is impressive, the*  
382 *above points need to be addressed to properly assess the claims of the study.*

383 **Response:** All reviewers' concerns have been addressed. Finally, we are very grateful  
384 for your comments and suggestions on our ideas and work, which are very important  
385 for us to improve and revise the manuscript.

386

387 *Other points:*

388 *1.- There seems to be several typo, missing figure reference, and mislabeling that*  
389 *should be corrected*

390 **Response:** Thank you very much for pointing this issue out. We have carefully  
391 checked and corrected misspellings in the manuscript.

392

393 *2.- Reference #30 do not include studies supporting LGG colonization in tumors*

394 **Response:** Thank you very much for pointing this issue out. We have replaced

395 reference #30, citing the reported article on tumor-targeted therapy with Lactobacillus  
396 as a reference to support our intent to apply LGG<sup>44</sup>. (Line 89, Page 3, Revised  
397 Manuscript).

398

399 3.- Reference #31 did not show LGG tumor colonization and local remodeling of the  
400 microenvironment

401 **Response:** Thank you very much for pointing this issue out. Reference #31 in the  
402 original manuscript has been removed.

403

404 4.- Line 132-134 is misleading. Fig. S3 shows some residual RNA by 3 hours. Where  
405 are the replicates?

406 **Response:** Thank you very much for pointing this issue out. In order to clearly convey  
407 what we were trying to express and to address the reviewers' concerns about  
408 reproducibility, we improved the experiment by increasing the loading volume (300  
409 ng) and extending the incubation time to 24 h, the experiments were performed three  
410 times and quantified. The results of sgRNA stability are shown in Supplementary  
411 Figure 2d-e. The sgRNA with MH remained stable after 12 h. On the contrary, the  
412 free sgRNA was almost completely degraded, which further indicates that  
413 Cas9/sgRNA can minimize degradation after being loaded by MH. The related data  
414 and discussion have been added in the Revised Manuscript and Revised  
415 Supplementary Information (Line 144-151, Page 5, Revised Manuscript;  
416 Supplementary Figure 2d, e, Page 8, Revised Supplementary Information).

417

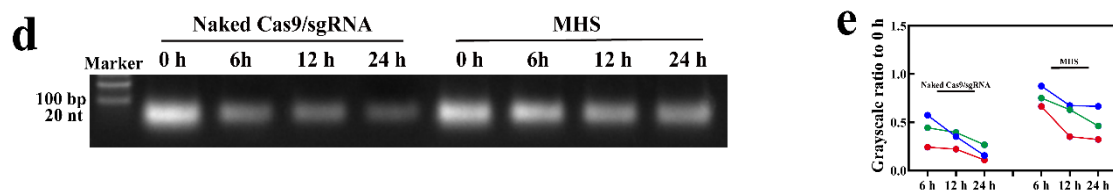

418 **Supplementary Figure 2.** (d) Agarose gel electrophoresis and (e) corresponding quantitative  
419 analysis to evaluate the serum stability of naked Cas9/sgRNA and Cas9/sgRNA reconstituted from  
420 MHS ( $n = 3$ ).

421

422 *5.- Line 135-137: Is pH5 relevant to tumor microenvironment? How does this release*  
423 *relate in the in vivo conditions, since the CRISPR complexes needs to be delivered to*  
424 *intracellular regions? If it is released prematurely in the tumor microenvironment,*  
425 *doesn't this reduce the efficacy?*

426 **Response:** Thank you very much for the kind question. It is shown that the tumor  
427 microenvironment is slightly more acidic with a weak acidity of pH 6 to 7 relative to  
428 normal tissue pH due to poor vascular perfusion, regional hypoxia and fermentative  
429 glycolysis<sup>45, 46</sup>. The intracellular pH of tumor cells can be even as low as 4 to 6<sup>47-49</sup>.  
430 Therefore, we used pH=5 to simulate the acidic environment of intracellular  
431 lysosomes in tumor cells to verify that the acidic microenvironment of lysosomes can  
432 promote the release of ZIF-8-loaded CRIPR/Cas9<sup>50</sup>. It was proven that the CRISPR  
433 complex would be released in trace amounts in the weakly acidic tumor  
434 microenvironment. The loss of trace amounts of CRISPR complexes due to premature  
435 release was compensated by increasing the number of doses. Therefore, the reduction  
436 in efficacy is negligible.

437

438 *6.- Fig. 3d label should be edited. It isn't showing % viability*

439 **Response:** Thank you very much for pointing this issue out. We have carefully  
440 reviewed and edited the label. (**Fig. 3d, Page 32, Revised Manuscript**)

441

442 *7.- Line 224-226: where is the data supporting this claim?*

443 **Response:** Thank you very much for the kind question. After double-checking and

444 refining the content of the manuscript with regard to the reviewer's concerns, we have  
445 confirmed that line 224-226 are notes to the original manuscript, Figure 3h, 3i. In the  
446 Revised Manuscript, which reads: "(i) T7EI cleavage analysis after 4T1 cells with  
447 different treatments, including control, US only, MH, MH + US, MHS and MHS +  
448 US ( $n = 3$ ). (j-k) Deep sequencing analysis of gene editing in 4T1 cells in the presence  
449 of MHS and MHS+US." (Line 884-886, Page 33, Revised Manuscript)

450

451 8.- Fig. 4f and g: why did the authors just decided to look into IL-12p70 and IL-2  
452 among all other cytokines?

453 **Response:** Thank you very much for the kind question. IL-2 is a pleiotropic cytokine  
454 produced by T-cell antigen activation, also known as T-cell growth factor. It has been  
455 shown that IL-2 mediates a range of immune effects by binding to IL-2 receptors on  
456 the surface of lymphocytes, and that cellular responses in vivo are regulated by the  
457 amount of IL-2 produced in response to antigens. The production of IL-2 receptors on  
458 the surface of immune cells is stimulated and acts by autocrine or paracrine means.  
459 The result is the expansion and activation of macrophages, natural killer cells, B  
460 lymphocytes, *etc*<sup>51-53</sup>.

461 IL-12p40 (p40) is known to be a subunit of the IL-12 cytokine family, which  
462 binds to the p35 subunit to form IL-12p70 (IL-12). IL-12 has excellent antitumor  
463 effects, for example, shifting CD4<sup>+</sup> Th0 cells to a Th1 phenotype<sup>54-56</sup>, increasing  
464 activated NK cells, the proliferation, survival and/or cytotoxic capacity of CD8<sup>+</sup> and  
465 CD4<sup>+</sup> T cells<sup>57</sup> and programming T cells for optimal progression to effector memory T  
466 cells<sup>58</sup>, among others.

467 Therefore, we chose to study IL-2 and IL-12p70 among numerous cytokines to  
468 validate the antitumor effects of MHS nanosystem.

469



470 9.- Fig. 5a and c: Are LGG and MHS both labeled with Cy5? If so, shouldn't one  
471 expect much higher signal from LGG-MHS compared to LGG alone? It looks like they  
472 are at similar levels, possibly suggesting that MHS is not getting to tumors

473 **Response:** Thank you very much for the kind question. We apologize for the lack of a  
474 clear description of the experimental steps in the manuscript, which led to  
475 misunderstanding by the reviewers. When using VISQUE imaging system to explore  
476 the *in vivo* hypoxic targeting of LGG, we labeled MHS only with cy5.5 in the LGG-  
477 MHS group, LGG was not labeled, and the amount of cy5.5 used in each group was  
478 equal (10  $\mu$ g/mL). Therefore, there was no significant difference between the signal  
479 of LGG-MHS compared with LGG alone. The related experimental details have been  
480 provided in the Revised Manuscript according to the reviewer's kind question, which  
481 reads: "Cy5.5-labeled MHS (200  $\mu$ L, Cy5.5-MHS = 10 mg/kg, Cy5.5 = 10  $\mu$ g/mL),  
482 Cy5.5-labeled LGG (200  $\mu$ L, Cy5.5-LGG =  $1 \times 10^7$  CFU, Cy5.5 = 10  $\mu$ g/mL) and  
483 Cy5.5-labeled LGG-MHS (200  $\mu$ L, LGG =  $1 \times 10^7$  CFU, Cy5.5-MHS = 10 mg/kg,  
484 Cy5.5 = 10 $\mu$ g/mL) were intravenously injected into mice when the tumors volume  
485 reached about 200 mm<sup>3</sup>. At various time points (0, 2, 4, 6, 8, 12, 48 and 72 h), mice  
486 were anesthetized and imaged by VISQUE imaging system." (Line 638-642, Page 21,  
487 **Revised Manuscript**)

488

489 10.- Since the authors had claimed the ability for MHS to remodel immunometabolism,  
490 RNA sequencing result on LGG-MHS may be helpful to decipher the contribution on  
491 TME remodeling from LGG alone vs LGG-MHS.

492 **Response:** Thank you very much for the kind comments and suggestions. We  
493 apologize for the errors in the description and layout of the paper that caused some  
494 confusion to the reviewers. Firstly, we have demonstrated the targeting of LGG and  
495 then further explored the effect of LGG on the tumor microenvironment. Therefore,  
496 the main purpose of conducting RNA sequencing was to investigate the potential



497 mechanism of LGG on tumor therapy. Subsequently we also demonstrated that LGG  
498 after loading the MHS system, it still has favorable biological activity. Therefore,  
499 LGG in the LGG-MHS system not only acts as a vector but also has a role in  
500 activating the immune system. Additionally, we agree that the RNA sequencing  
501 results of LGG-MHS could help decipher the contribution of LGG alone versus LGG-  
502 MHS to TME remodeling, but the severe COVID-19 pandemic conditions in  
503 Shanghai led to laboratory closing and prevented further access to in-depth studies.

504 In addition, the remodeling effect of MHS on tumor microenvironment was fully  
505 investigated *in vitro*, and the general process is that the entry of MHS into tumor cells,  
506 under US irradiation, triggers molecular damage related patterns, which in turn  
507 promotes the infiltration of immune cells at the tumor site. Moreover, in the  
508 subsequent animal experiments, we also included MHS as a separate group, so as to  
509 investigate the contribution of MHS to tumor immunity *in vivo*.

510

511 *11.- Fig. S17: where are the data showing bacteria levels in tumors? This should also*  
512 *be quantified with biological replicates.*

513 **Response:** Thank you very much for the kind questions and suggestions. Firstly, we  
514 repeated the biological safety of LGG-MHS. The tumor tissues and major organs of  
515 4T1 tumor-bearing mice were homogenized and smeared at different time points after  
516 injection of the LGG-MHS (1, 3, 7, 30 d). Afterwards, we quantified LGG based on  
517 the number of colonies in MRS agar plates and the weight of the tissue before  
518 homogenization. The results showed that the heart, spleen, lung and kidney were free  
519 of LGG growth except for minor LGG residues in the liver after 30 days of LGG-  
520 MHS nanosystem injection (**Supplementary Fig. 7a, b**). The related experimental  
521 results have been provided in the Revised Supplementary Information according to  
522 the reviewer's kind suggestions. (**Supplementary Figure 7, Page 14, Revised**  
523 **Supplementary Information**)

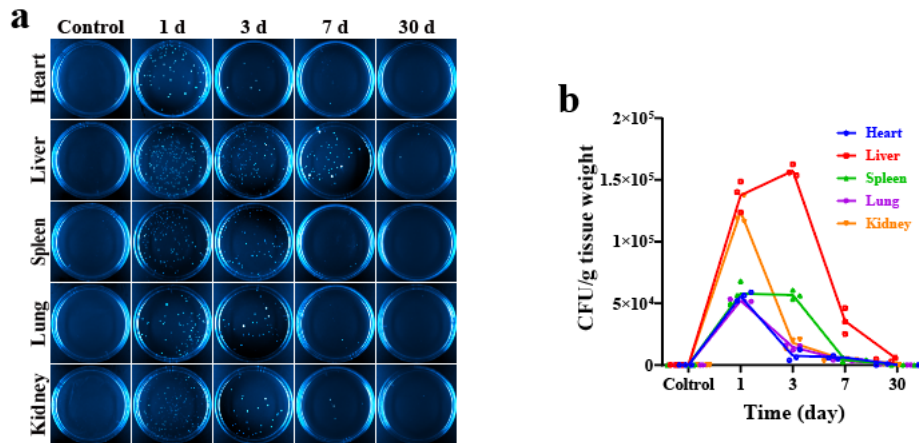

524

525 Supplementary Figure 7. (a) Representative photographs and (b) corresponding CFU count  
 526 analysis of MRS agar plates of bacterial colonization in various organs of healthy mice in a month  
 527 (1, 3, 7 and 30 days) ( $n = 3$ ), Control *i.e.* without any treatment.

528

529 12.- Fig. S19 and S20: I don't see the control groups as claimed in the main text. The  
 530 values seem to change over time – what statistics did the authors use to get the non-  
 531 significance?

532 **Response:** Thank you very much for the kind questions and suggestions. We  
 533 apologize for the difficulty in understanding the inappropriate description. We defined  
 534 the 0 d as the control group (without any treatment), which serves as a reference value  
 535 for comparison with other experimental groups (hematological indicators of mice on  
 536 days 1, 3, 7, and 30 after LGG-MHS injection). Finally, Dunnett's multiple  
 537 comparisons post test was used to test for significance between groups. The analysis  
 538 shows that these values were not statistically significant. We have corrected the labels  
 539 of the diagrams as detailed in Revised Supplementary Information. (**Supplementary**  
 540 **Figure 7, Page 14, Revised Supplementary Information**)

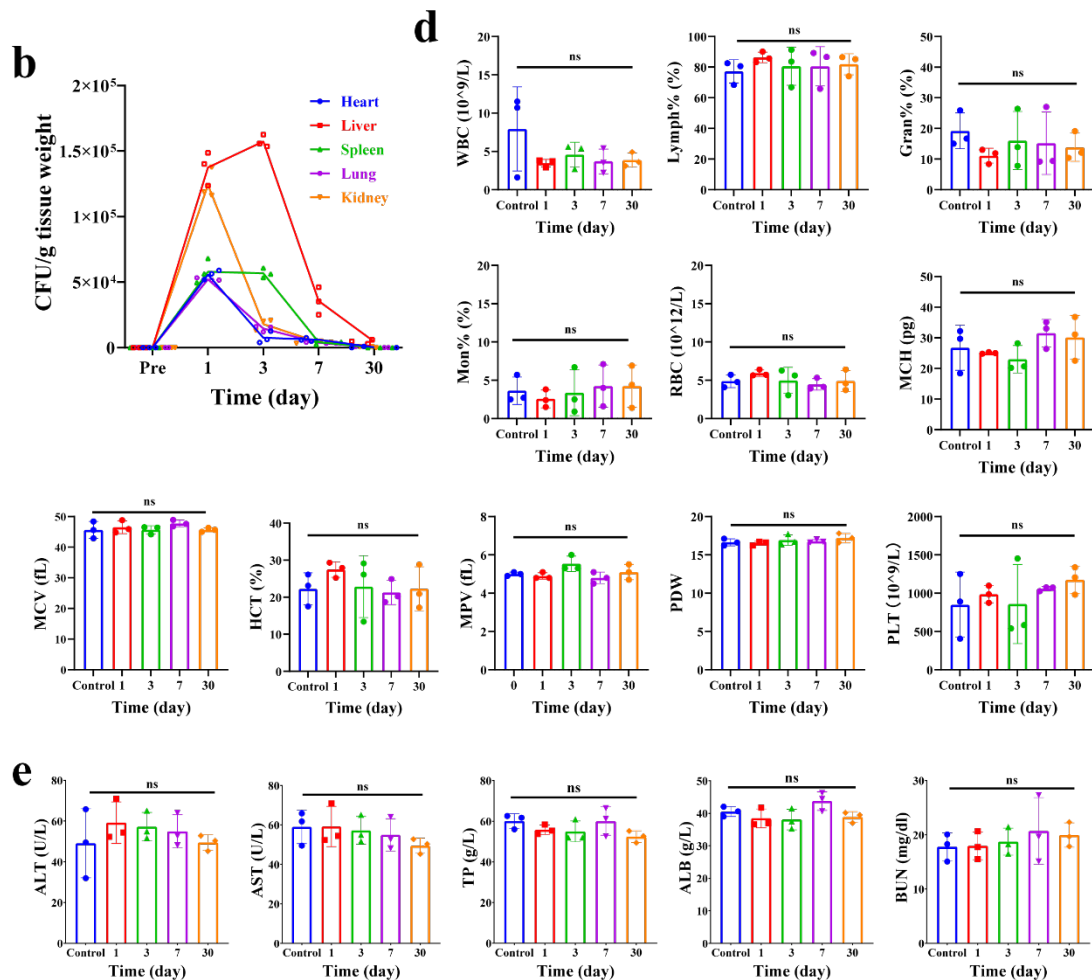

541

542 **Supplementary Figure 7.** (d) *In vivo* hematological indices. Hematological assays of mice at 1, 3,  
 543 7 and 30 days after LGG-MHS injection. Control *i.e.* without any treatment. ( $n = 3$ ). (e) *In vivo*  
 544 liver and kidney function index. Hematological assays of mice at 1, 3, 7 and 30 days after LGG-  
 545 MHS injection ( $n = 3$ ). Control *i.e.* without any treatment. \* $P < 0.05$ , \*\* $P < 0.01$ , \*\*\* $P < 0.001$ ,  
 546 \*\*\*\* $P < 0.0001$ .

547

548 13.- Fig. 6: The authors indicated day 7, 9, 11, and 13 as treatment days. Is this LGG-  
 549 MHS injections? Or is it US treatment? How are LGG-MHS administered?

550 **Response:** Thank you very much for the kind questions. Days 7, 9, 11, and 13 are the  
 551 time points for administering LGG-MHS, while US irradiation is performed on days 8,  
 552 10, 12, and 14. The details of LGG-MHS injection and application of US have added  
 553 in the Revised Manuscript which reads: “4T1 tumor cells ( $1 \times 10^6$ ) were injected into  
 554 the axillary of female Balb/c mice ( $\sim 20$  g) to establish a xenograft tumor model.

555 These mice were divided at random into 8 groups ( $n = 15$ ): control (200  $\mu$ L, PBS),  
556 LGG (200  $\mu$ L, LGG =  $1 \times 10^7$  CFU), MHS (200  $\mu$ L, MHS = 10 mg/kg), LGG-MHS  
557 (200  $\mu$ L, LGG =  $1 \times 10^7$  CFU, MHS = 10 mg/kg), MHS + US (200  $\mu$ L, MHS = 10  
558 mg/kg, US = 1.0 MHz, 1.0 W/cm<sup>2</sup>, 50% duty cycle, 5 min), LGG-MH + US (200  $\mu$ L,  
559 LGG =  $1 \times 10^7$  CFU, MH = 10 mg/kg, US = 1.0 MHz, 1.0 W/cm<sup>2</sup>, 50% duty cycle, 5  
560 min), LGG-MHI + US (200  $\mu$ L, LGG =  $1 \times 10^7$  CFU, MHI = 10 mg/kg, US = 1.0  
561 MHz, 1.0 W/cm<sup>2</sup>, 50% duty cycle, 5 min), LGG-MHS + US (200  $\mu$ L, LGG =  $1 \times 10^7$   
562 CFU, MHS = 10 mg/kg, US = 1.0 MHz, 1.0 W/cm<sup>2</sup>, 50% duty cycle, 5 min). The  
563 above drugs were injected on days 7, 9, 11, and 13, respectively, and the treatment  
564 groups with US application were irradiated with US on days 8, 10, 12, and 14,  
565 respectively. Tumor volume and body weight of mice were measured every 2 days  
566 during days 7-21. Calculate the tumor volume according to the formula (tumor length)  
567  $\times$  (tumor width)<sup>2</sup>/2.” (Line 662-674, Page 22, Revised Manuscript).

568

569 *14- Fig. 8a: The inoculation of secondary tumors at mammary pad isn't strictly*  
570 *metastatic model. I suggest editing the main text.*

571 **Response:** Thank you very much for pointing this issue out. we have added the  
572 following brief description in the Revised Manuscript which reads: “**The immune**  
573 **response against distant tumor.** 4T1 tumor cells ( $1 \times 10^6$ ) were injected into the  
574 second left breast pad of the mice for 7 days as the primary tumor, and the second  
575 right breast pad of each mouse was injected as a distant tumor ( $1 \times 10^6$  of 4T1 cells).”  
576 (Line 693-696, Page 23, Revised Manuscript)

577

## Response to reviewer #2

578

579 *The manuscript by Yu et al describes use of a microbial vector (lactobacillus,*  
580 *LGG) and nanoparticle delivery system (MHS) activated by ultrasound (US)*  
581 *irradiation to target and manipulate the tumour microenvironment (TME). The*  
582 *authors used this approach to boost anti-tumour immunity in two ways by; (1)*  
583 *stimulating reactive oxygen species (ROS) production following US and (2) using*  
584 *LGG to deliver CRISPR/Cas9 gene editing functions to excise indoleamine 2,3*  
585 *dioxygenase-1 (IDO1) genes, which mediate immune suppression via IDO enzyme*  
586 *activity. TME-targeting efficacy was evaluated in a murine breast cancer cell line*  
587 *(4T1) and the 4T1/BALB/c tumour model. Data reported largely support the authors'*  
588 *claims that the LGG/MHS delivery system is an effective method to incite protective*  
589 *anti-tumour immunity. The manuscript is generally well-written but would benefit*  
590 *from increased clarity and focus on key biological findings of potential clinical*  
591 *significance, and reduced emphasis on technical information such as nanoparticle*  
592 *synthesis and validation data (see below).*

593 **Response:** Thank you very much for the positive comment and recommendation.  
594 Please find the following detailed responses to your comments and suggestions.

595

596 Major Points:

597 *1. The Abstract does not clearly convey major findings from the study and would*  
598 *benefit from extensive rewriting to enhance clarity, emphasise significant findings and*  
599 *minimize technical information. In particular, more emphasis should be placed on*  
600 *describing outcomes from experiments conducted using the mouse tumour model, as*  
601 *these data are far more informative than studies performed on cell lines regarding*  
602 *future prospects for clinical translation of the results from this study.*

603 **Response:** Thank you for your kind comments. According to the suggestions, we have

604 rewritten the abstract, which reads “Reprogramming the tumor immunosuppressive  
605 microenvironment is a promising strategy for improving tumor immunotherapy  
606 efficacy. The clustered regularly interspaced short palindromic repeat  
607 (CRISPR)/CRISPR-associated protein 9 system is used to knockdown tumor  
608 immunosuppression-related genes. Therefore, a self-driven multifunctional delivery  
609 vector was constructed to efficiently deliver the CRISPR-Cas9 nanosystem for  
610 indoleamine 2,3-dioxygenase-1 (*IDO1*) knockdown in order to amplify immunogenic  
611 cell death (ICD) and then reverse tumor immunosuppression. *Lactobacillus*  
612 *rhamnosus GG* (LGG) is a self-driven safety probiotic that can penetrate the hypoxic  
613 tumor center, allowing efficient delivery of the CRISPR/Cas9 system to the tumor  
614 region. While LGG efficiently colonizes the tumor area, and it also stimulates the  
615 organism to activate the immune system. The CRISPR/Cas9 nanosystem can generate  
616 abundant reactive oxygen species (ROS) under the ultrasound irradiation, resulting in  
617 ICD, while the produced ROS can induce endosomal/lysosomal rupture and then  
618 releasing Cas9/sgRNA to knock down the *IDO1* gene to lift immunosuppression. The  
619 system generates powerful immune responses that effectively attack tumor cells in  
620 mice, contributing to the inhibition of tumor metastasis *in vivo*. In addition, this  
621 strategy provides a powerful immunological memory effect which offers protection  
622 against tumor re-challenge after elimination.” (Line 26-41, Page 1-2, Revised  
623 **Manuscript**)

624

625 2. *The initial description of the nanoparticle delivery system in the Introduction is*  
626 *confusing (lines 86-103). In particular, the meaning of the acronym MHS needs*  
627 *clarifying, as does the purpose of using ZIF8 and HMME in the strategy used in this*  
628 *study. The graphic depicting study goals (Fig. 1) helps but is far too complicated. This*  
629 *graphic should be simplified to focus exclusively on key elements of the strategy*  
630 *employed in the study; in other words, make it into a graphic hypothesis.*

631 **Response:** Thank you very much for your kind comments and constructive

632 suggestions. Thank you very much for your kind comments and constructive  
633 suggestions. The MHS consists of M (ZIF-8), H (sonosensitizer, HMME) and S  
634 (Cas9/sgRNA), and ZIF-8 and HMME serve the following purposes:

635 (1) ZIF-8: Zeolitic imidazolinium framework (ZIF-8) is a metal-organic  
636 framework with a large specific surface area, tailored pore size, pre-designed  
637 morphology, biocompatibility and controlled degradability that brings such materials  
638 closer to pharmaceutical and medical translation, allowing them to be used as an  
639 excellent non-viral CRISPR/Cas9 delivery system.<sup>19-22</sup> HMME and Cas9/sgRNA are  
640 delivered into tumor cells *via* ZIF-8, and Cas9/sgRNA rapidly escapes from  
641 endosomes/exosomes *via* the proton-sponge effect, thus enabling effective gene  
642 editing.<sup>23,24</sup>

643 (2) HMME: HMME was used as sonosensitizer to generates abundant ROS to  
644 damage cancer cells upon US irradiation, while the generated ROS induce lysosomal  
645 rupture to release Cas9/sgRNA, setting the stage for its next step of gene editing.  
646 HMME, an organic acoustic sensitizer, leads to higher ROS and therefore produces a  
647 more adequate SDT efficiency compared to inorganic acoustic sensitizers.<sup>25-27</sup> More  
648 importantly, HMME has been approved by the FDA for clinical use because of its  
649 high safety profile as an sensitizer.<sup>28</sup> A more important point is that in our strategy  
650 of synergistic immunotherapy strategy, HMME generates abundant ROS to damage  
651 cancer cells upon US irradiation, while the generated ROS induce  
652 endosomal/lysosomal rupture to release Cas9/sgRNA, disrupting oxidative stress  
653 defense and facilitating the release of Cas9/sgRNA into the cytoplasm, setting the  
654 stage for its next step of gene editing.

655 We have re-edited part of the introduction to explain the role of each component  
656 separately to make it easier for the reader to understand our study, which reads  
657 “Zeolitic imidazolinium framework (ZIF-8) is a metal-organic framework (MOF)  
658 with a large specific surface area, tailored pore size, pre-designed morphology,  
659 biocompatibility and controlled degradability that bring such materials closer to



660 pharmaceutical and medical translation<sup>36</sup>. Hence, ZIF-8 (M) was used as an excellent  
661 non-viral CRISPR/Cas9 delivery vehicle for delivery of the sonosensitizer  
662 hematoporphyrin monomethyl ether (H) and CRISPR/Cas9 system (S), which named  
663 as MHS.” (Line 98-103, Page 3-4, Revised Manuscript).

664 In addition, we have simplified Figure 1 to make it easier for the reader to  
665 understand. (Page 29, Revised Manuscript)

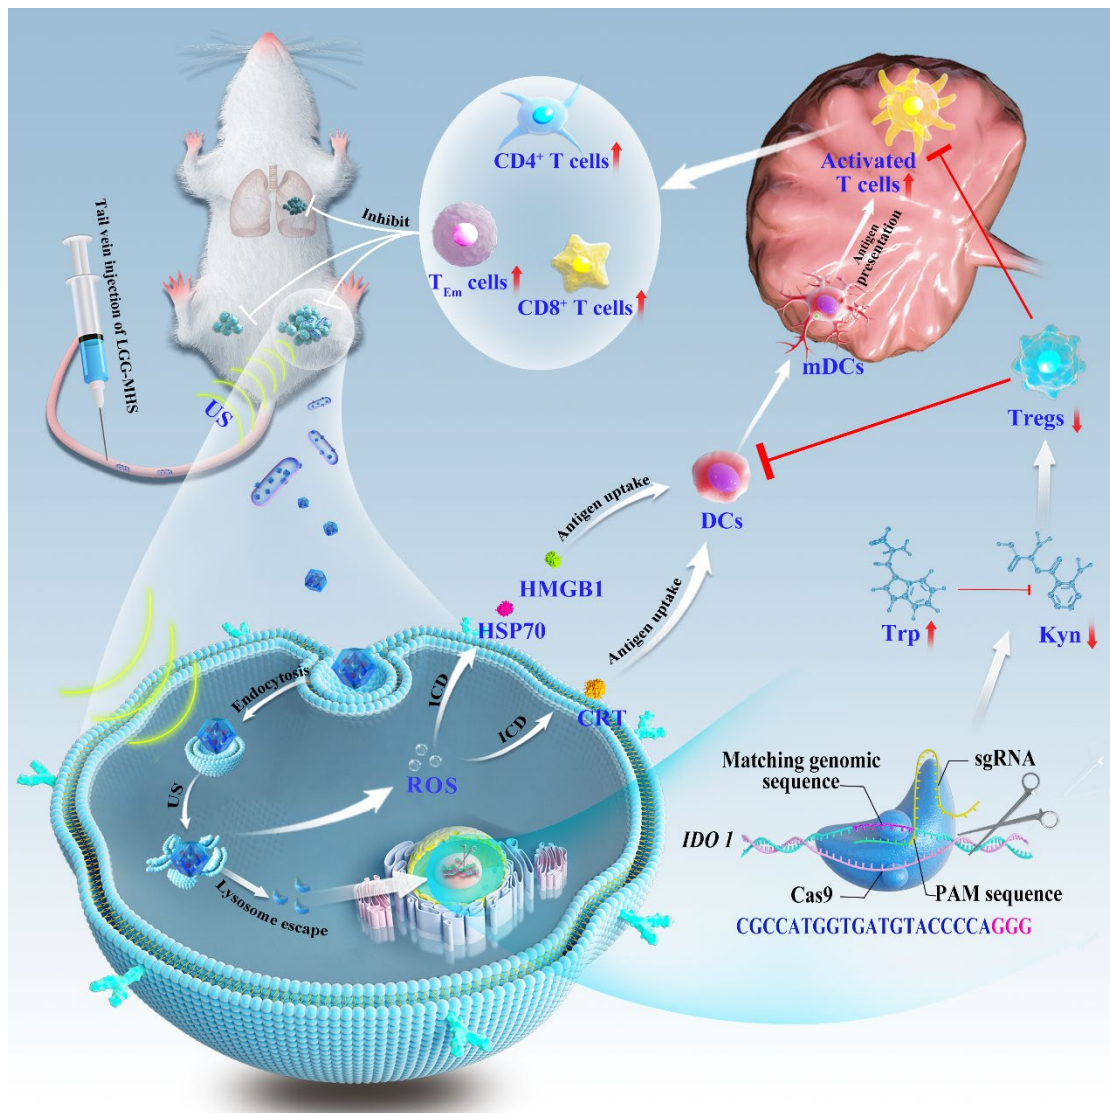

666

667 **Fig. 1. Schematic of the LGG-MHS nanosystem delivery of CRISPR/Cas9 system for**  
668 **reprogrammed the TIME *via* activation of immune response. The use of a US-triggered**  
669 **Cas9/sgRNA delivery system improved the efficiency of delivering Cas9/sgRNA to the nucleus of**  
670 **tumor cells for gene editing.**



671

672 3. The authors do not justify their choice of the 4T1 tumor model. Most importantly, is  
673 the 4T1 model dependent on IDO activity for optimal 4T1 tumor growth? If not, this  
674 undermines the strategy used and prompts the use of a tumor model known to be  
675 dependent on IDO for optimal growth (eg. the LLC tumor model). Linked to this key  
676 point, what is the authors' rationale for administering treatments when 4T1 tumours  
677 were 200mm<sup>3</sup>?

678 **Response:** Thank you very much for your kind comments and question. Researches  
679 have shown that *IDO1/TDO2* expression in the Cancer Genome Atlas (TCGA)  
680 database is upregulated in TNBC compared to normal breast and skin tissue<sup>59</sup>. It have  
681 reported that inhibition of IDO function or reduction of Kyn production in 4T1 tumor-  
682 bearing mice can effectively inhibit the 4T1 tumor growth<sup>60-62</sup>. Therefore, it can be  
683 concluded that *IDO1* is indeed overexpressed and closely associated with  
684 tumorigenesis/progression in 4T1. IDO reduction and inhibition enhances  
685 immunotherapy efficacy<sup>63, 64</sup>.

686 In addition, we injected *IDO1* knockdown/overexpressing 4T1 cells into mouse  
687 mammary pads to construct an *IDO1* knockdown/overexpressing Balb/c mouse  
688 models, and monitored the tumor size from day 7-21 after injection. At the end of  
689 monitoring, mice were euthanized and tumor tissue was collected for IDO protein  
690 fluorescence staining and fluorescence quantification. The results show that the  
691 results indicate that overexpression of *IDO1* significantly promotes the development  
692 of the breast cancer (**Supplementary Fig. 1**). Therefore, *IDO1* is a potential target for  
693 4T1 tumor therapy, which is promising to inhibit the growth in 4T1 by  
694 downregulating *IDO1* levels. The related data and discussion have been added in the  
695 Revised Supporting Information. (**Supplementary Figure 1, Page 7, Revised**  
696 **Supplementary Information**).

697 Taken together, *IDO1* is a potential therapeutic target for 4T1 tumor. In this

698 regard, we have added the following brief explanation in the Revised Manuscript,  
699 which reads “The Cancer Genome Atlas (TCGA) database analysis reveals that the  
700 expression level of *IDO1* is significantly upregulated in triple-negative breast cancer  
701 (TNBC) compared to normal breast tissue. Then, to explore the correlation between  
702 the expression level of *IDO1* and the development of TNBC, we constructed stable  
703 overexpression of *IDO1* and stable interference with *IDO1* in 4T1 cell lines and  
704 constructed xenograft tumor models. The results indicate that overexpression of *IDO1*  
705 significantly promotes the development of breast cancer (**Supplementary Figure 1**).  
706 Therefore, reducing the expression level of *IDO1* contributed to inhibit the  
707 proliferation of breast cancer. Accordingly, the CRISPR/Cas9 nanosystem developed  
708 in this research can efficiently enrich the tumor region under probiotic drive and can  
709 precisely and controllably knock down *IDO1* under ultrasound, avoiding the lack of  
710 targeting and drug resistance of traditional inhibitors.” (**Line 490-499, Page15-16,**  
711 **Revised Manuscript**)

712 We apologize for the typographical error in the manuscript, as shown in Figure 6  
713 and Figure 8, we started treatment of the mice on day 7 after 4T1 tumor cell injection  
714 with the tumor volume was approximately 60-80 mm<sup>3</sup>. We made the following  
715 corrections to the manuscript, which reads “Mice were randomly divided into 8  
716 groups once the tumor volume reached an approximate size of 60~80mm<sup>3</sup>, which  
717 including Control, LGG, MHS, LGG-MHS, MHS + US, LGG-MH + US, LGG-MHI  
718 + US and LGG-MHS + US, and were treated on days 7-14.” (**Line 359-361, Page 11,**  
719 **Revised Manuscript**)

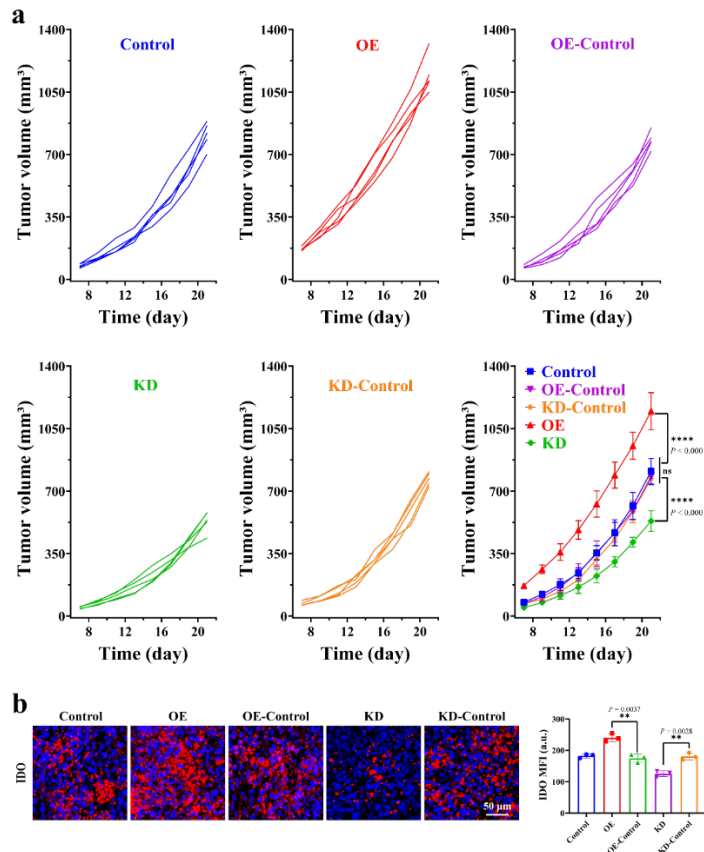

720

721 **Supplementary Figure 1.** (a) Separate and integrated tumor growth curves ( $n = 5$ ) and (b) Images  
 722 of IDO immunofluorescence staining and corresponding mean fluorescence intensity of 4T1  
 723 tumor-bearing mouse after being treated Control (without treating), OE (*IDO1* over expression  
 724 plasmid), OE-Control (Untreated plasmid for OE), KD (*IDO1* knock down plasmid), KD-Control  
 725 (Untreated plasmid for KD). DAPI was used to stain the nucleus of the cell (blue), and the IDO  
 726 was stained with anti-IDO antibodies (red). ( $n = 3$ ) \* $P < 0.05$ , \*\* $P < 0.01$ , \*\*\* $P < 0.001$ , \*\*\*\* $P <$   
 727  $0.0001$ .

728

729 4. The authors must assess IDO enzyme activity by measuring kynurenine levels in the  
 730 TME and draining lymph nodes to evaluate if their treatment strategy reduces  
 731 nominal levels of IDO enzyme activity that may promote immune suppression required  
 732 for optimal tumour growth. Note that assessing (1) *IDO1* protein expression or (2)  
 733 Trp levels are not sufficient to measure IDO activity in the TME. Linked to this point,  
 734 the authors should test if IDO inhibitors synergise with their nanoparticle approach to  
 735 boost immune activation to assess if IDO inhibitors or LGG-CRISPR/cas9 gene  
 736 editing is more effective in reducing IDO activity.

737 **Response:** Thank you for your constructive suggestions, which will help improve the  
738 rigor of our study. We added LGG in combination with MH and IDO inhibitor (LGG-  
739 MHI + US) groups to the animal model grouping to compare whether CRIPR is more  
740 effective than IDO inhibitors in inhibiting tumor growth. Further, we examined the  
741 levels of Trp and Kyn in the primary tumor and tumor draining lymph nodes to assess  
742 the activity of IDO. The related data have been supplemented in the Revised  
743 Manuscript, as shown in Revised Manuscript Figure 6d-e and g-h, we detected similar  
744 levels of Trp and Kyn, and slightly different IDO fluorescence intensities in the LGG-  
745 MHI+US and LGG-MHS+US groups, indicating that IDO inhibitors are similar to  
746 CRISPR/Cas9 in inhibiting the activity of IDO proteins in primary tumors within a  
747 short period of time. However, combined with our monitoring of tumor size and study  
748 of tumors (**Figures 6b, c**), we found that the nanoplatform combined with IDO  
749 inhibitors was therapeutically effective in eliminating primary tumor growth to some  
750 extent (2/5), but its efficacy was inferior to that of CRISPR/Cas9 (4/5). Furthermore,  
751 mice were re-challenged on day 60 by subcutaneous implantation of 3× 4T1 cells into  
752 the left axilla (**Figure 6a**). For surviving mice that had been treated with LGG-MHS +  
753 US, the second tumor challenge was rejected at a rate of 100%. Although mice treated  
754 with LGG-MHI + US initially showed a 2/5 survival rate, tumor progression was  
755 observed after tumor re-challenge, indicating inefficient development of adaptive  
756 immune responses against 4T1 cells (**Figure 6i**). These results suggest that while the  
757 IDO inhibitor combination LGG exhibited anti-tumor activity under US exposure, it  
758 was less effective than CRISPR/Cas9 in triggering durable immunity. In addition,  
759 CRISPR showed superior tumor suppression compared to IDO inhibitors in  
760 suppressing distal and pulmonary metastases (**Figures 8**). This may be due to the  
761 resistance of the organism to small molecule inhibitors.<sup>59</sup>

762

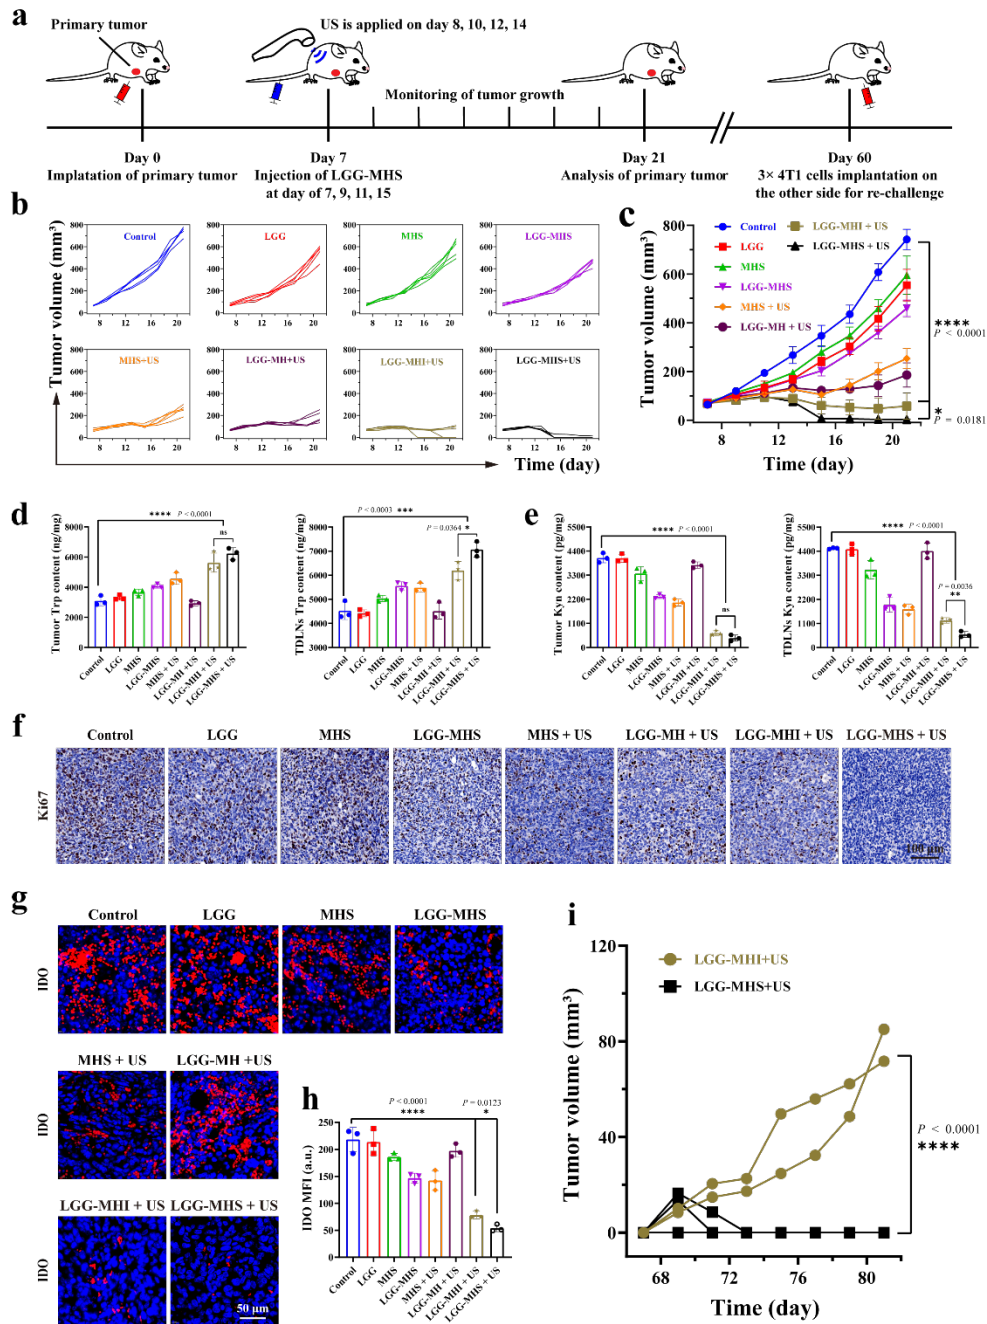

763

764 **Fig. 6 LGG-MHS + US against 4T1 tumor *in vivo*.** (a) Schematic diagram of primary tumor  
 765 treatment process *in vivo*. (b) Tumor growth curves of 4T1 after being treated by PBS, LGG, MHS,  
 766 LGG-MHS, MHS + US, LGG-MH + US, LGG-MHI + US and LGG-MHS + US ( $n = 5$ ). (c)  
 767 Average tumor growth curves in different groups ( $n = 5$ ). (d) HPLC assay of the Trp content in  
 768 primary tumors and TDLNs of tumor-bearing mice after different treatments ( $n = 3$ ). (e) Elisa  
 769 assay Kyn content in primary tumors and TDLNs of tumor-bearing mice after different treatments  
 770 ( $n = 3$ ). (f) Antigen Ki-67 staining in tumor sections from each experiment group ( $n = 3$ ). (g)  
 771 Images and (h) corresponding fluorescence intensity of IDO immunofluorescence staining in  
 772 primary tumors of 4T1 tumor-bearing mice after various treatments. DAPI was used to stain the  
 773 nucleus of the cell (blue), and the IDO was stained with anti-IDO antibodies (red) ( $n = 3$ ). (i)  
 774 Average tumor growth curves after being treated by re-challenge. ( $n_{LGG-MHI+US} = 2, n_{LGG-MHS+US}$   
 775  $= 4$ )

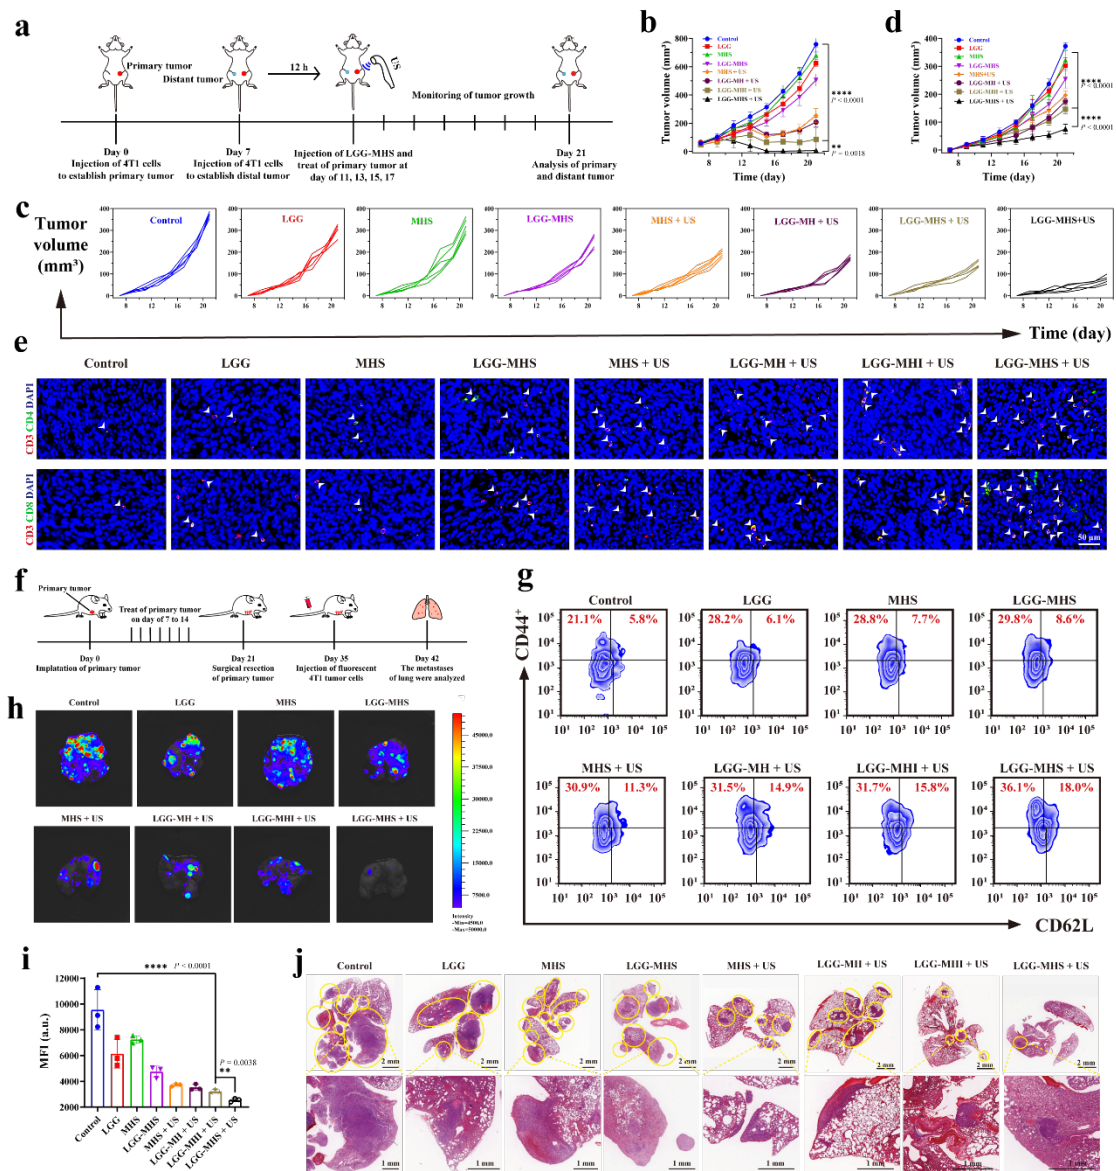

778 **Fig. 8 Anti distal tumor effect and immunological memory of LGG-MHS + US in the 4T1**  
 779 **bearing mice model.** (a) Schematic diagram of the establishment of distal tumors model and the  
 780 experimental procedure of treatment. (b) Average tumor growth curves of primary tumor in  
 781 different groups ( $n = 5$ ).  $*P < 0.05$ ,  $**P < 0.01$ ,  $***P < 0.001$ ,  $****P < 0.0001$ . (c) Mean growth  
 782 curves and (d) corresponding growth curves of distant tumors in different groups ( $n = 5$ ).  $*P <$   
 783  $0.05$ ,  $**P < 0.01$ ,  $***P < 0.001$ ,  $****P < 0.0001$ . (e) Immunofluorescence images of helper T  
 784 lymphocytes ( $CD3^+CD4^+$ ) and proliferated cytotoxic T lymphocytes ( $CD3^+CD8^+$ ) in 4T1 tumor  
 785 tissue slices of distal tumor ( $n = 3$ ). (f) Schematic diagram of the establishment and treatment  
 786 process of mouse models of lung metastasis. (g) Typical flow cytometric of the effector memory T  
 787 cells ( $CD3^+CD8^+CD44^+CD62L^-$ ) (Tem) and ( $CD3^+CD8^+CD44^+CD62L^+$ ) (Tcm) in the spleen after  
 788 24 h after the first different treatments ( $n = 3$ ). (h) Bioluminescence images and (i) corresponding  
 789 fluorescence intensity quantification of lung metastatic nodules of the 4T1 tumors ( $n = 3$ ). (j) HE  
 790 staining of lung tissue from different groups of 4T1 tumor-bearing mice. The nodules with yellow  
 791 circles in the section diagram indicate metastases in the lungs.



792

793 *5. Data reported in Fig6 & Fig8 support the authors' conclusion that LGG-MHS+US*  
794 *treatments reduced primary and distal 4T1 tumor burdens at experimental endpoints*  
795 *(day 21). MHS+US treatments also reduced tumor burdens, though to a lesser extent.*  
796 *These outcomes suggest that combining LGG with MHS/US nanotherapy may fully*  
797 *protect against 4T1 tumor growth but more studies will be necessary to support this*  
798 *claim rigorously, in particular with regard to if IDO1 gene editing is critical to*  
799 *promote protective outcomes (see point 4). Accordingly, the authors should assess*  
800 *mouse survival over longer periods and test if LGG infection or IDO1 gene editing*  
801 *(or both) contribute to increased protection from 4T1 tumor growth, as well as*  
802 *evaluating IDO enzyme activity (see point 4).*

803 **Response:** Thank you for your constructive suggestions, which will help to improve  
804 the rigor of our research. According to reviewer's suggestion, we added the LGG-MH  
805 + US group to the animal models to explore the contribution made by *IDO1*  
806 knockdown to inhibit tumor growth, and the related data have been supplemented in  
807 the Revised Manuscript and Revised Supplementary Information, as shown in  
808 Revised Manuscript Figure 6, the tumors of mice in the LGG-MH + US group did not  
809 differ much from MHS+US, and simply inhibited tumor growth more mildly.

810 In addition, after referring to the extensive literature, we extended the survival  
811 assessment of surviving mice in the LGG-MHI + US group and LGG-MHS + US  
812 group to 60 days and reinoculated  $3 \times 4T1$  cells into the left axilla on day 60 to verify  
813 the ability of surviving mice to reject re-challenge. The related data have been  
814 supplemented in the Revised Supplementary Information and Revised Manuscript,  
815 which reads: "For the survivors that had been treated with LGG-MHS + US, the  
816 second tumor challenge was rejected at a 100% rate. Though animals treated with the  
817 LGG-MHI + US initially demonstrated 2/5 survival rate, all with tumor progression  
818 observed after the tumor re-challenge, indicating inefficient development of an  
819 adaptive immune response against 4T1 cells. These results show that, while IDO



820 inhibitor combination LGG exhibits antitumor activity under the US exposure, it is  
 821 not as efficient as the CRISPR/Cas9 at eliciting long-lasting immunity.” (Line 397-  
 822 403, Page 12-13, Revised Manuscript and Supplementary Figure 9b, Page16,  
 823 Revised Supplementary Information)

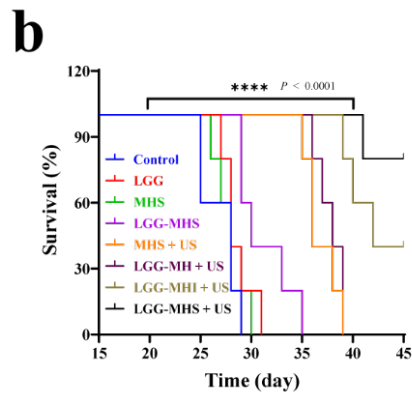

824

825 **Supplementary Figure 9.** (b) survival curves of 4T1-tumor-bearing mice with different treatment  
 826 (control, US only, MH, MH + US, MHS, and MHS + US) ( $n = 5$ ).  $*P < 0.05$ ,  $**P < 0.01$ ,  $***P <$   
 827  $0.001$ ,  $****P < 0.0001$ .

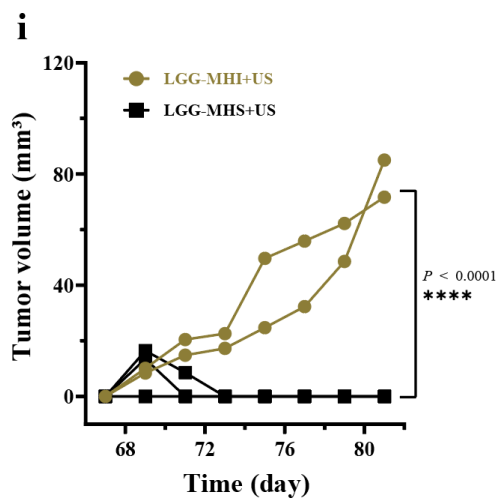

828

829 **Fig. 6 LGG-MHS + US against 4T1 tumor *in vivo*.** (i) Average tumor growth curves after being  
 830 treated by re-challenge. ( $n_{\text{LGG-MHI+US}} = 2$ ,  $n_{\text{LGG-MHS+US}} = 4$ )

831

832 6. The tumor re-challenge strategy depicted in Fig8h indicates that primary 4T1

833 *tumors were surgically resected on day 21. It is not clear why tumors were resected.*  
834 *Tumor re-challenge should be conducted by injecting 4T1 tumor cells into mice that*  
835 *survive primary 4T1 tumor growth after therapy without resecting primary tumors*  
836 *prior to re-challenge to evaluate if therapy stimulates durable and stable anti-tumor*  
837 *immunity that clears both primary and secondary tumors.*

838 **Response:** Thank you very much for the constructive suggestions, which are highly  
839 appreciated. Our results above showed that most groups of tumor-bearing mice  
840 survived less than 60 days with different treatments. In order to explore the long-term  
841 immunological memory effect of treated mice, we had to extend the survival period of  
842 the mice. Therefore, at the termination of treatment on day 21, we performed tumor  
843 resection on all mice with tumors still present.

844 According to reviewer's suggestion, we have improved the experimental  
845 protocol of primary tumor model. Survival assessment of surviving mice were  
846 extended the in the LGG-MHI and LGG-MHS groups and reinoculated 4T1 cells two  
847 weeks after the end of treatment (day 60) to exploring the ability to anti-rechallenge  
848 of treated mice. Though animals treated with the LGG-MHI + US initially  
849 demonstrated 2/5 survival rate, all with tumor progression observed after the tumor  
850 re-challenge, indicating inefficient development of an adaptive immune response  
851 against 4T1 cells. These results show that, while IDO inhibitor combination LGG  
852 exhibits antitumor activity under the US exposure, it is not as efficient as the  
853 CRISPR/Cas9 at eliciting long-lasting immunity. The related data have been  
854 supplemented in the Revised Manuscript. (**Figure 6, Page38-39, Revised**  
855 **Manuscript**)

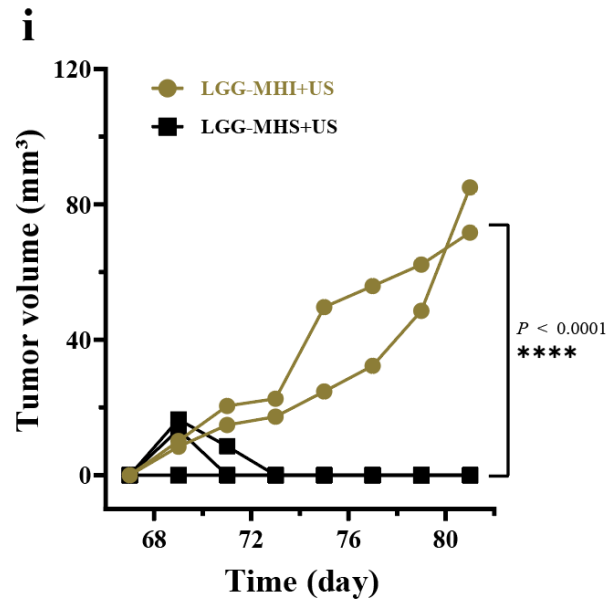

856

857 **Fig. 6 LGG-MHS + US against 4T1 tumor *in vivo*.** (i) Average tumor growth curves after being  
 858 treated by re-challenge. ( $n_{\text{LGG-MHI+US}} = 2$ ,  $n_{\text{LGG-MHS+US}} = 4$ )

859

860 7. The short Discussion (lines 513 – 525) does not adequately describe the relevance  
 861 and significance of the study findings, or place them in the context of the current  
 862 scientific literature. This section needs extensive rewriting to address these  
 863 deficiencies.

864 **Response:** Thank you very much for the constructive suggestions. We have added  
 865 related description and discussion in the Revised Manuscript, which reads:  
 866 “Immunotherapy has become an effective therapeutic modality for tumors instead of  
 867 surgery, radiotherapy, chemotherapy and targeted therapy through activation or  
 868 modulation of the organism immune system. However, due to the existence of tumor  
 869 immunosuppressive microenvironment (hypoxia, low pH, immunosuppressive cell  
 870 infiltration, *etc.*) limits the effectiveness of immunotherapy. In particular, IDO is a  
 871 potential small molecule immune checkpoint which is overexpressed in a variety of  
 872 tumor tissues and serves as an immunosuppressive factor to induce immune tolerance  
 873 and immune escape in the organism's immune system. The Cancer Genome Atlas

874 (TCGA) database analysis reveals that the expression level of *IDO1* is significantly  
875 upregulated in triple-negative breast cancer (TNBC) compared to normal breast tissue.  
876 Then, to explore the correlation between the expression level of *IDO1* and the  
877 development of TNBC, we constructed stable overexpression of *IDO1* and stable  
878 interference with *IDO1* in 4T1 cell lines and constructed xenograft tumor models. The  
879 results indicate that overexpression of *IDO1* significantly promotes the development  
880 of breast cancer. Therefore, reducing the expression level of *IDO1* contributed to  
881 inhibit the proliferation of breast cancer. Accordingly, the CRISPR/Cas9 nanosystem  
882 developed in this research can efficiently enrich the tumor region under probiotic  
883 drive and can precisely and controllably knock down *IDO1* under US irradiation,  
884 avoiding the lack of targeting and drug resistance of traditional inhibitors.

885 In addition, hypoxia plays a crucial role in the tumor immunosuppressive  
886 microenvironment and largely influences the outcome of treatment. Given the critical  
887 role of hypoxia in tumor progression and its resistance to treatment, many efforts have  
888 been made to overcome the limitations associated with hypoxia regarding tumors. In  
889 contrast to traditional strategies of overcoming hypoxia, the present research exploited  
890 the hypoxic microenvironment of tumors and utilized the hypoxia-driven and  
891 colonization properties of LGG as a vector for delivery of the CRISPR/Cas9  
892 nanosystem. After our study, we found that LGG does have an excellent ability to  
893 target the hypoxic microenvironment of tumors. In vivo fluorescence images and  
894 semi-quantitative analysis indicate that the fluorescent intensity of Cy5.5 at the tumor  
895 site increased over time after intravenous injection of LGG-Cy5.5 and LGG-MHS-  
896 Cy5.5, revealing superior tumor targeting properties of the LGG-MHS complex.  
897 Meanwhile, it has been revealed that LGG is not only a vehicle but also a synergistic  
898 therapeutic adjuvant. LGG can inhibit tumor cell growth and metastasis by activating  
899 the immune response through certain specific pathways and increasing the infiltration  
900 of immune cells in the tumor microenvironment.

901 The system generates powerful immune responses that effectively attack tumor  
902 cells in mice, contributing to the inhibition of tumor metastasis *in vivo*. In addition,

903 this strategy provides a powerful immunological memory effect which offers  
904 protection against tumor re-challenge after elimination. In summary, a self-driven  
905 probiotic delivery system for CRISPR/Cas9 was constructed in order to reprogram the  
906 TIME and then inhibit metastasis and recurrence of breast cancer. This system  
907 employs *Lactobacillus rhamnosus* as a carrier for the efficient delivery of the  
908 CRISPR/Cas9 nanosystem to knock down *IDO1*, reduce immunosuppressive cells  
909 infiltration, and activate intrinsic immunity by regulating signaling pathways  
910 associated with immune response and apoptosis. Meanwhile, the system is triggered  
911 by US to improve gene editing efficiency and induce ICD, while the molecular  
912 damage-related proteins released during ICD are taken up by immature DCs as  
913 antigens to promote their maturation and thus upregulation of killer T cells. Immune  
914 cells are efficiently activated through this cocktail therapy to eliminate the primary  
915 tumor and inhibit its metastasis and recurrence. This research not only reprogram the  
916 TIME with multiple pathways to activate the immune system against tumors, but also  
917 developed a synergistic gene editing therapeutic modality based on a unique  
918 CRISPR/Cas9 gene delivery technology, which is undoubtedly crucial for further  
919 clinical applications of gene editing technology *in vivo*.” (Line 483-530, Page 15-17,  
920 **Revised Manuscript**)

921

922 **Minor Point:**

923 *1. The large number of supplemental figures (33) make the manuscript difficult to*  
924 *read. The authors should consult with the editors to find ways to streamline this large*  
925 *set of supplemental figures.*

926 **Response:** Thank you very much for pointing this issue out. We have rearranged the  
927 supplementary figures (12) to make them easier to read and understand.

928

929

### Response to reviewer #3

930 *The paper entitled “Self-driven Probiotic-CRISPR/Cas9 Nanosystem Reprogramming*  
931 *of Tumor Immunosuppressive Microenvironment to Enable Sono-immunometabolic*  
932 *Cancer Therapy” is reporting the use of a multifunctional immunotherapeutic system*  
933 *for solid tumor treatment. They loaded the sonosensitizer hematoporphyrin*  
934 *monomethyl ether (HMME) and CRISPR/CAS9 on ZIF-8 (MHS) and combined them*  
935 *with Lactobacillus rhamnosus GG (LGG) for enhancing immunotherapy efficacy.*  
936 *LGG bacteria was used as a carrier for in vivo study to increase the targetability of*  
937 *the system toward tumors. The system consisted of ZIF-8 which was used as a vector*  
938 *to protect Cas9/sgRNA, HMME was used to generate ROS under ultrasound*  
939 *irradiation (US) to induce lysosomal rupture and release Cas9/sgRNA which is*  
940 *intended to knock down the IDO1 gene and promote immunogenic cell death (ICD).*  
941 *They tested the efficacy of the system in both, in vitro and in vivo. It is evident that*  
942 *they tried to evaluate the efficiency of their system using different experimental*  
943 *approaches. While the in vivo results looked promising, they did not provide a clear*  
944 *conclusion about the advantage of each individual component of the system and its*  
945 *role in the success of the treatment. They lack many control experiments which made*  
946 *the data presented inexplicit. Therefore, acceptance can be recommended at this stage.*  
947 *The following comments need to be addressed to have a better understanding of their*  
948 *system.*

949 **Response:** Thank you very much for your kind comments. We have clarified in the  
950 discussion section of the Revised Manuscript about the advantages of each component  
951 of our LGG-MHS nanosystem, which reads: “Immunotherapy has become an  
952 effective therapeutic modality for tumors instead of surgery, radiotherapy,  
953 chemotherapy and targeted therapy through activation or modulation of the organism  
954 immune system. However, due to the existence of tumor immunosuppressive  
955 microenvironment (hypoxia, low pH, immunosuppressive cell infiltration, etc.) limits  
956 the effectiveness of immunotherapy. In particularly, IDO is a potential small molecule

957 immune checkpoint which is overexpressed in a variety of tumor tissues and serves as  
958 an immunosuppressive factor to induce immune tolerance and immune escape in the  
959 organism's immune system. The Cancer Genome Atlas (TCGA) database analysis  
960 reveals that the expression level of *IDO1* is significantly upregulated in triple-  
961 negative breast cancer (TNBC) compared to normal breast tissue. Then, to explore the  
962 correlation between the expression level of *IDO1* and the development of TNBC, we  
963 constructed stable overexpression of *IDO1* and stable interference with *IDO1* in 4T1  
964 cell lines and constructed xenograft tumor models. The results indicate that  
965 overexpression of *IDO1* significantly promotes the development of breast cancer.  
966 Therefore, reducing the expression level of *IDO1* contributed to inhibit the  
967 proliferation of breast cancer. Accordingly, the CRISPR/Cas9 nanosystem developed  
968 in this research can efficiently enrich the tumor region under probiotic drive and can  
969 precisely and controllably knock down *IDO1* under US irradiation, avoiding the lack  
970 of targeting and drug resistance of traditional inhibitors.

971 In addition, hypoxia plays a crucial role in the tumor immunosuppressive  
972 microenvironment and largely influences the outcome of treatment. Given the critical  
973 role of hypoxia in tumor progression and its resistance to treatment, many efforts have  
974 been made to overcome the limitations associated with hypoxia regarding tumors. In  
975 contrast to traditional strategies of overcoming hypoxia, the present research exploited  
976 the hypoxic microenvironment of tumors and utilized the hypoxia-driven and  
977 colonization properties of LGG as a vector for delivery of the CRISPR/Cas9  
978 nanosystem. After our study, we found that LGG have an excellent ability to target  
979 the hypoxic microenvironment of tumors. In vivo fluorescence images and semi-  
980 quantitative analysis indicate that the fluorescent intensity of Cy5.5 at the tumor site  
981 increased over time after intravenous injection of LGG-Cy5.5 and LGG-MHS-Cy5.5,  
982 revealing superior tumor targeting properties of the LGG-MHS complex. Meanwhile,  
983 it has been revealed that LGG is not only a vehicle but also a synergistic therapeutic  
984 adjuvant. LGG can inhibit tumor cell growth and metastasis by activating the immune



985 response through certain specific pathways and increasing the infiltration of immune  
986 cells in the tumor microenvironment.

987 The system generates powerful immune responses that effectively attack tumor  
988 cells in mice, contributing to the inhibition of tumor metastasis *in vivo*. In addition,  
989 this strategy provides a powerful immunological memory effect which offers  
990 protection against tumor re-challenge after elimination. In summary, a self-driven  
991 probiotic delivery system for CRISPR/Cas9 was constructed in order to reprogram the  
992 TIME and then inhibit metastasis and recurrence of breast cancer. This system  
993 employs *Lactobacillus rhamnosus* as a carrier for the efficient delivery of the  
994 CRISPR/Cas9 nanosystem to knock down *IDO1*, reduce immunosuppressive cells  
995 infiltration, and activate intrinsic immunity by regulating signaling pathways  
996 associated with immune response and apoptosis. Meanwhile, the system is triggered  
997 by US to improve gene editing efficiency and induce ICD, while the molecular  
998 damage-related proteins released during ICD are taken up by immature DCs as  
999 antigens to promote their maturation and thus upregulation of killer T cells. Immune  
1000 cells are efficiently activated through this cocktail therapy to eliminate the primary  
1001 tumor and inhibit its metastasis and recurrence. This research not only reprogram the  
1002 TIME with multiple pathways to activate the immune system against tumors, but also  
1003 developed a synergistic gene editing therapeutic modality based on a unique  
1004 CRISPR/Cas9 gene delivery technology, which is undoubtedly crucial for further  
1005 clinical applications of gene editing technology *in vivo*.” (Line 483-530, Page 15-17,  
1006 **Revised Manuscript**)

1007 We apologize for the absence of many control experiments, and we have added  
1008 the appropriate control experiments for your concerns, please find the following  
1009 detailed responses.

1010

1011 1. For the construct assembly, it was not clear how HMME was loaded into ZIF-8.

1012 *What type of interaction is happening? The same for Cas9/sgRNA, did it infiltrate*  
1013 *ZIF-8 or did they form a complex?*

1014 **Response:** Thanks very much for your kind question. Metal-organic frameworks  
1015 (MOFs), consisting of metal or cluster nodes linked by organic ligands, have emerged  
1016 as a promising platform for biomedical applications due to their highly porous  
1017 structure, friendliness to various functionalization methods, and excellent  
1018 biocompatibility and biodegradability<sup>60, 61</sup>.

1019 There are mainly three methods for various drugs/large/small molecules binding  
1020 to MOFs: grafting, permeation and encapsulation<sup>20</sup>. It has been reported that  
1021 biomacromolecules such as enzymes may be encapsulated within MOFs *via* two  
1022 general strategies: by assembling the MOF around the enzyme (which term *de novo*  
1023 encapsulation) or by introducing the enzyme into the pre-existing MOF (which term  
1024 *post-synthetic* encapsulation). Zinc 2-methylimidazole (ZIF-8), a nanoscale metal –  
1025 organic framework with excellent biocompatibility, has unique features in  
1026 biomacromolecules condensing and chemical drug-loading efficiency due to its  
1027 positive charge and high surface ratio. More importantly, the acidic environment of  
1028 endosomes and/or lysosomes can trigger the degradation of ZIF-8 hosts, which can  
1029 facilitate cargo escape from endosomes and/or lysosomes to the cytosol<sup>61, 62</sup>.

1030 Our strategy firstly employs one-step encapsulation approach to encapsulate  
1031 HMME into the interior of ZIF-8. The HMME was dropwise into the  
1032 dimethylimidazole solution stirred for 10 min before the addition of zinc nitrate  
1033 hexahydrate. The material after encapsulating HMME with ZIF-8 (MOF) is named  
1034 MH. Second, MH was incubated with Cas9/sgRNA to form MHS. The detailed MHS  
1035 experimental procedure and results been provided in the Revised Manuscript  
1036 according to the reviewer's kind question, which reads: "Hematoporphyrin  
1037 monomethyl ether (HMME, 200  $\mu$ L, 2 mg/mL) was slowly added to 2-  
1038 methylimidazole solution under mechanical stirring at room temperature, and after 10  
1039 min, zinc nitrate solution was added dropwise. The MH was obtained after stirring for

1040 24 h at room temperature. Then, the MH and CRISPR/Cas9 system (mass ratio 4:1)  
1041 were incubated at 37 ° C according to the methodology instructions, finally, the  
1042 integration of MHS nanosystem was constructed.” (Line 569-574, Page 19, Revised  
1043 **Manuscript**) In summary, HMME is encapsulated into the interior of ZIF-8 during  
1044 the synthesis process. In contrast, Cas9/sgRNA is partially internalized into the  
1045 interior of MH and partially grafted onto the surface of MH after incubation with MH,  
1046 resulting in MHS.

1047

1048 2. *The illustration and the terms “loading” and “encapsulation” are not very*  
1049 *accurate. The author claimed the loading/ encapsulation of Cas9/sgRNA into ZIF-8,*  
1050 *however, the reported pore size of ZIF-8 is very small for Cas9/sgRNA to internalize.*

1051 **Response:** Thank you very much for pointing this issue out. Illustrations and term  
1052 have been corrected. It has been reported that biomacromolecules such as enzymes  
1053 may be encapsulated within MOFs *via* two general strategies by assembling the MOF  
1054 around the enzyme (which term *de novo* encapsulation) or by introducing the enzyme  
1055 into the pre-existing MOF (which term *post-synthetic* encapsulation). Zinc 2-  
1056 methylimidazole (ZIF-8), a nanoscale metal - organic framework with excellent  
1057 biocompatibility, has unique features in biomacromolecules condensing and chemical  
1058 drug-loading efficiency due to its positive charge and high surface ratio.. Thus, our  
1059 strategy firstly employs one-step encapsulation approach to encapsulate HMME into  
1060 the interior of ZIF-8. The material after encapsulating HMME with ZIF-8 (MOF) is  
1061 named MH. Second, MH was incubated with Cas9/sgRNA to form MHS. Revised  
1062 Manuscript Figure 2b and Supplementary Figure 2c show that the average pore size of  
1063 MHS decreased relative to ZIF-8, demonstrating that some Cas9/sgRNA penetrated  
1064 into the interior of MH. Revised Manuscript Figure 2e shows that the particle size of  
1065 MHS slightly increases compared to MH, which proves that some Cas9/sgRNA is  
1066 also grafted on the surface of MH. Finally, Revised Manuscript Figure 2d  
1067 demonstrates that the elemental mapping of MHS corresponds to a more dense P-

1068 element compared to ZIF-8 and MH, which further suggests MH was successfully  
1069 loaded with Cas9/sgRNA. Therefore, the final MH and Cas9/sgRNA formed the MHS  
1070 complex.

1071

1072

1073 *3. In figure 2C, how did ZIF-8 maintain its hexagonal structure after combining it*  
1074 *with HMME and CRISPR/CAS9? and the size increase after complexation has to be*  
1075 *justified.*

1076 **Response:** Thank you very much for the kind question and constructive suggestion.  
1077 Our strategy firstly employs one-step encapsulation approach to encapsulate HMME  
1078 into the interior of ZIF-8. The HMME was dropwise into the dimethylimidazole  
1079 solution stirred for 10 min before the addition of zinc nitrate hexahydrate. The  
1080 material after encapsulating HMME with ZIF-8 (MOF) is named MH. Second, MH  
1081 was incubated with Cas9/sgRNA to form MHS. So that the encapsulated HMME still  
1082 maintain their hexagonal structure.

1083 Related studies have shown that the crystalline growth process of ZIF-8 crystals  
1084 includes four processes: nucleation, crystallization, growth, and stabilization<sup>63</sup>. excess  
1085 2-methylimidazole deprotonates and zinc ions coordinate to form nuclei, then the  
1086 nuclei grow rapidly to form ZIF-8 nanocrystal particles, and finally neutral 2  
1087 methylimidazole combined with positively charged ZIF-8 to terminate the reaction.<sup>64</sup>  
1088 It has been shown that the particle size of ZIF-8 increases with the increase of the  
1089 amount of encapsulated material<sup>50, 62</sup>. Because we added MHHE to the  
1090 dimethylimidazole solution before adding zinc nitrate hexahydrate and stirred for 10  
1091 min to prepare MH, the larger nuclei would result in a particle size of MH larger than  
1092 ZIF-8.

1093

1094 4. The elemental mapping (EM) in figure 2i does not correspond to the TEM image of  
1095 LGG-MHS in 2h. It is better to compare it to the elemental mapping of LGG alone  
1096 and compare the EM of MHS to ZIF-8 alone using the same experimental settings.

1097 **Response:** Thank you very much for the kind question and constructive suggestion.  
1098 According to the reviewer's suggestion, we have revalidated TEM characteristics  
1099 under the same conditions. As shown in Fig. 2c, there is no changes in nanoparticles  
1100 morphology of ZIF-8, MH and MHS except for the slightly increase in particle size of  
1101 MH and MHS compared to ZIF-8. The elemental profile corresponds to a denser P  
1102 element within MHS than ZIF-8 and MH, which further suggests that Cas9/sgRNA  
1103 was successfully loaded into MH. (**Fig. 2d**)." In addition, TEM results show that the  
1104 LGG surface was not smooth with numerous nanoparticles attached after  
1105 compounding. The corresponding elemental mapping reveals the presence of more Zn  
1106 elements on the surface of LGG, which further implies that LGG was successfully  
1107 compounded with the MHS nanosystem (**Fig. 2h**). The related data and results have  
1108 been added in the Revised Manuscript. (**Line 162-165, Page 5, Revised Manuscript**)

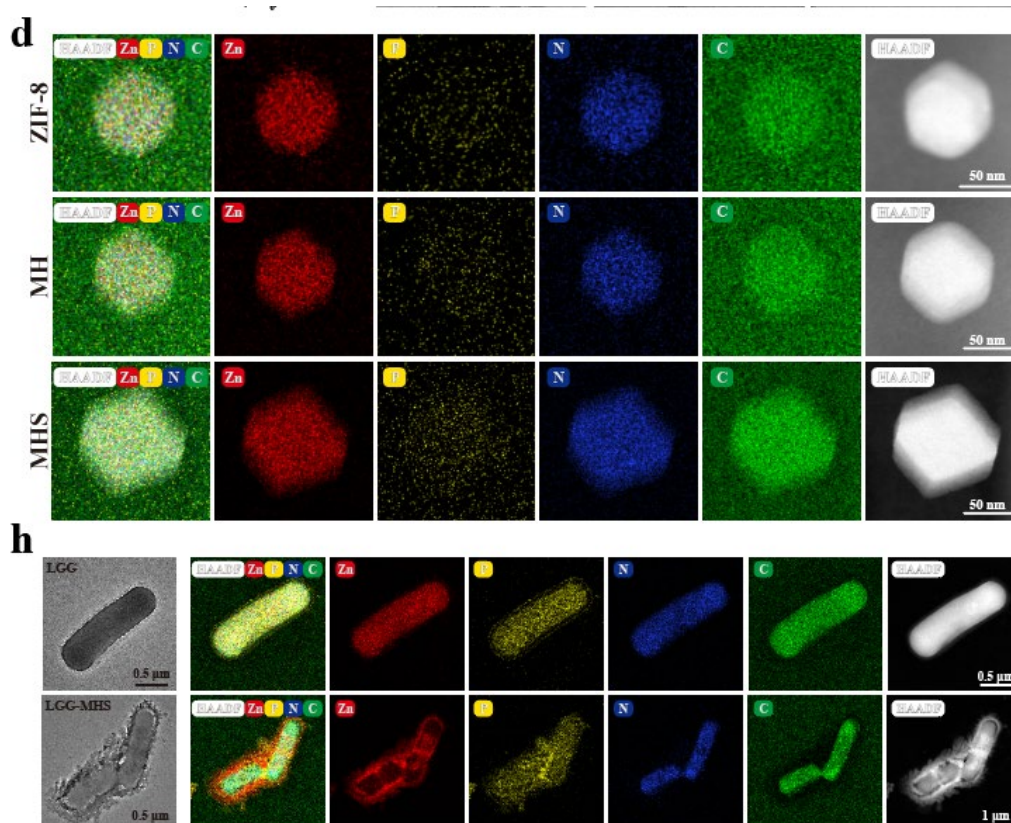

1109

1110 **Fig. 2 Synthesis and structural characterization of ZIF-8, MH, MHS, LGG and LGG-MHS.**  
1111 (d) Elemental mappings of ZIF-8, MH and MHS. (h) Transmission electron microscopic (TEM)  
1112 and corresponding elemental mappings of LGG and LGG-MHS.

1113

1114 5. In line 120, they mentioned “utilizing sodium dodecyl sulfate-polyacrylamide gel  
1115 electrophoresis (SDS-PAGE)”, however, figure S1 shows an agarose gel of the sgRNA  
1116 only. Therefore, they need to show the loading of the different mass ratios of MH to  
1117 Cas9 used in order to obtain the optimal loading concentration.

1118 **Response:** Thank you very much for your kind comments. We sincerely apologize for  
1119 the error in our wording in line 122 of the manuscript, we did use agarose gel  
1120 electrophoresis to explore the optimal mass ratio for MH loading Cas9/sgRNA. Due  
1121 to the ratio of Cas9 to sgRNA being fixed, we preincubated CRISPR-Cas9 system to  
1122 sgRNA in a 1:1 molar ratio to synthesize RNP according to the product specification  
1123 (Cat# 1081058, IDT). And then, different mass ratios of MH to Cas9/sgRNA (MH:  
1124 sgRNA of 0, 2, 4, 6, 8, 10, 12) were used to prepare MHS in order to achieve optimal  
1125 Cas9/sgRNA loading efficiency. The outcome shows that a ratio of 4 for MH:  
1126 Cas9/sgRNA result in the optimal loading efficiency of Cas9/sgRNA.

1127 We apologize for the unclear description in the manuscript, and it has been  
1128 corrected in the Revised Manuscript, which reads: “Different mass ratios of MH to  
1129 Cas9/sgRNA were used to prepare MHS in order to achieve optimal Cas9/sgRNA  
1130 loading efficiency, and the amount of sgRNA in the nanosystem was determined  
1131 utilizing agarose gel electrophoresis (AGE) (**Supplementary Fig. 2a**). The outcome  
1132 shows that a ratio of 4 for MH: Cas9/sgRNA results in the optimal loading efficiency  
1133 of Cas9/sgRNA.” (**Line 127-131, Page 4, Revised Manuscript**)

1134

1135 6. Figure S3, the MHS stability experiment has to be conducted after 12, 24hrs, since  
1136 the system is incubated with the cells for 24 hrs. Also, running the same experiment

1137 on SDS PAGE with free Cas9/sgRNA would show the stability of Cas9 as well.

1138 **Response:** Thank you very much for your constructive suggestions. According to the  
1139 reviewer's suggestion, we have improved the experimental method by incubating  
1140 Cas9/sgRNA and MHS in 10% serum for 0 h, 6 h, 12 h and 24 h before performing  
1141 agarose gel electrophoresis. In addition, we also performed electrophoresis on SDS-  
1142 PAGE for the Cas9/sgRNA and MHS after the same treatment to explore the stability  
1143 of Cas9. The results of sgRNA stability are shown in Supplementary Figure 2d-e. The  
1144 sgRNA with MH remained stable after 12 h. On the contrary, the free sgRNA was  
1145 almost completely degraded, which further indicates that Cas9/sgRNA can minimize  
1146 degradation after being loaded by MH. And the stability of Cas9 protein was not  
1147 affected by either naked Cas9/sgRNA or MHS (**Supplementary Fig. 2f, g**). The  
1148 related data have been added in the Revised Supplementary Information.  
1149 (**Supplementary Figure 2, Page 8, Revised Supplementary Information**)

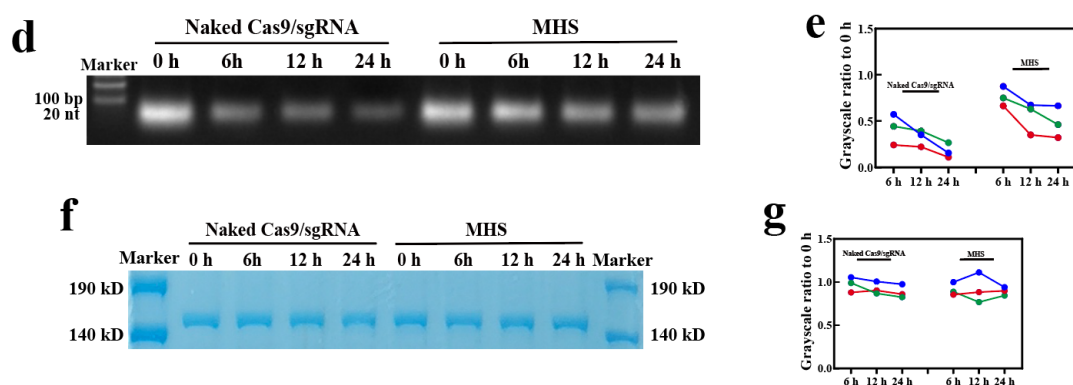

1150

1151 **Supplementary Figure 2.** (d) Agarose gel electrophoresis and (e) corresponding quantitative  
1152 analysis to evaluate the serum stability of Cas9/sgRNA and Cas9/sgRNA reconstituted from MHS  
1153 ( $n = 3$ ). (f) SDS-PAGE and (g) corresponding quantitative analysis to evaluate the serum stability  
1154 of Cas9/sgRNA and Cas9/sgRNA reconstituted from MHS ( $n = 3$ ).

1155

1156 7. Figure 3a, the group measured the generated ROS after exposing MHS to US, but  
1157 they did not report the effect of US radiation on ZIF-8 alone and MH, and hence, the  
1158 reason for adding HMME would be justified.



1159 **Response:** Thank you very much for your constructive suggestions. We refined the  
1160 experimental groups (including Control, US only, ZIF-8, ZIF-8 + US, MH, MH + US,  
1161 MHS and MHS + US) to investigate whether ZIF-8 and MH had an effect on ROS  
1162 production in the presence of US, respectively. The confocal laser scanning  
1163 microscopy (CLMS) images show that the MH + US group and MHS + US group  
1164 produce a large amount of ROS compared to other groups, demonstrating that the  
1165 presence of HMME is one of the necessary components for ROS production (**Fig. 3a**  
1166 **and Supplementary Fig. 3a**). The related data have been added in the Revised  
1167 Manuscript and Revised Supplementary Information. (**Line179-184, Page 6, Revised**  
1168 **Manuscript and Supplementary Figure 3a, Page 10, Revised Supplementary**  
1169 **Information**)

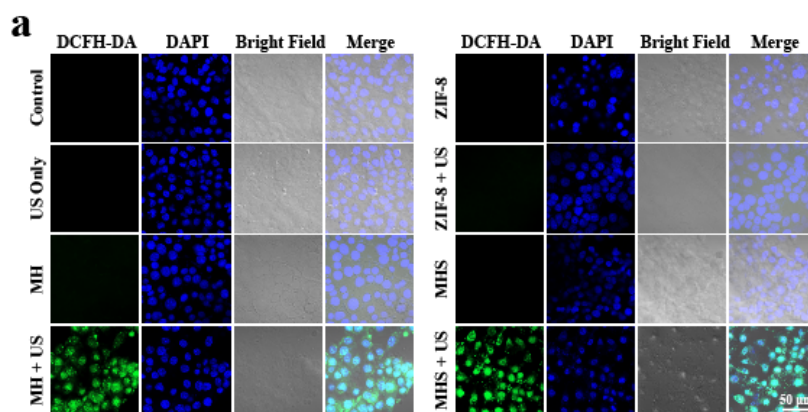

1170

1171 **Fig. 3 Evaluation of US-associated *IDO1* genome editing *in vitro*.** (a) CLSM images of 4T1  
1172 cells with different treatments (including Control, US only, ZIF-8, ZIF-8 + US, MH, MH + US,  
1173 MHS and MHS + US). Concentration = 100  $\mu\text{g}/\text{mL}$ . Incubation time = 12 h. ( $n = 3$ )

1174

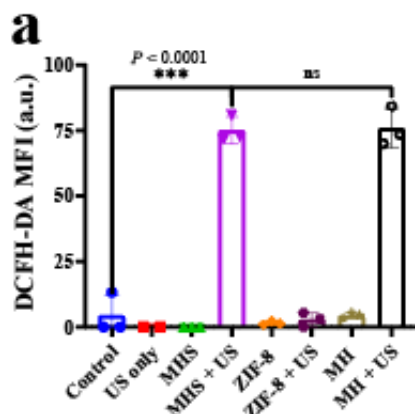

1175

1176 **Supplementary Figure 3.** (a) Fluorescence intensity of CLSM images of 4T1 cells with different  
 1177 treatments (including Control, US only, ZIF-8, ZIF-8 + US, MH, MH + US, MHS and MHS + US)  
 1178 ( $n = 3$ ). \* $P < 0.05$ , \*\* $P < 0.01$ , \*\*\* $P < 0.001$ , \*\*\*\* $P < 0.0001$ .

1179

1180 8. In Figure S7, the author claims that Cy5.5-labeled Cas9/sgRNA system entered the  
 1181 nucleus, however, the Cy5 signal seems to follow the pattern of the lysotracker. In  
 1182 addition, the nucleus does not look intact. Z-stack is needed to show localization in  
 1183 the nucleus.

1184 **Response:** Thank you very much for your constructive suggestions. According to the  
 1185 reviewer's suggestion, confocal laser scanning microscopy (Z-stack model) have been  
 1186 conducted, As shown in Supplementary Fig. 3b, under US irradiation, the Cy5.5-  
 1187 labeled red fluorescence signal was separated from the green fluorescence signal of  
 1188 lysosomes, while Cy5.5-labeled red fluorescence was detected in the nucleus,  
 1189 indicating that US irradiation is required for Cas9/sgRNA endosomal/lysosomal  
 1190 escape. The related data have been updated in the Revised Information (Line 187-190,  
 1191 Page 6, Revised Information).

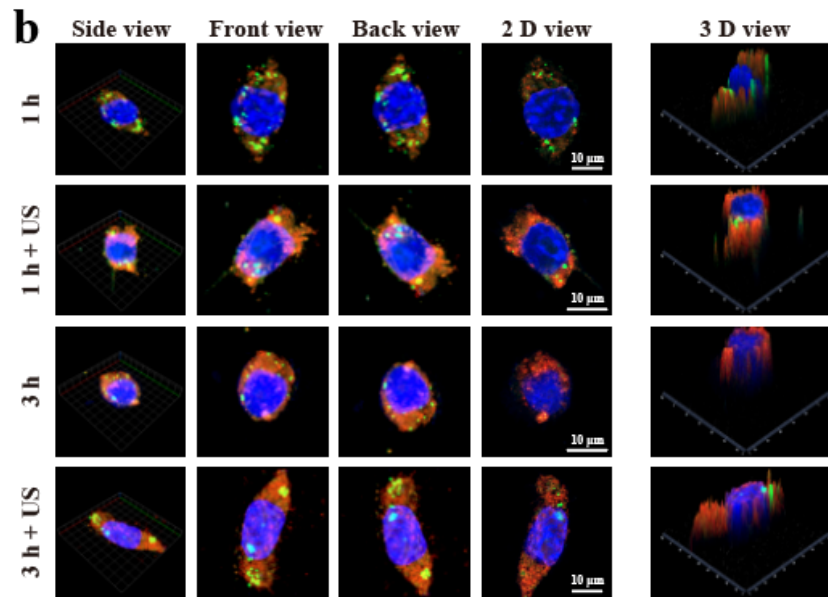

1192

1193 **supplementary Figure 3.** (b) Z-stack CLSM images of 4T1 cells cultured with Cy5.5-labeled  
 1194 MHS nanosystem upon US irradiation for 1 and 3 h at 37 °C. The cell nuclei were stained with  
 1195 DAPI (blue), endo/lysosomes were stained with LysoTracker Green (green), and MHS was  
 1196 labeled with Cy5.5 (red). ( $n = 3$ )

1197

1198 *9. In the cytotoxicity experiment (Figure 3d), if the role of gene silencing is to improve*  
 1199 *the immune system mediated killing of the cells, why do we see improved efficacy*  
 1200 *when no immune cells are present in the model? Why is the toxicity MHS+US*  
 1201 *significantly higher than the MH+US system. Similar observation was seen with*  
 1202 *Fig.3e &S8 between MH+US and MHS+US group. Why the presence of Cas9/sgRNA*  
 1203 *increased the apoptosis in 4T1 cells?*

1204 **Response:** Thank you very much for your kind question. IDO inhibition results not  
 1205 only in enhanced immune aspects, but also in other aspects that inhibit tumor cell  
 1206 proliferation and promote apoptosis. The current studies on the effect of *IDO1* gene  
 1207 silencing are mainly focused on the immune aspect<sup>65-68</sup>. IDO acts as an endogenous  
 1208 immunosuppressive mediator, stimulating the accumulation of FOXP3<sup>+</sup> Tregs and  
 1209 suppressing T cell activity by depleting Trp in the microenvironment<sup>29, 30</sup>. However,  
 1210 the presence of IDO as a rate-limiting step enzyme of the kynurenine pathway (KP)  
 1211 can have a fundamental impact on cell function and survival<sup>69</sup>. Tryptophan is the

1212 rarest essential amino acid in food and is used not only for tissue protein synthesis but  
1213 also as a precursor for a range of biologically active metabolites. Although a small  
1214 fraction of free Trp is used for protein synthesis and the production of  
1215 neurotransmitters such as 5-hydroxytryptamine and neuromodulators such as  
1216 tryptamine, more than 95% of free Trp is a substrate of the KP pathway, which  
1217 produces several metabolites with unique biological activity in immune responses and  
1218 neurotransmission<sup>70,71</sup>. Representative of these is NAD(P)H and KP is a major source  
1219 of ab initio NAD synthesis, with studies showed that abnormalities in the KP pathway  
1220 lead to rapid depletion of NAD by PARP, which results in apoptosis of lung cancer  
1221 cells mediated by NAD(P)H quinone dehydrogenase 1 (NQO1)<sup>72-74</sup>. It was shown that  
1222 IDO metabolizes TRP to generate kyn and kyn, which are further metabolized to  
1223 3HK (3-hydroxy-kynurenine) and HAA (3-hydroxyanthranilic acid), two downstream  
1224 metabolites with a strong ability to scavenge ROS<sup>75</sup>, which would affect the efficiency  
1225 of SDT and thus reduce the killing effect on 4T1 cells *in vitro*. In addition, another  
1226 downstream metabolite of TRP, indole-3-pyruvate, was reported to have strong anti-  
1227 iron death activity not long ago<sup>76</sup>. Alternatively, it has been shown that tumors display  
1228 enhanced IDO expression and that downstream metabolites (*e.g.*, Kyn) can activate  $\beta$ -  
1229 linked protein signaling, leading to increased proliferation of colon cancer in mice.<sup>77</sup>

1230 Therefore, IDO inhibition results not only in enhanced immune aspects, but also  
1231 in other aspects that inhibit tumor cell proliferation and promote apoptosis, so that in  
1232 vitro also results in superior therapeutic effects compared to other groups.

1233

1234 *10. In Figure 3h, the 12% difference in cleavage between the two groups is not*  
1235 *reflected in agarose gel. Also, NGS and the Deep sequencing data for MHS only were*  
1236 *not provided.*

1237 **Response:** Thank you very much for your kind comments. Agarose gel  
1238 electrophoresis was used to re-probe the gene editing efficiency of Cas9/sgRNA on

1239 4T1 cells for 3 times. Grayscale analysis for the target bands showed that the MHS +  
 1240 US group produced more cleavage products relative to the MHS group (Fig. 3i,  
 1241 Supplementary Fig. 3h). In addition, NGS and deep sequencing for other groups  
 1242 have been provided in Revised Manuscript and Revised Supplementary Information.  
 1243 (Fig.3j, k, Page32-33, Revised Manuscript; Supplementary Fig. 3-4, Page10-11,  
 1244 Revised Supplementary Information) The results indicate that US-generated ROS  
 1245 disruption of the lysosomal membrane could significantly improve genome editing  
 1246 efficiency.

1247

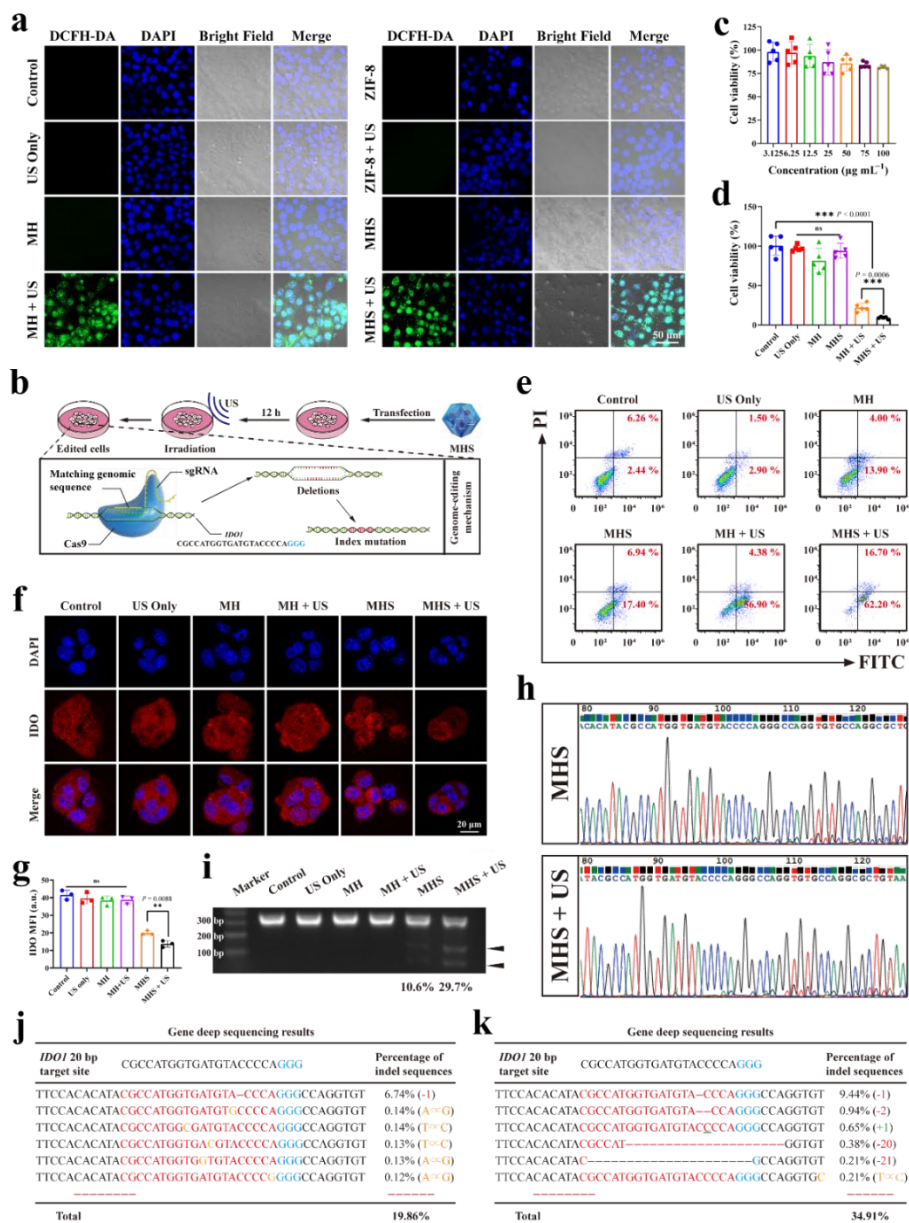

1248

1249 **Fig. 3 Evaluation of US-associated *IDO1* genome editing *in vitro*.** (a) CLSM images of 4T1  
1250 cells with different treatments (including Control, US only, ZIF-8, ZIF-8 + US, MH, MH + US,  
1251 MHS and MHS + US). Concentration = 100  $\mu\text{g}/\text{mL}$ . Incubation time = 12 h. ( $n = 3$ ) (b) Illustration  
1252 of transfection process of 4T1 cells by MHS upon US. (c) Toxicity evaluation in 4T1 after  
1253 incubated with different concentrations of MHS, cell viability was analyzed by 24 h after the  
1254 treatment. ( $n = 5$ ) (d) Cell viability of 4T1 cells after various treatments for 24 h. ( $n = 5$ )  $*P < 0.05$ ,  
1255  $**P < 0.01$ ,  $***P < 0.001$ ,  $****P < 0.0001$ . (e) Flow cytometry analysis of apoptosis of 4T1 cells  
1256 with various treatments, including control, US only, MH, MH + US, MHS, and MHS + US. (f)  
1257 CLSM images and (g) corresponding mean fluorescence intensity of 4T1 cells treated with various  
1258 treatments after IFN  $\gamma$  -stimulation, including control, US only, MH, MH + US, MHS and MHS +  
1259 US, followed by staining with fluorescent anti-IDO antibody (red). DAPI was used to stain the  
1260 nucleus of the cell (blue) ( $n = 3$ ). (h) *In vitro* DNA sequencing of *IDO1* in 4T1 cells after  
1261 treatment with MHS and MHS + US. (i) T7EI cleavage analysis after 4T1 cells with different  
1262 treatments, including control, US only, MH, MH + US, MHS and MHS + US ( $n = 3$ ). (j-k) Deep  
1263 sequencing analysis of gene editing in 4T1 cells in the presence of MHS and MHS + US.

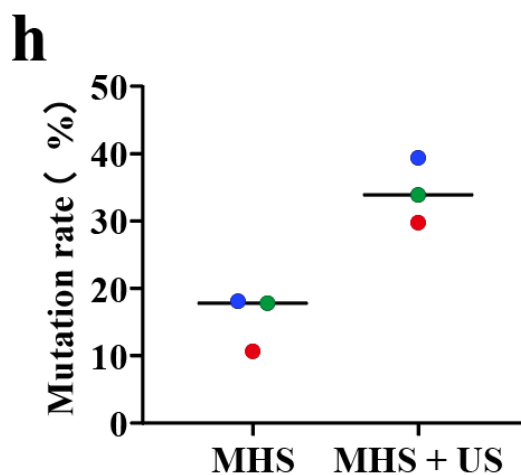

1264

1265 **Supplementary Figure 3.** (h) Corresponding quantitative analysis of T7E I cleavage after 4T1  
1266 cells with different treatments, including control, US only, MH, MH + US, MHS, and MHS + US.

1267





1275 *focus to make it easier to visualize and compare.*

1276 **Response:** Thank you very much for your kind comments. The image of the MHS +  
1277 US group in Fig. 3f has been replaced. The replacement image is from a previous  
1278 repeat experiment of the MHS + US group taken under the same experimental  
1279 conditions, with its focus on the nucleus, making its experimental results convincing  
1280 in comparison with those of the other groups. (Fig 3f, g, Page 32-33, Revised  
1281 Manuscript)

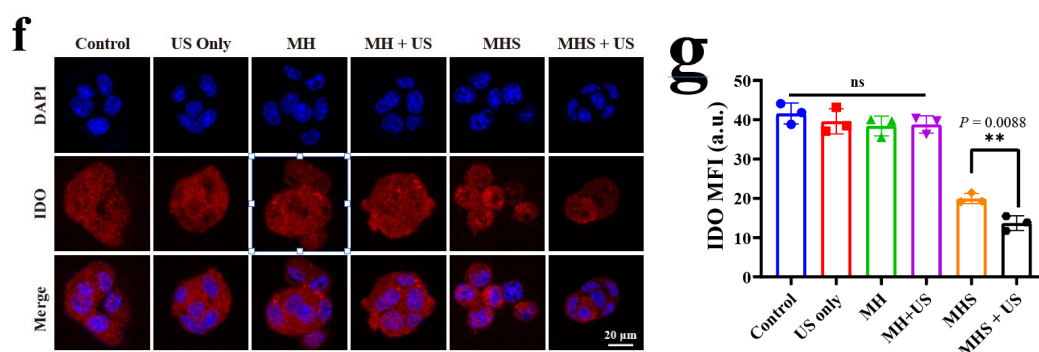

1282

1283 **Fig. 3 Evaluation of US-associated *IDO1* genome editing *in vitro*.** (f) CLSM images and (g)  
1284 corresponding mean fluorescence intensity of 4T1 cells treated with various treatments after IFN $\gamma$ -  
1285 stimulation, including control, US only, MH, MH + US, MHS and MHS + US, followed by  
1286 staining with fluorescent anti-*IDO* antibody (red). DAPI was used to stain the nucleus of the cell  
1287 (blue) ( $n = 3$ ).

1288

1289 *12. In fig. S9, the expression of IDO1 seems to be lower in the case of MHS compared*  
1290 *to MHS+US which contradict the gene deletion rates mentioned in line 205 and 206.*

1291 **Response:** Thank you very much for your kind comments. To investigate the gene  
1292 editing efficacy of the MHS nanosystem under US irradiation, Cas9/sgrRNA-mediated  
1293 *IDO1* degradation was examined in 4T1 cells by employing immunofluorescence  
1294 staining and Western blotting. Four replicates of WB were performed for *IDO* protein  
1295 expression. We then performed a quantification analysis of the results. The average  
1296 *IDO*/ $\beta$ -Actin value in the MHS group was 0.46, whereas the average *IDO*/ $\beta$ -Actin  
1297 value in the MHS+US group was significantly lower compared to the MHS group,

1298 with an average value of 0.30. These results indicate that Cas9/sgRNA effectively  
 1299 mediated the *IDO1* knockdown. The related data have been added in the Revised  
 1300 Supplementary Information (Supplementary Figure 3e, f, Page 10, Revised  
 1301 Supplementary Information).

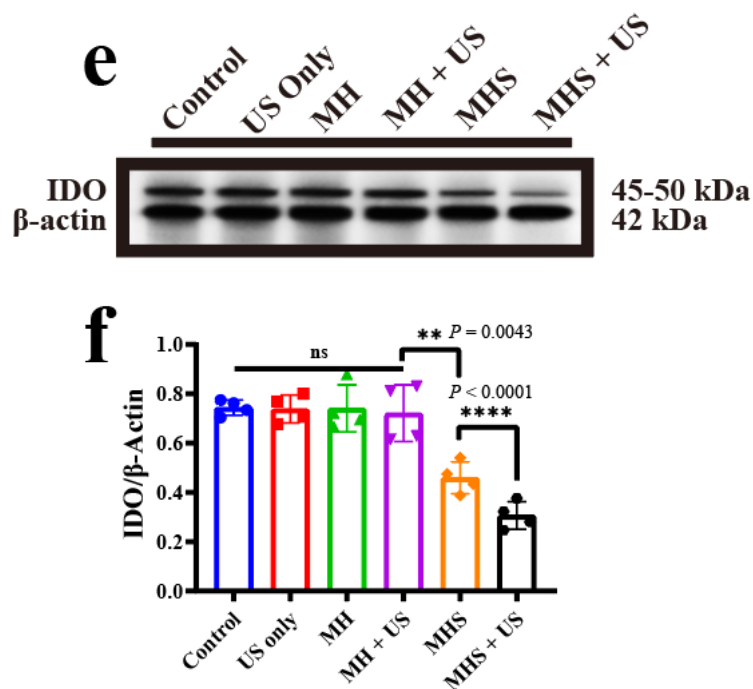

1302

1303 **Supplementary Figure 3.** (e) Western Blot and (f) corresponding quantitative analysis of IFN $\gamma$ -  
 1304 stimulated 4T1 cells treated with various treatments, including control, US only, MH, MH + US,  
 1305 MHS, and MHS + US ( $n = 4$ ). \* $P < 0.05$ , \*\* $P < 0.01$ , \*\*\* $P < 0.001$ , \*\*\*\* $P < 0.0001$ .

1306

1307 *13. In the experiment “In vitro exploration of ultrasonic-immunometabolic therapy”*  
 1308 *line 236-237, the correlation or the mechanism by which MHS + US triggered the*  
 1309 *ICD is not clear since some groups showed similar trends in the case of protein*  
 1310 *expression Ex. MHS group had similar protein expression for CRT and HSP70 to*  
 1311 *MHS +US group (Figure 4a).*

1312 **Response:** Thank you very much for your kind comments. There is growing evidence  
 1313 that ultrasound-activated sonosensitizers can cause apoptosis/necrosis of tumor cells,  
 1314 which then elicit some degree of immune response by generating tumor-associated

1315 neoantigens<sup>78-80</sup>. It has also been shown that when cells are subjected to  
1316 microenvironmental stimuli or dysregulation of the antioxidant system to generate an  
1317 excess of ROS, the production of intracellular ROS can disrupt the integrity of  
1318 macromolecular biology, cause cellular damage, generate oxidative stress, have  
1319 damaging effects on intracellular mitochondrial DNA and induce apoptosis<sup>81, 82</sup>.  
1320 Therefore, our strategy is to use the irradiation of MHS nanosystem US to generate  
1321 ROS, which induces ICD,*i.e.*, triggers ER stress response, and dying tumor cells  
1322 release tumor antigens and present them to DCs, while releasing DAMPs from  
1323 intracellular cells to promote maturation of immature DCs and enhance the ability of  
1324 DCs to recognize the presented antigens. When ICD occurs, dying tumor cells release  
1325 immune signaling molecules, collectively known as DAMPs, which include CRT  
1326 exposed on the cell surface and high mobility group protein 1 (HMGB1) released  
1327 outside the cell nucleus.

1328 In addition, we also performed protein extraction and WB replicate experiments  
1329 on cells after different treatments (control, US only, MH, MHS, MH + US, MHS +  
1330 US). The protein bands as well as the grey scale analysis showed that the protein  
1331 expression of the groups without US irradiation was significantly different from that  
1332 of the groups with US irradiation. Co-incubation of 4T1 cells with MH + US or  
1333 MHS+ US caused a decrease of HMGB1 band intensity and an increase of CRT and  
1334 HSP70 band intensity. (Fig. 4a and Supplementary Fig. 5a-c). In addition, CLSM was  
1335 also used to detect the expression of protein amounts after different treatments. As a  
1336 result of fluorescence quantification, it showed the similar tendency as WB. It  
1337 indicates that HMME induced by US caused the production of ROS inside the cells,  
1338 which triggered ICD in tumor cells. The related data and discussion have been added  
1339 in the Revised Manuscript and Revised Supplementary Information (**Fig. 4a-d, Page**  
1340 **34-35, Revised Manuscript; Supplementary Figure. 5, Page 12, Revised**  
1341 **Supplementary Information**).

1342

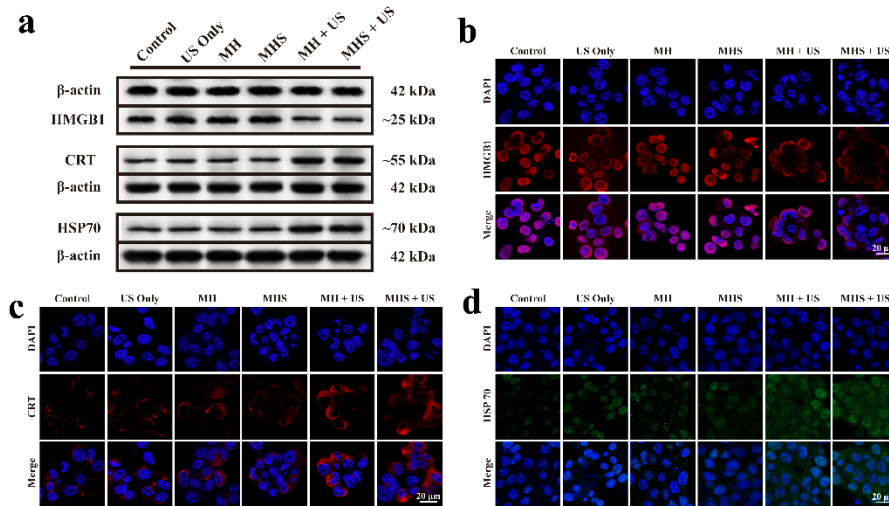

1343

1344 **Fig. 4 ICD facilitates antitumor immunity against 4T1 cells *in vitro*.** (a) Western blot analysis  
 1345 of specific proteins expression after DAMPs (HMGB1, CRT and HSP70). 4T1 cells were left  
 1346 untreated, treated with US only, co-incubated with MH, MHS, MH + US and MHS + US.  
 1347 Concentration = 100  $\mu$ g/mL. Incubation time = 12 h ( $n = 4$ ). (b-d) Immunofluorescence analysis of  
 1348 specific proteins expression after DAMPs, including HMGB1 (red), CRT (red) and HSP70 (green).  
 1349 4T1 cells were left untreated, treated with US only, co-incubated with MH, MHS, MH + US and  
 1350 MHS + US. DAPI was used to stain the nucleus of the cell (blue) ( $n = 3$ )

1351

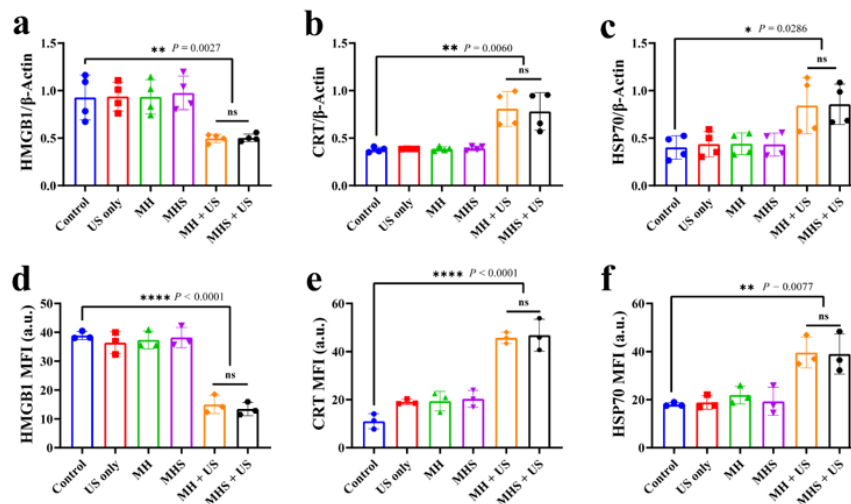

1352

1353 **Supplementary Figure 5.** (a-c) The quantitative analysis of HMGB1, CRT and HSP70 on  
 1354 Western Blot. ( $n = 4$ ). \* $P < 0.05$ , \*\* $P < 0.01$ , \*\*\* $P < 0.001$ , \*\*\*\* $P < 0.0001$ . (d-f) Fluorescence  
 1355 intensity of HMGB1, CRT and HSP70 on CLSM ( $n = 3$ ). \* $P < 0.05$ , \*\* $P < 0.01$ , \*\*\* $P < 0.001$ ,  
 1356 \*\*\*\* $P < 0.0001$ .

1357

1358 *14. In figure 5, was RNAseq-based KEGG analysis of differential gene expression*  
1359 *profiles conducted for LGG-MHS+US treatment only? Again there are many controls*  
1360 *missing.*

1361 **Response:** Thank you very much for your kind comments. We apologize for the errors  
1362 in the description and layout of the paper that caused some confusion to the reviewers.  
1363 The sequencing in Figure 5 explores the mechanism by which LGG alone promotes  
1364 tumor therapy, and our statement in the label in Figure 5g and line 308-314 of the  
1365 original manuscript is correct. We apologize for the misspelling of "LGG" as "LGG-  
1366 MHS+US" in the figure caption to Figure 5. we have made corrections in the Revised  
1367 Manuscript. (Fig.5, Page 36, Revised Manuscript).

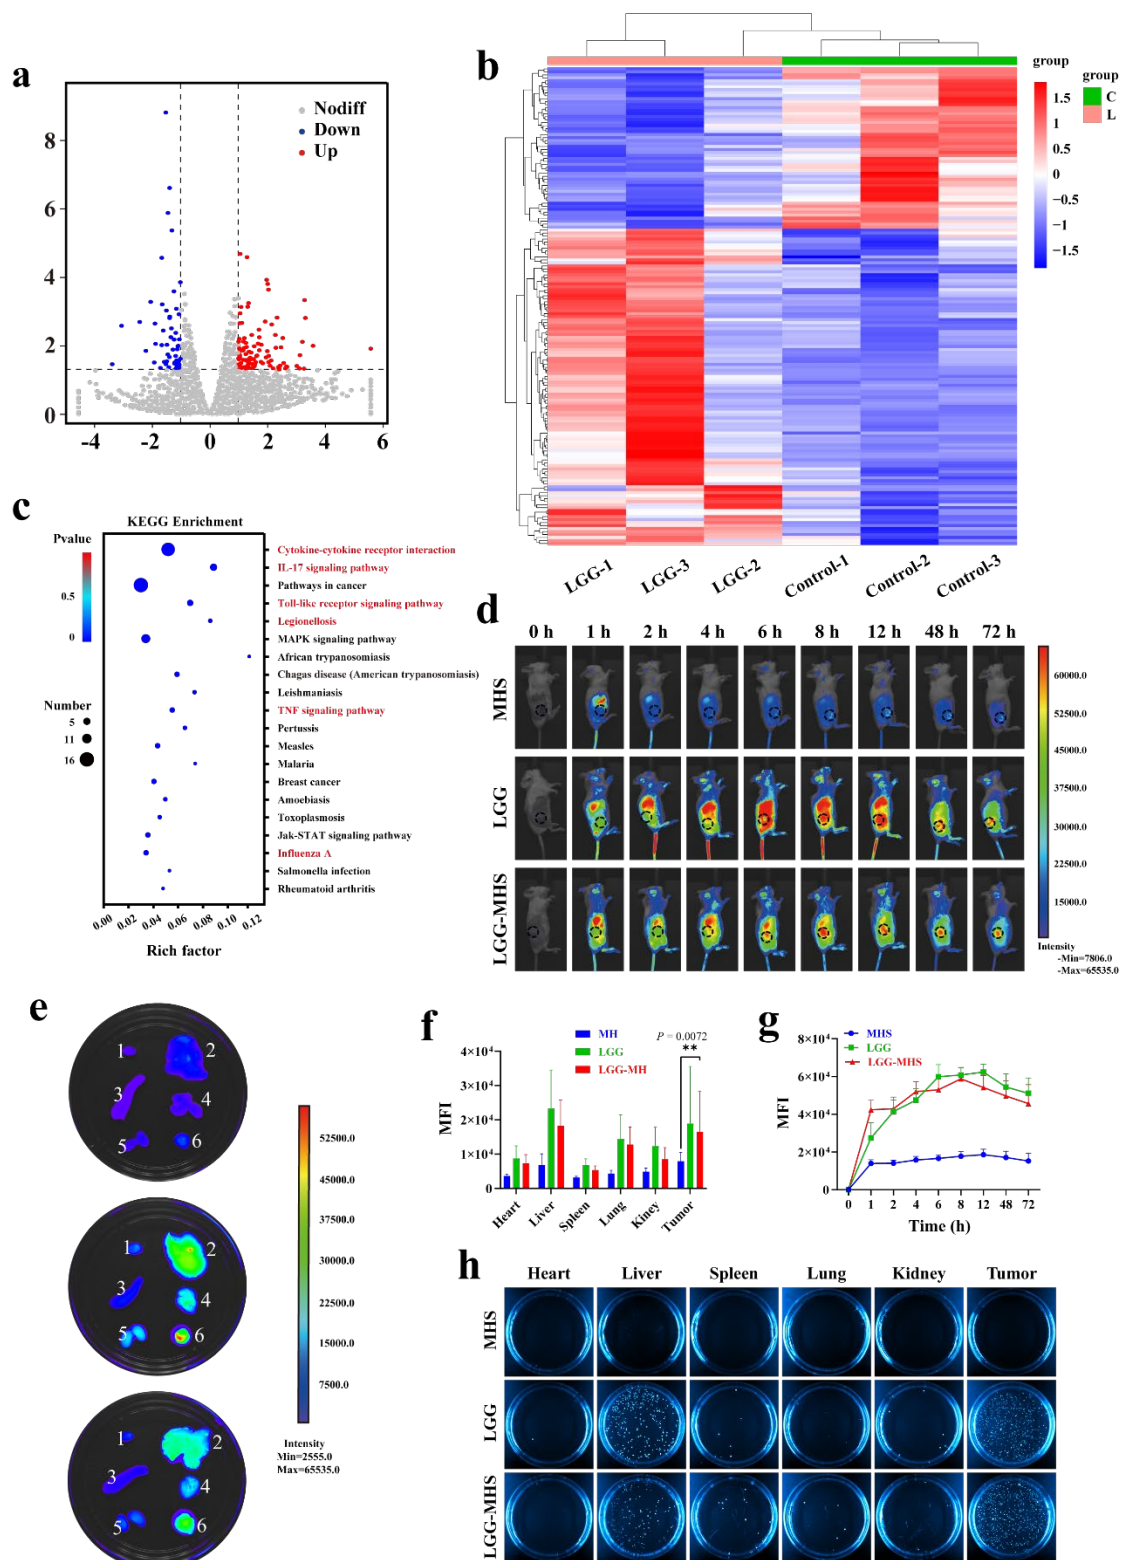

1368

1369 **Fig. 5 Bacterial hypoxia targeting characterization and bacterial sequencing.** (a) Volcano map  
 1370 and (b) Heatmap of genes alteration with or without LGG treatment ( $P < 0.05$ ,  $|\text{fold change}| \geq 2$ ).  
 1371 (c) RNAseq-based KEGG analysis of differential gene expression profiles after LGG treatment. (d)  
 1372 *In vivo* imaging and (g) corresponding fluorescence intensity of Cy5.5-labeled MHS, Cy5.5-  
 1373 labeled LGG and Cy5.5-labeled LGG-MHS in mice, respectively. ( $5 \times 10^6$  CFU per mouse,  $n = 3$ ).

1374 \* $P < 0.05$ , \*\* $P < 0.01$ , \*\*\* $P < 0.001$ , \*\*\*\* $P < 0.0001$ . (e) Accumulation and (f) corresponding  
1375 mean fluorescence intensity of Cy5.5-labeled MHS, Cy5.5-labeled LGG and Cy5.5-labeled LGG-  
1376 MHS in major organs (1. Heart, 2. Liver, 3. Spleen, 4. Lung, 5. Kidney, 6. Tumor.  $n = 3$ ). (h)  
1377 Photographs of bacterial colonization in various organs harvested from 4T1-bearing mice at  
1378 various time points after injection of MHS, LGG, and LGG-MHS on solid MRS agar plates ( $n =$   
1379 3).

1380

1381 *15. The biosafety of the LGG-MHS nanosystem on different organs was evaluated*  
1382 *without applying the US which is the main activator of the system. It would be more*  
1383 *reflective to show that after applying US.*

1384 **Response:** Thank you for your constructive suggestions. Based on your suggestion,  
1385 we explored the safety of different doses of LGG-MHS under US irradiation (control,  
1386 10 mL/kg, 20 mL/kg, 30 mL/kg, 40 mL/kg. 1mL LGG-MHS including  $1 \times 10^7$  LGG  
1387 and 200 $\mu$ g MHS). Mice were injected with different doses of LGG-MHS 7 days after  
1388 tumor cell injection and US was applied to the tumor site the day after LGG-MHS  
1389 injection. Statistical analysis of the data samples for safety evaluation was performed  
1390 using Dunnett's multiple comparisons post test. It was found that mice injected with  
1391 2-fold the therapeutic dose showed no abnormalities in haematological parameters  
1392 and organ HE sections compared to untreated mice, demonstrating the excellent  
1393 biosafety of the LGG-MHS nanosystem under US irradiation (**Supplementary Fig. 8**).  
1394 The related data and discussion have been added in the Revised Supplementary  
1395 Information (**Supplementary Figure 8, Page 15, Revised Supplementary**  
1396 **Information**).

1397



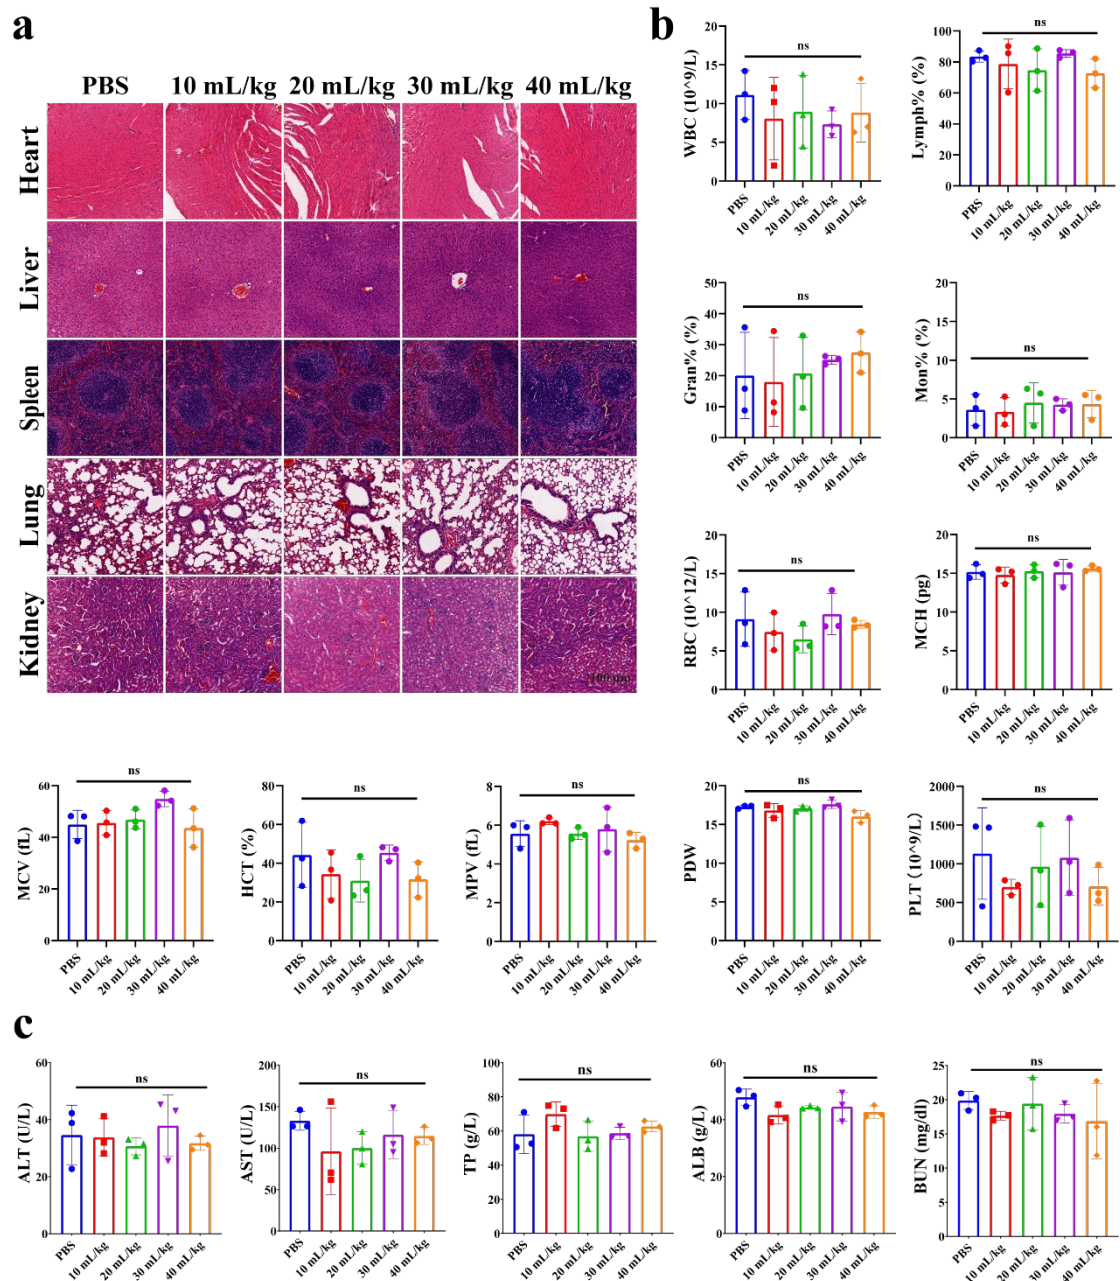

1398

1399 **Supplementary Figure 8.** (a) HE staining of histological sections of healthy mice treated with  
 1400 different doses of LGG-MHS (PBS, 10 mL/kg, 20 mL/kg, 30 mL/kg, 40 mL/kg. 1 mL LGG-MHS = 1  
 1401  $\times 10^7$  LGG, 1 mg MHS) and subjected to US irradiation of each organ. ( $n = 3$ ) (b) In vivo  
 1402 hematological indices. Hematological assays of healthy mice treated with different doses of LGG-  
 1403 MHS (PBS, 10 mL/kg, 20 mL/kg, 30 mL/kg, 40 mL/kg. 1 mL LGG-MHS = 1  $\times 10^7$  LGG, 1 mg  
 1404 MHS). (c) *In vivo* liver and kidney function index. Hematological assays of mice healthy mice  
 1405 treated with different doses of LGG-MHS (PBS, 10 mL/kg, 20 mL/kg, 30 mL/kg, 40 mL/kg. 1 mL  
 1406 LGG-MHS = 1  $\times 10^7$  LGG, 1 mg MHS). ( $n = 3$ ) \* $P < 0.05$ , \*\* $P < 0.01$ , \*\*\* $P < 0.001$ , \*\*\*\* $P <$   
 1407 0.0001.

1408

1409 *16. For all in vivo experiments with LGG+MHS+US, a main control is missing. The*  
1410 *role of gene knockdown of Cas9/gRNA will not be conveyed clearly if LGG-MH+US*  
1411 *is not tested.*

1412 **Response:** Thank you for your constructive suggestions. According to the reviewer's  
1413 suggestion, the corresponding experimental controls such as LGG-MH + US (without  
1414 CRISPR/Cas9 system) group in animal models have been added to explore the  
1415 contribution of IDO decrease to tumor growth inhibition. As a result, compared to the  
1416 control group although LGG-MH exhibited some inhibition of tumor growth under  
1417 irradiation with US, it failed to achieve the elimination of the primary tumor.  
1418 Attributed to IDO immunotherapeutic target inhibition, the LGG-MHS+US group  
1419 exhibited a superior ability to inhibit tumor growth with a tumor elimination rate of  
1420 4/5 (**Figure 6b, c**). Despite the relatively strong inhibitory effect of LGG-MH + US  
1421 on primary tumor growth, the results of its survival analysis (**Supplementary Figure**  
1422 **9b**), inhibition of distal tumors, and against lung metastases (**Figure 8**) were not  
1423 satisfying. The relevant details have been provided in the Revised Manuscript as  
1424 suggested by the reviewers. (**Line 476-480, Page 15, Revised Manuscript and**  
1425 **Supplementary Figure 9, Page 16, Revised Supplementary Information**)

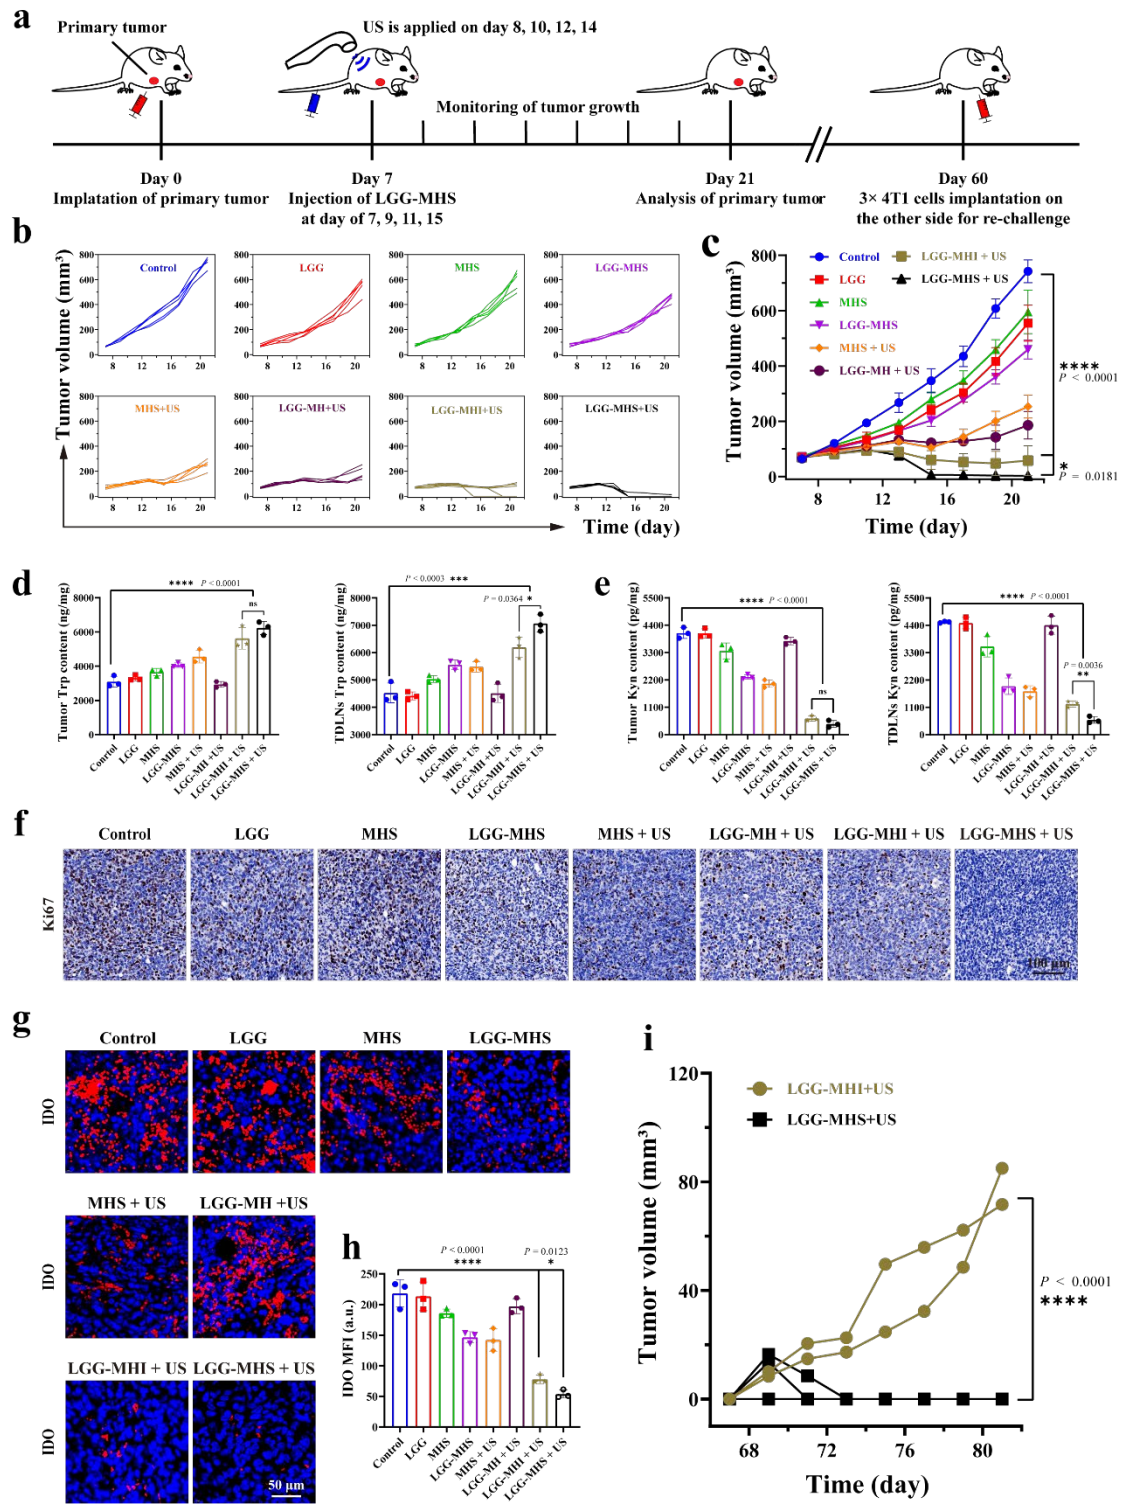

1426

1427 **Fig. 6 LGG-MHS + US against 4T1 tumor *in vivo*.** (a) Schematic diagram of primary tumor  
 1428 treatment process *in vivo*. (b) Tumor growth curves of 4T1 after being treated by PBS, LGG, MHS,  
 1429 LGG-MHS, MHS + US, LGG-MH + US, LGG-MHI + US and LGG-MHS + US ( $n = 5$ ). (c)  
 1430 Average tumor growth curves in different groups ( $n = 5$ ). (d) HPLC assay of the Trp content in  
 1431 primary tumors and TDLNs of tumor-bearing mice after different treatments ( $n = 3$ ). (e) Elisa  
 1432 assay Kyn content in primary tumors and TDLNs of tumor-bearing mice after different treatments  
 1433 ( $n = 3$ ). (f) Antigen Ki-67 staining in tumor sections from each experiment group ( $n = 3$ ). (g)

1434 Images and (h) corresponding fluorescence intensity of IDO immunofluorescence staining in  
 1435 primary tumors of 4T1 tumor-bearing mice after various treatments. DAPI was used to stain the  
 1436 nucleus of the cell (blue), and the *IDO1* was stained with anti-*IDO* antibodies (red) ( $n = 3$ ). (i)  
 1437 Average tumor growth curves after being treated by re-challenge. ( $n_{LGG-MHI + US} = 2$ ,  $n_{LGG-MHS + US}$   
 1438  $= 4$ )

1439

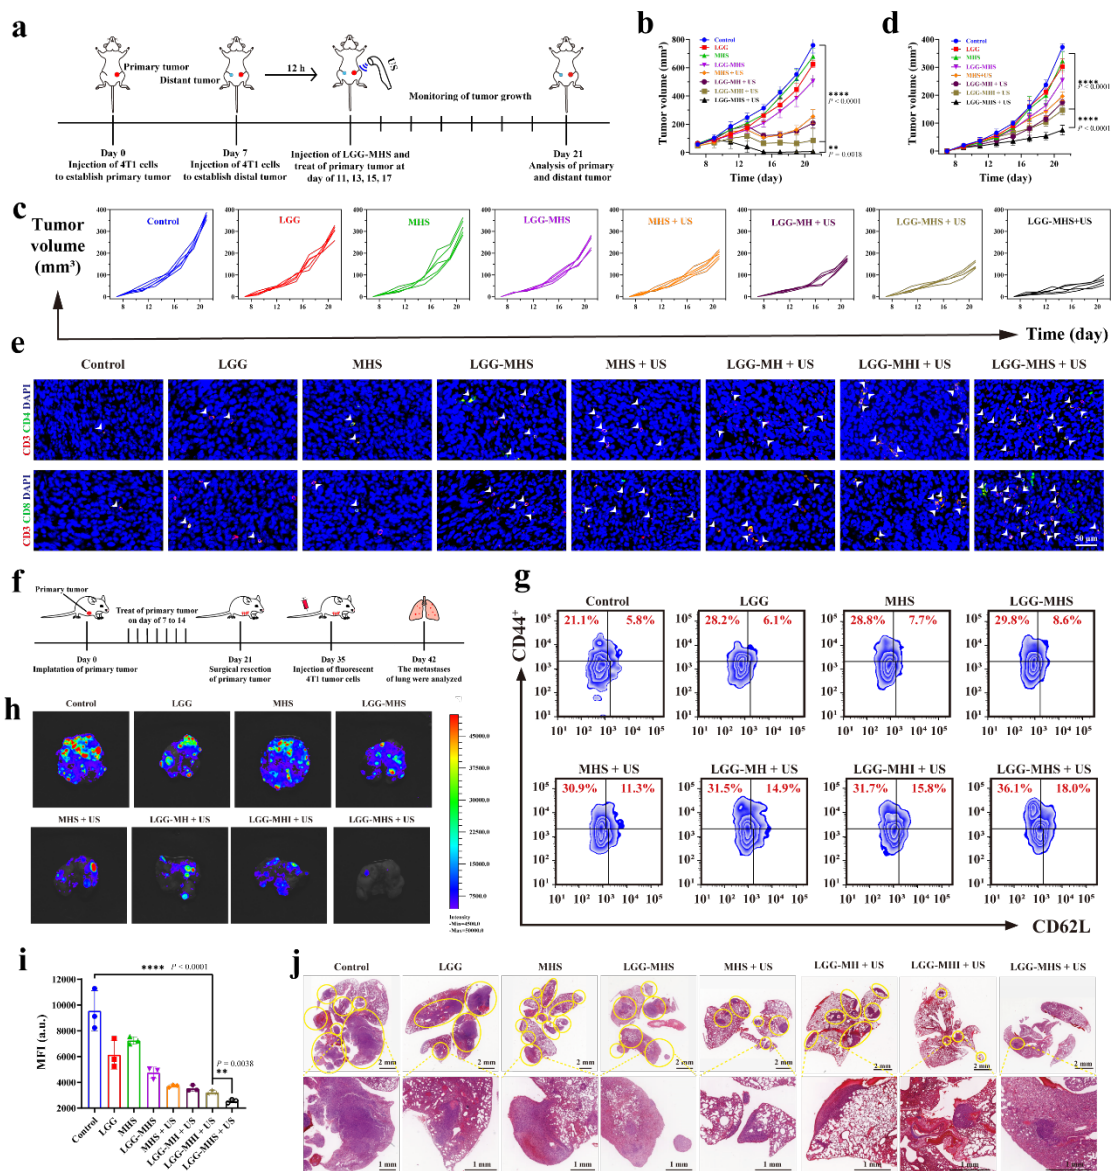

1440

1441 **Fig. 8 Anti distal tumor effect and immunological memory of LGG-MHS + US in the 4T1**  
 1442 **bearing mice model.** (a) Schematic diagram of the establishment of distal tumors model and the  
 1443 experimental procedure of treatment. (b) Average tumor growth curves of primary tumor in  
 1444 different groups ( $n = 5$ ).  $*P < 0.05$ ,  $**P < 0.01$ ,  $***P < 0.001$ ,  $****P < 0.0001$ . (c) Mean growth  
 1445 curves and (d) corresponding growth curves of distant tumors in different groups ( $n = 5$ ).  $*P <$   
 1446  $0.05$ ,  $**P < 0.01$ ,  $***P < 0.001$ ,  $****P < 0.0001$ . (e) Immunofluorescence images of helper T  
 1447 lymphocytes (CD3<sup>+</sup>CD4<sup>+</sup>) and proliferated cytotoxic T lymphocytes (CD3<sup>+</sup>CD8<sup>+</sup>) in 4T1 tumor  
 1448 tissue slices of distal tumor ( $n = 3$ ). (f) Schematic diagram of the establishment and treatment  
 1449 process of mouse models of lung metastasis. (g) Typical flow cytometric of the effector memory T

1450 cells (CD3<sup>+</sup>CD8<sup>+</sup>CD44<sup>+</sup>CD62L<sup>-</sup>) (Tem) and (CD3<sup>+</sup>CD8<sup>+</sup>CD44<sup>+</sup>CD62L<sup>+</sup>) (Tcm) in the spleen after  
1451 24 h after the first different treatments ( $n = 3$ ). (h) Bioluminescence images and (i) corresponding  
1452 fluorescence intensity quantification of lung metastatic nodules of the 4T1 tumors ( $n = 3$ ). (j) HE  
1453 staining of lung tissue from different groups of 4T1 tumor-bearing mice. The nodules with yellow  
1454 circles in the section diagram indicate metastases in the lungs.

1455

1456 *17. There are many grammatical mistakes that need to be corrected. Ex. Line 75 “is”*  
1457 *not needed, line 77 “barrier”, line 78 “it maintains”, line 166 it improves gene*  
1458 *delivery, line 333 repetition of “that”, figure 5e. “kidney”.*

1459 **Response:** Thank you very much for pointing this issue out. We have carefully  
1460 checked and corrected the spelling and grammatical errors throughout the whole  
1461 manuscript.

1462 Finally, we would like to thank you very much for your comments and  
1463 suggestions of our idea and work, which are very important for us to improve and  
1464 revise our manuscript.

1465



## Response to reviewer #4

1466

1467 *In this manuscript, the authors reported the synthesis of ZIF-8 for tumor targeted*  
1468 *delivery of sonosensitizer HMME and CRISPR/Cas9 system by employing the*  
1469 *intrinsic tumor hypoxia targeting ability of LGG. By downregulating the expression of*  
1470 *IDO1, the obtained composites were shown to be able to effectively suppress tumor*  
1471 *growth via the combined sonodynamic treatment and tumor immunosuppression*  
1472 *reversion. However, similar topics have been widely reported in the past several years*  
1473 *and this study did not provide enough attractive new results.*

1474 **Response:** We appreciate very much for your constructive comments and kind  
1475 recommendation. The specific originality and novelty of this work are herein clarified  
1476 as follows:

1477 (1) **First paradigm of microbial biomimetic CRISPR/Cas9 nanosystem.**  
1478 Although CRISPR/Cas9-mediated gene editing has shown promising results in  
1479 clinical studies. However, how to achieve efficient delivery and controlled release of  
1480 protein/nucleic acid complexes in the *in vivo* environment, thereby reducing off-target  
1481 rates and enabling effective and precise cancer therapy, is an important scientific  
1482 question to be addressed by the CRISPR/Cas9 delivery system. In the present study,  
1483 anaerobic bacteria were combined with CRISPR/Cas9 nanosystem to form a self-  
1484 driven CRISPR/Cas9 nanosystem. The hypoxia-targeting property of LGG provides  
1485 them with the ability to carry CRISPR/Cas9 nanosystem to actively target and  
1486 colonize the tumor. The designed self-driven CRISPR/Cas9 nanosystem provides a  
1487 novel microbial vector for CRISPR/Cas9 delivery, which dramatically decreases the  
1488 off-target rate of gene editing and significantly improves the possibility of further  
1489 clinical application of gene editing technology *in vivo*. Importantly, LGG has  
1490 promising applications in tumor therapy not only as a carrier for nanomedicine  
1491 delivery, but also for regulating tumor microenvironment to activate the immune  
1492 system.

1493

1494           **(2) Pioneering utilization of ultrasound for dual modulation of gene editing**  
1495 **system and immune system.** For the first time, we have established a platform that  
1496 allows gene knockdown under US irradiation while reprogramming the tumor  
1497 immunosuppressive microenvironment. The CRISPR/Cas9 gene editing system can  
1498 generate ROS by US triggered. ROS effectively disrupts the structure of the  
1499 lysosomal membrane and promotes the CRISPR/Cas9 nanosystem release, enabling  
1500 gene knockdown. Meanwhile, abundant ROS generated by US can induce ICD.  
1501 Molecular damage-related proteins released by ICD are absorbed by immature DC as  
1502 antigens, promoting their maturation, thereby upregulating killer T cells and  
1503 enhancing immunotherapy.

1504           **(3) Comprehensive activation of the immune system by multiple pathways.**  
1505 The self-driven system efficiently delivers the CRISPR/Cas9 system to knock down  
1506 *IDO1* to reduce immunosuppressive cells (Tregs), while LGG activates multiple  
1507 signaling pathways to enhance intrinsic immunity. In addition, the system can  
1508 increase the efficiency of gene editing and cause ICD under US irradiation. This  
1509 “cocktail therapy” can effectively activate immune cells to eliminate the primary  
1510 tumor and inhibit tumor metastasis and recurrence.

1511

1512 *Specific comments:*

1513 *1. Attributing to the intrinsic targeting ability of LGG, it is believed that HMME and*  
1514 *CRISPR/Cas9 system loaded within the ZIF-8 nanoparticles would be primarily*  
1515 *delivered to the hypoxic tumor region. Therefore, I want to know if the hypoxic*  
1516 *condition would diminish the sonosensitization efficacy of HMME under US exposure.*

1517 **Response:** Thanks very much for your kind question. Oxygen insufficiency, known as  
1518 hypoxia, is a unique and intrinsic feature of most malignancies caused by aggressive



1519 cell proliferation and dysfunctional angiogenesis. Hypoxia plays a crucial role in  
1520 hostile tumor microenvironment (TME) and greatly influences the therapeutic  
1521 outcome of treatments in which oxygen is a key factor in killing tumors. Given the  
1522 critical role of hypoxia in tumor progression and its resistance to treatment, many  
1523 efforts have been made to overcome the limitations associated with hypoxia regarding  
1524 tumors. These approaches can be roughly classified into three categories: <sup>83</sup> (a) The  
1525 use of oxygen supplementation strategies to alleviate tumor hypoxia by improving  
1526 intratumoral blood flow, utilizing hostile TME at the molecular level, generating  
1527 oxygen in situ, delivering exogenous oxygen to the tumor, or reducing oxygen  
1528 consumption during treatment<sup>84-87</sup>, (b) The development of some innovative oxygen  
1529 reduction dependent therapeutic modalities or combining one or more of these  
1530 approaches with some other non-oxygen dependent cancer therapies<sup>88-90</sup>, and (c)  
1531 exploiting inherent tumor hypoxia and post-treatment amplified hypoxia, which is  
1532 then combined with some hypoxia-activated bioreduction therapies, hypoxia-sensitive  
1533 molecules in nanoscale carriers, or cancer starvation therapies<sup>91-93</sup>. Hypoxic  
1534 conditions certainly reduce the efficacy of acoustic sensitization of HMME under US  
1535 irradiation.

1536 Our strategy, however, is to use LGG as a hypoxia-responsive component,  
1537 leading to tumor accumulation of LGG and thus to massive enrichment of MHS in  
1538 tumors, compensating at the quantitative level for the lack of efficiency of ROS  
1539 production due to tumor hypoxic microenvironment. In addition, since our drug  
1540 administration and US application are performed on alternate days, the exacerbation  
1541 of hypoxia due to ROS production will inevitably lead to LGG enrichment, ultimately  
1542 achieving high specificity as well as synergistic anti-cancer efficiency of the LGG-  
1543 MHS nanosystem. Therefore, the LGG-MHS nanosystem could be considered as a  
1544 comprehensive self-feedback therapeutic process, resulting in integrated anticancer  
1545 efficacy as well as higher therapeutic efficacy.

1546

1547 2. Actually, diverse small molecule *IDO1* inhibitors have been developed to reverse  
1548 tumor immunosuppression by restricting the production of Kyn. Therefore, I would  
1549 like to suggest the authors to describe the advantages of the presented strategies.

1550 **Response:** Thank you very much for the kind comments. Indoleamine-2,3-  
1551 dioxygenase-1 (*IDO1*) is an endogenous immunosuppressive mediator that stimulates  
1552 the accumulation of FOXP3<sup>+</sup> Tregs and suppresses T-cell activity by depleting Trp in  
1553 the microenvironment. Thus, *IDO1* is a potential immunotherapeutic target to  
1554 reprogram TIME by improving amino acid metabolism. Nevertheless, small molecule  
1555 inhibitors generally do not provide durable responses due to the presence of drug  
1556 resistance<sup>29-33</sup>. A number of compounds have been reported in the relevant patent  
1557 literature, but no inhibitors have been marketed. The promising efficacy in animal  
1558 models has also greatly contributed to the advancement of clinical trials of *IDO*  
1559 inhibitors, but the clinical performance of *IDO* inhibitors has fallen short of  
1560 expectations<sup>94</sup>. Therefore, there is an urgent need for alternative approaches to  
1561 interfere with amino acid metabolism to reprogram the TIME of cancer  
1562 immunotherapy.

1563 The evolution of gene editing technologies for (CRISPR)/CRISPR-associated  
1564 protein 9 (Cas9) is seen as an innovative approach to solve a variety of intractable  
1565 biomedical problems, ushering in a promising new era in biology and medicine.<sup>95-98</sup>  
1566 CRISPR/Cas9 gene editing systems show great potential in biomedical fields,  
1567 including disease model construction, disease therapy, and gene function research<sup>99-102</sup>.

1568 CRISPR/Cas9, as an emerging genome editing technology, has the advantages of  
1569 simple design, high specificity and high efficiency, bringing a breakthrough in the  
1570 regulation and application of targeted genome modification and showing broad  
1571 application prospects in biomedicine<sup>34</sup>. In our strategy, after the entry of MHS into  
1572 tumor cells, Cas9/sgRNA escapes from the lysosome under irradiation of US and is  
1573 translocated to the nucleus for efficient *IDO1* knockdown, inhibiting the expression of  
1574 *IDO* protein from the source, eliminating the defects such as drug resistance that

1575 exists in small molecule inhibitors, thereby reducing the aggregation of Treg cells in  
1576 the tumor microenvironment.

1577 According to the reviewer's comment, we have added the following brief  
1578 description of the current status of IDO small molecule inhibitors in the Revised  
1579 Manuscript to justify this approach, which reads: "Thus, *IDO1* is a potential  
1580 immunotherapeutic target to reprogram the TIME by improving amino acid  
1581 metabolism. Nevertheless, small molecule inhibitors generally cannot provide durable  
1582 responses due to the presence of drug resistance, and a phase III clinical trial of IDO  
1583 inhibitor combination therapy was declared a failure." (Line 64-68, Page 2, Revised  
1584 **Manuscript**)

1585

1586 *3. Based on the results shown in Figure 2, the pore size of the obtained MH and MHS*  
1587 *nanoparticles with typical ZIF-8 morphology is very small. Therefore, I want to know*  
1588 *how CRISPR/Cas9 systems were loaded. Besides, would the loading process*  
1589 *negatively impair the biological activity of loaded CRISPR/Cas9 system? Did the US*  
1590 *irradiation promoted generation of ROS negatively the biological activity of*  
1591 *CRISPR/Cas9 systems.*

1592 **Response:** Thank you very much for the kind questions and comments. Metal-organic  
1593 frameworks (MOFs), consisting of metal or cluster nodes linked by organic ligands,  
1594 have emerged as a promising platform for biomedical applications due to their highly  
1595 porous structure, friendliness to various functionalization methods, and excellent  
1596 biocompatibility and biodegradability<sup>60, 61</sup>.

1597 Related studies have shown that due to the open porous structure, available metal  
1598 or organic active sites, and good thermal and chemical stability of MOFs, various  
1599 drugs/large/small molecules are mainly three methods of binding to MOFs: grafting,  
1600 permeation and encapsulation<sup>20</sup>. It has been reported that biomacromolecules such as  
1601 enzymes may be encapsulated within MOFs *via* two general strategies: by assembling

1602 the MOF around the enzyme (which term de novo encapsulation) or by introducing  
1603 the enzyme into the pre-existing MOF (which term post-synthetic encapsulation).  
1604 (Enzyme encapsulation in metal – organic frameworks for applications in catalysis).  
1605 Zinc 2-methylimidazole (ZIF-8), a nanoscale metal – organic framework with  
1606 excellent biocompatibility, has unique features in biomacromolecules condensing and  
1607 chemical drug-loading efficiency due to its positive charge and high surface ratio.  
1608 More importantly, the acidic environment of endosomes/lysosomes can trigger the  
1609 degradation of ZIF-8 hosts, which can facilitate cargo escape from  
1610 endosomes/lysosomes to the cytosol<sup>61, 62</sup>.

1611 Our strategy firstly employs one-step encapsulation approach to encapsulate  
1612 HMME into the interior of ZIF-8. The HMME was dropwise into the  
1613 dimethylimidazole solution stirred for 10 min before the addition of zinc nitrate  
1614 hexahydrate. The material after encapsulating HMME with ZIF-8 (MOF) is named  
1615 MH. Second, MH was incubated with Cas9/sgRNA to form MHS. In summary,  
1616 HMME is encapsulated into the interior of ZIF-8 during the synthesis process. In  
1617 contrast, Cas9/sgRNA is partially internalized into the interior of MH and partially  
1618 grafted onto the surface of MH after incubation with MH, resulting in MHS. Revised  
1619 Manuscript Figure 2b and Supplementary Figure 2c show that the average pore size of  
1620 MHS decreased relative to ZIF-8, demonstrating that some Cas9/sgRNA penetrated  
1621 into the interior of MH. Revised Manuscript Figure 2e shows that the particle size of  
1622 MHS slightly increases compared to MH, which proves that some Cas9/sgRNA is  
1623 also grafted on the surface of MH. Finally, Revised Manuscript Figure 2d  
1624 demonstrates that the elemental mapping of MHS corresponds to a more dense P-  
1625 element compared to ZIF-8 and MH, which further suggests that MH was  
1626 successfully loaded with Cas9/sgRNA. Therefore, the final MH and Cas9/sgRNA  
1627 formed the MHS complex.

1628 The detailed MHS experimental procedure been provided in the revised  
1629 manuscript according to the reviewer’s kind question, which reads “2-  
1630 Methylimidazole (1.910 g) and zinc nitrate solution (1.314 g) were dissolved in

1631 methanol (20 mL), respectively. Hematoporphyrin monomethyl ether (HMME, 200  
1632  $\mu\text{L}$ , 2 mg/mL) was slowly added to 2-methylimidazole solution under mechanical  
1633 stirring at room temperature, and after 10 min, zinc nitrate solution was added  
1634 dropwise. The MH was obtained after stirring for 24 h at room temperature. Then, the  
1635 MH and CRISPR/Cas9 system (mass ratio 4:1) were incubated at 37 ° C according to  
1636 the methodology instructions, finally, the integration of MHS nanosystem was  
1637 constructed. The obtained product was gathered by centrifugation and washed with  
1638 ddH<sub>2</sub>O for three times to remove the residuum.” (Line 568-575, Page 19, Revised  
1639 Manuscript).

1640 According to the reviewer’s suggestion, the more detailed distributions of the  
1641 effect of loading process on the activity of CRISPR/Cas9 nanosystem have been  
1642 further recorded and the data have been supplemented in the revised manuscript.  
1643 (Line 583-586, Page 19, Revised Manuscript).

1644 To investigate the effect of the loading process on the activity of the  
1645 CRISPR/Cas9 nanosystem. Different states of Cas9/sgRNA (including Cas9/sgRNA  
1646 Only, MHS, MHS + US, LGG-MHS, LGG-MHS + US) were incubated in acidic PBS  
1647 (pH = 5) for 6 h, and then incubated by quantitative extraction of equal amounts of  
1648 Cas9/sgRNA with target DNA fragments, and finally agarose gel electrophoresis was  
1649 performed. The results are shown in Supplementary Figure 2k, l. Quantitative analysis  
1650 of the cut bands indicates that with the loading process or the application of US, the  
1651 activity of Cas9/sgRNA is maintained at a high level, although a slight decrease  
1652 occurs.

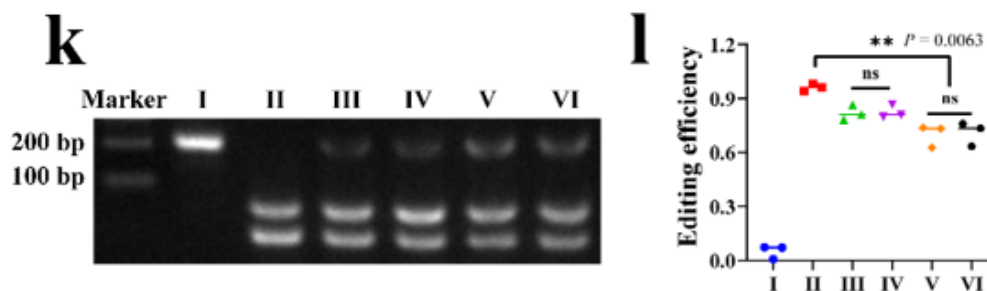

1653

1654 **Supplementary Figure 2.** (k) Agarose gel electrophoresis and (l) corresponding quantitative  
1655 analysis of the activity of CRISPR/Cas9 nanosystem under different states, including I (DNA  
1656 Only), II (Cas9/sgRNA + DNA), III (MHS + DNA), IV (MHS + US + DNA), V (LGG-MHS +  
1657 DNA), VI (LGG-MHS + US + DNA). ( $n = 3$ ) \* $P < 0.05$ , \*\* $P < 0.01$ , \*\*\* $P < 0.001$ , \*\*\*\* $P <$   
1658  $0.0001$ .

1659

1660 *4. The authors are suggested to describe the methods used for the loading of MHS*  
1661 *nanoparticle onto the surfaced of LGG. Besides, Did the MHS nanoparticles loading*  
1662 *impact the colonization behaviors of LGG.*

1663 **Response:** Thank you for your constructive comments. According to the reviewer's  
1664 suggestion, the more detailed methods used for the loading of MHS nanoparticle onto  
1665 the surface of LGG have been supplemented in the revised manuscript, which reads  
1666 "The obtained product was gathered by centrifugation and washed with ddH<sub>2</sub>O for  
1667 three times to remove the residuum. MHS was further stirred with LGG (PBS = 1mL,  
1668 LGG =  $1 \times 10^7$  CFU, MHS = 1 mg) in PBS for 24 h to arrangement LGG-MHS.  
1669 **(Line 574-576, Page 19, Revised Manuscript).**

1670 In addition, according to the reviewer's suggestion, we investigated the activity  
1671 of LGG loaded with different concentrations of MHS. The related experimental  
1672 procedures and data have been supplemented in the revised manuscript, which reads:  
1673 " $1 \times 10^7$  CFU LGG in PBS without stirring was set as the control group,  $1 \times 10^7$  LGG  
1674 in PBS with different concentrations of MHS (0 mg/mL, 0.5 mg/mL, 1 mg/mL, 2  
1675 mg/mL, 4 mg/mL) and given mechanical stirring was set as the experimental group.  
1676 After various times (0, 6, 12, 24 h) the groups were coated on MRS agar plates (100  
1677  $\mu$ L taken after 100-fold dilution)" As shown in Supplement Materials Figure 2m-n,  
1678 the effect on LGG activity was not statistically significant when the concentration of  
1679 MHS was 2 mg/mL, whereas the CFU decreased substantially when the concentration  
1680 of MHS reached 4 mg/mL. The results indicate that the concentration of LGG loaded  
1681 MHS (1 mg/mL) in our strategy does not negatively affect the activity of LGG. **(Line**  
1682 **587-592, Page 19, Revised Manuscript)**

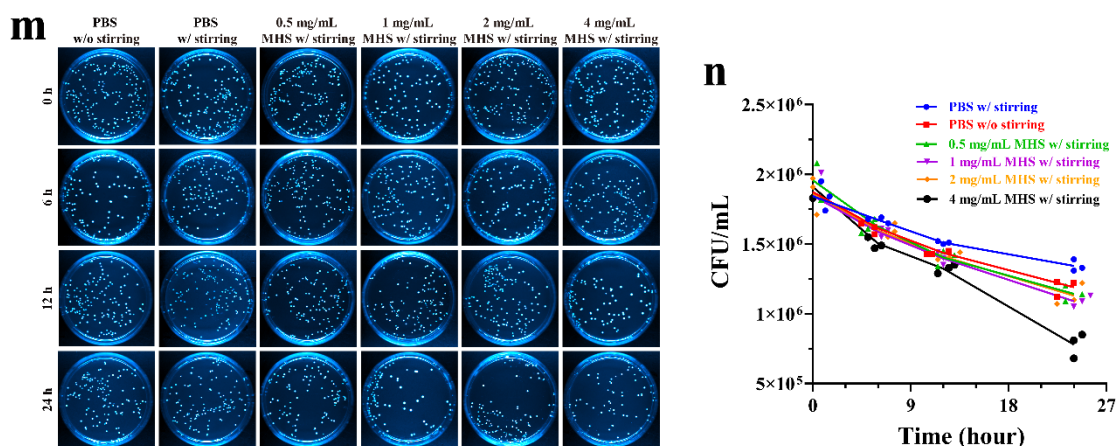

1683  
 1684 **Supplementary Figure 2.** (m) Representative photographs and (n) corresponding CFU  
 1685 quantitative of MRS agar plates of bacterial activity with various concentrations of MHS in a  
 1686 different time (0, 2, 6, 12 and 24 h) ( $n = 3$ ).

1687

1688 5. In Figure 3e, it was shown that the flow cytometric plot of MHS and US treated  
 1689 cells was distinct from the typical apoptotic cancer cells. Please double check. Maybe  
 1690 the combination treatment could not induce apoptosis since it has been well  
 1691 documented that apoptosis of cancer cells is not the immunogenic cell death because  
 1692 it could not promote the expression of CRT, release of HMGB1.

1693 **Response:** Thank you for your constructive comments. We have reanalyzed the flow  
 1694 cytometric data from the original Figure 3e, and the related data have been updated in  
 1695 the Revised Manuscript Fig. 3e<sup>103-105</sup>.

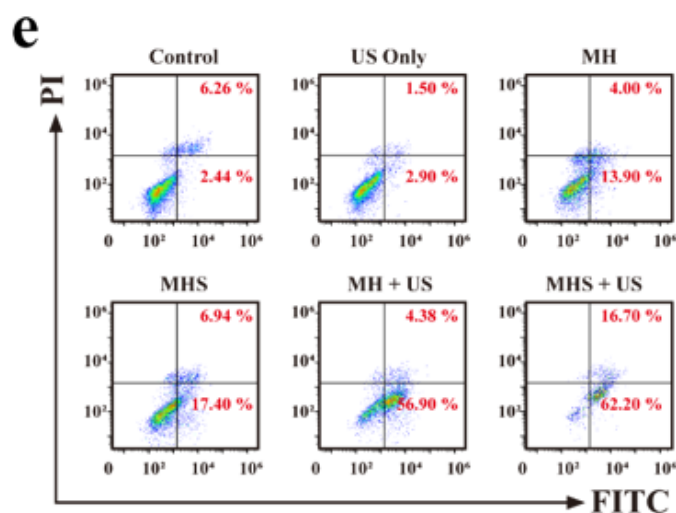

1696



1697 **Fig. 3** (e) Flow cytometry analysis of apoptosis of 4T1 cells with various treatments, including  
1698 control, US only, MH, MH + US, MHS, and MHS + US.

1699 Apoptosis of normal cancer cells is certainly not all about immunogenic cell  
1700 death, so those cells that die non-immunogenically do not promote the release of CRT  
1701 and HMGB1. There is growing evidence that ultrasound-activated sonosensitizers can  
1702 cause apoptosis/necrosis of tumor cells, which then elicit some degree of immune  
1703 response by generating tumor-associated neoantigens.<sup>78-80</sup> It has also been shown that  
1704 when cells are subjected to microenvironmental stimuli or dysregulation of the  
1705 antioxidant system to generate an excess of ROS, the production of intracellular ROS  
1706 can disrupt the integrity of macromolecular biology, cause cellular damage, generate  
1707 oxidative stress, have damaging effects on intracellular mitochondrial DNA and  
1708 induce apoptosis<sup>81, 82</sup>.

1709 Therefore, our strategy is to use the MHS nanosystem upon US irradiation to  
1710 generate ROS, which induces ICD, *i.e.*, triggers ER stress response, and dying tumor  
1711 cells release tumor antigens and present them to DCs, while releasing DAMPs from  
1712 intracellular cells to promote maturation of immature DCs and enhance the ability of  
1713 DCs to recognize the presented antigens. The mature DCs enter the lymph nodes,  
1714 present tumor antigens to T lymphocytes and activate T cells, which become effector  
1715 T cells (*e.g.* CD4<sup>+</sup> T cells, CD8<sup>+</sup> T cells). The dying tumor cells release tumor  
1716 antigens and present them to the DCs, while releasing DAMPs from the cells, which  
1717 promote the maturation of immature DCs and enhance the ability of DCs to recognize  
1718 the presented antigens. When ICD occurs, dying tumor cells release immune signaling  
1719 molecules, collectively known as DAMPs, which include CRT exposed on the cell  
1720 surface and high mobility group protein 1 (HMGB1) released outside the cell nucleus.

1721

1722 *6. The authors are suggested to explain why the treatment of MHS plus US was more*  
1723 *efficient than the treatment of MH plus US in promoting the immunogenic cell death*  
1724 *of 4T1 cancer cells. Besides, the authors are suggested to explain the mechanism of*

1725 such combination treatment in promoting the expression of HSP70.

1726 **Response:** Thank you for your constructive comments. According to the  
1727 reviewer's suggestion, the quantification of the WB bands and statistical analysis of  
1728 the CLSM fluorescence intensity quantification have been performed. It was found  
1729 that there was no significant difference in the ability of MHS + US and MH + US to  
1730 trigger the ICD. The related experimental details have been provided in the revised  
1731 manuscript according to the reviewer's kind suggestions. (Fig. 4a-d, Page 34,  
1732 Revised Manuscript and Supplementary Figure 5, Page 12, Revised  
1733 Supplementary Information)

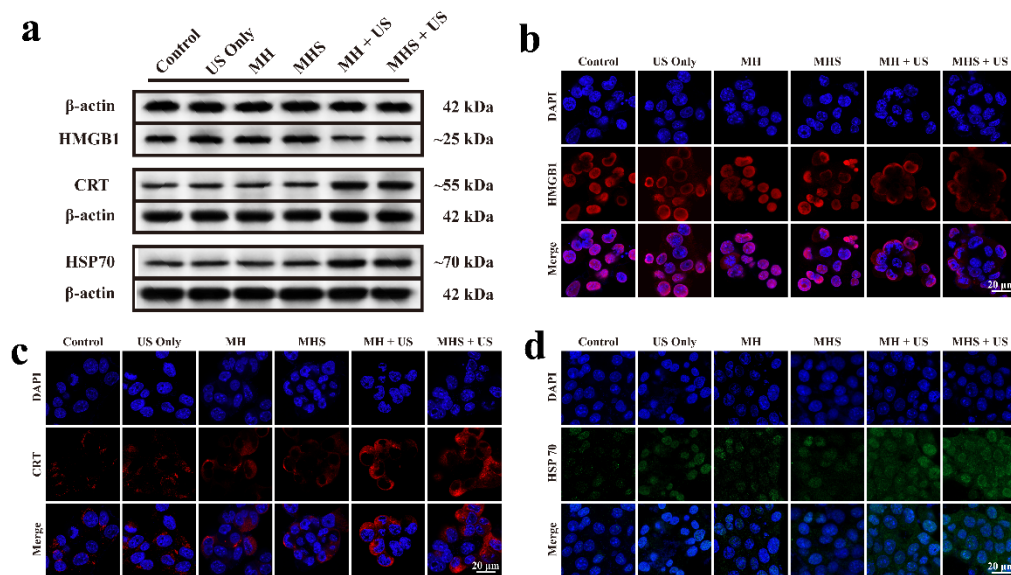

1734

1735 **Fig. 4 ICD facilitates antitumor immunity against 4T1 cells *in vitro*.** (a) Western blot analysis of specific proteins expression after DAMPs (HMGB1, CRT and HSP70). 4T1 cells were left  
1736 untreated, treated with US only, co-incubated with MH, MHS, MH + US and MHS + US.  
1737 Concentration = 100  $\mu$ g/mL. Incubation time = 12 h ( $n = 4$ ). (b-d) Immunofluorescence analysis of specific proteins expression after DAMPs, including HMGB1 (red), CRT (red) and HSP70 (green).  
1738 4T1 cells were left untreated, treated with US only, co-incubated with MH, MHS, MH + US and  
1739 MHS + US. DAPI was used to stain the nucleus of the cell (blue) ( $n = 3$ ).  
1740  
1741

1742

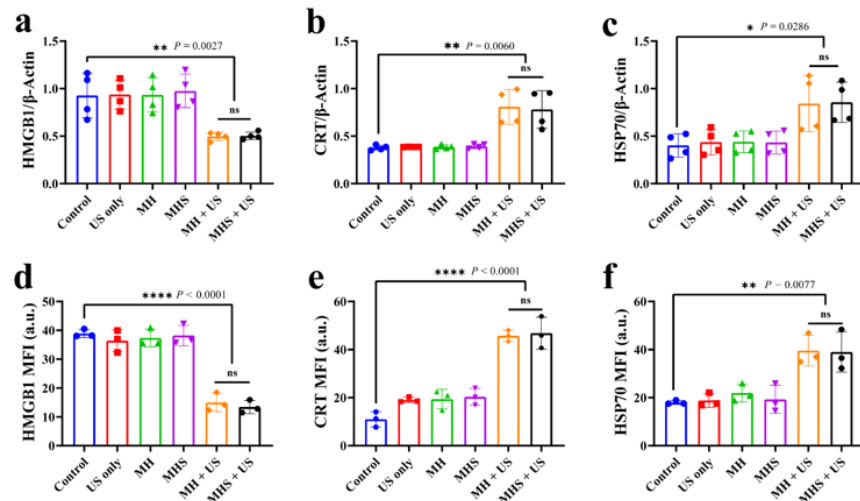

1743

1744 **Supplementary Figure 5.** (a-c) The quantitative analysis of HMGB1, CRT and HSP70 on  
 1745 Western Blot. (n = 4). \* $P < 0.05$ , \*\* $P < 0.01$ , \*\*\* $P < 0.001$ , \*\*\*\* $P < 0.0001$ . (d-f) Fluorescence  
 1746 intensity of HMGB1, CRT and HSP70 on CLSM (n = 3). \* $P < 0.05$ , \*\* $P < 0.01$ , \*\*\* $P < 0.001$ ,  
 1747 \*\*\*\* $P < 0.0001$ .

1748

1749 Related researches have shown that Heat shock proteins (HSPs) are a conserved  
 1750 family of chaperone proteins that function under physiological and environmental  
 1751 stress. HSP70 is involved in the regulation of essential cellular processes such as  
 1752 signal transduction, cell cycle regulation, apoptosis and innate immunity<sup>106-108</sup>. One  
 1753 mechanism of cellular protection from the adverse consequences of ROS action is  
 1754 provided by highly conserved heat shock proteins (HSPs), which are ubiquitously  
 1755 expressed intracellular stress proteins<sup>109, 110</sup>. These molecular chaperones are involved  
 1756 in proper protein folding and utilization, preventing protein aggregation and providing  
 1757 cellular resistance to stress. It was shown that the JAK/STAT pathway mediates H<sub>2</sub>O<sub>2</sub>-  
 1758 induced HSP70 expression, which contributes to cellular adaptation to oxidative  
 1759 stress<sup>111, 112</sup>. In our strategy, HMME in the MHS were irradiated with US to produce  
 1760 an abundance of ROS (Figure 3a, Page 33 Revised Manuscript), which in turn  
 1761 caused tumors to develop ICDs, and the secreted DAMPs included the  
 1762 aforementioned HSP70.

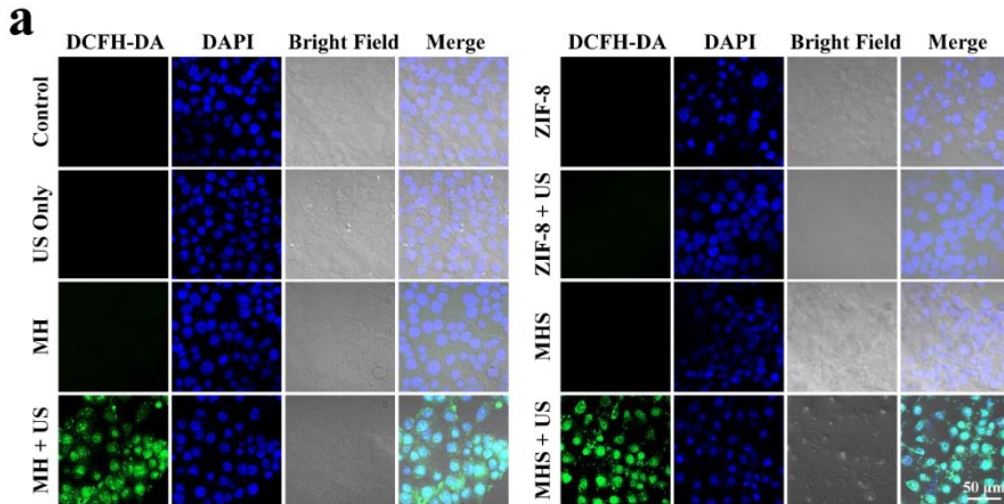

1763

1764 **Fig. 3 Evaluation of US-associated *IDO1* genome editing *in vitro*.** (a) CLSM images of 4T1  
 1765 cells with different treatments (including Control, US only, ZIF-8, ZIF-8 + US, MH, MH + US,  
 1766 MHS and MHS + US). Concentration = 100  $\mu\text{g/mL}$ . Incubation time = 12 h. ( $n = 3$ )

1767

1768 7. In figure 4h, the flow cytometric patter of these maturated BMDCs is quite different  
 1769 from those published ones. Please double check.

1770 **Response:** Thank you very much for the kind reminding, which is highly appreciated.  
 1771 After careful examination of the flow cytometry for these mature BMDCs and  
 1772 reanalysis of the data based on the reviewers' suggestions, we have provided the  
 1773 relevant results in the Figure 4g of Revised Manuscript, as described below<sup>103, 113, 114</sup>:

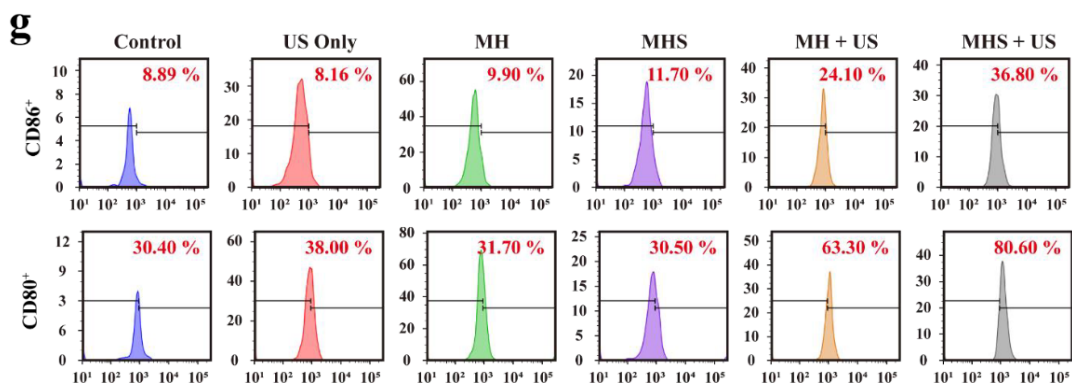

1774

1775 **Fig. 4 ICD facilitates antitumor immunity against 4T1 cells *in vitro*.** (g) Representative flow  
 1776 cytometry plots and statistical data of maturated BMDCs ( $\text{CD80}^+\text{CD86}^+\text{CD11c}^+$ ) after various  
 1777 treatments, including control, US only, MH, MH + US, MHS and MHS + US. ( $n = 3$ ).

1778

1779 8. In Figure 7c and S25, the gating strategy used for analyzing the percentages of  
1780 CD4<sup>+</sup>Foxp3<sup>+</sup> Tregs was not correct. Please reanalyze the results. Besides, it seems  
1781 that the gate strategies shown in Figure S25 were not the standard ones.

1782 **Response:** Thank you very much for the kind reminding, which is highly appreciated.  
1783 After carefully checking the gating strategy used for analyzing the percentages of  
1784 CD4<sup>+</sup>Foxp3<sup>+</sup> Tregs, we have found that the methods and results are inappropriate.  
1785 According to the reviewer's questions, appropriate gate strategies was performed to  
1786 investigate the population of Tregs (CD3<sup>+</sup>CD4<sup>+</sup>Foxp3<sup>+</sup>)<sup>111, 115</sup>. The rest of the flow  
1787 cytometry in the original manuscript Figure 7c and S25 was reanalyzed as well<sup>114, 116-</sup>  
1788 <sup>120</sup>. The related result and gating strategy is as follows:

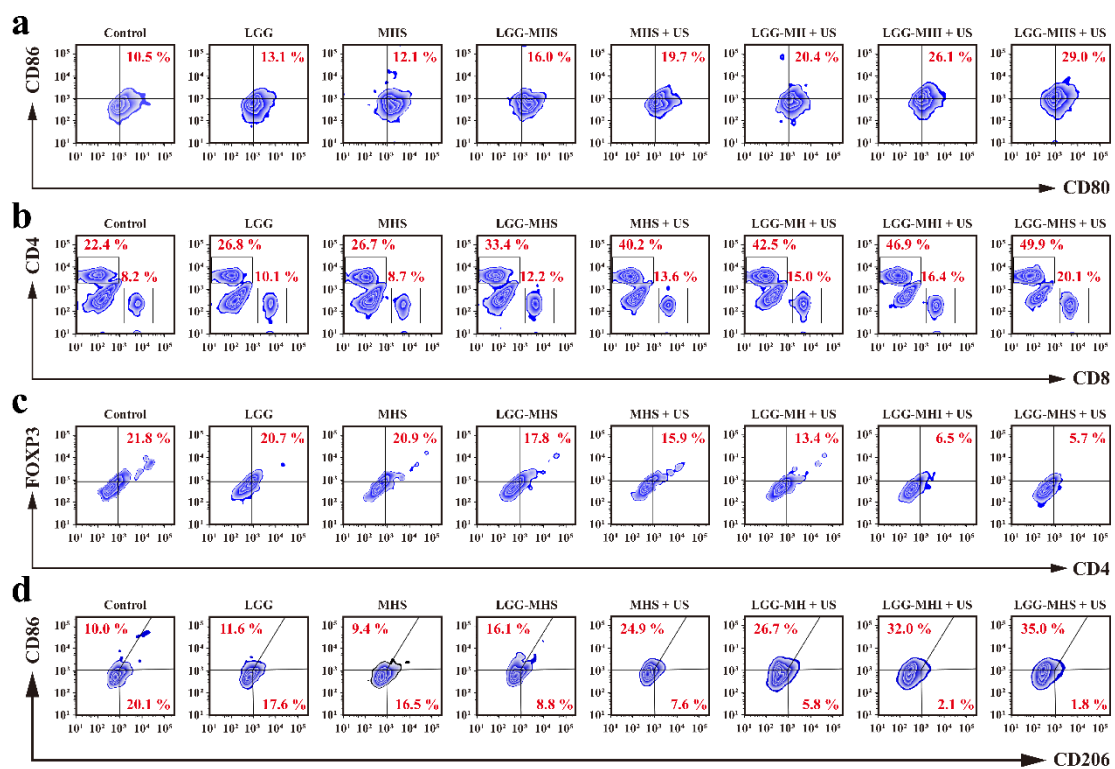

1789

1790 **Fig. 7. Reprogramming of the tumor immunosuppressive microenvironment by the self-driven**  
1791 **LGG-MHS+US nanosystem.** (a) Typical flow cytometric of mature DCs in tumor tissue after 24  
1792 h after the first different treatments ( $n = 3$ ). (b) Typical flow cytometric of T cells of CD4<sup>+</sup> and  
1793 CD8<sup>+</sup> T cells in the spleen after 24 h after the first different treatments ( $n = 3$ ). (c) Typical flow  
1794 cytometric of Tregs in primary tumor tissue after 24 h after the first different treatments ( $n = 3$ ). (d)  
1795 Representative flow cytometric of M2 macrophages in spleen after 24 h after the first different

1796 treatments ( $n = 3$ ).

1797

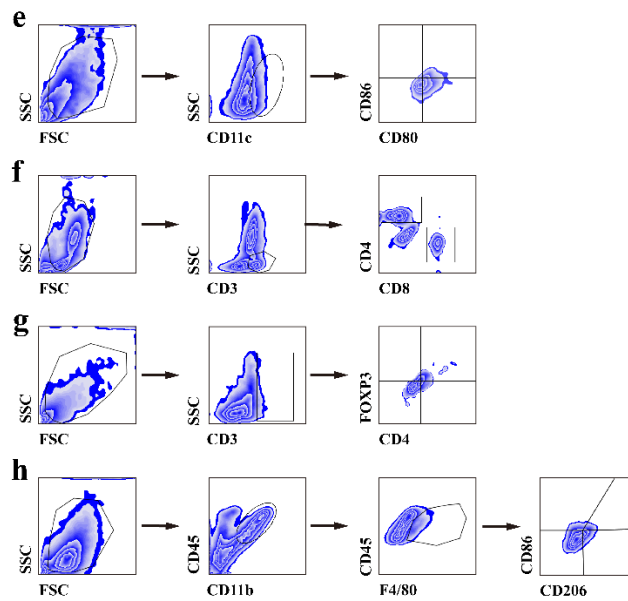

1798

1799 **Supplementary Figure 10.** (e) Gating strategies for isolating CD80<sup>+</sup>CD86<sup>+</sup> mature DCs from  
1800 tumor tissue. (f) Gating strategies for isolating CD4<sup>+</sup> and CD8<sup>+</sup> T cells from spleen tissue. (g)  
1801 Gating strategies for isolating Tregs from tumor tissue. (h) Gating strategies for isolating M2  
1802 macrophages from spleen tissue.

1803

1804 9. The font size of Figure 6b was too small. Please reformat the figure.

1805 **Response:** Thank you very much for pointing this issue out. We have carefully  
1806 reformatted the size figure to make them look comfortable.

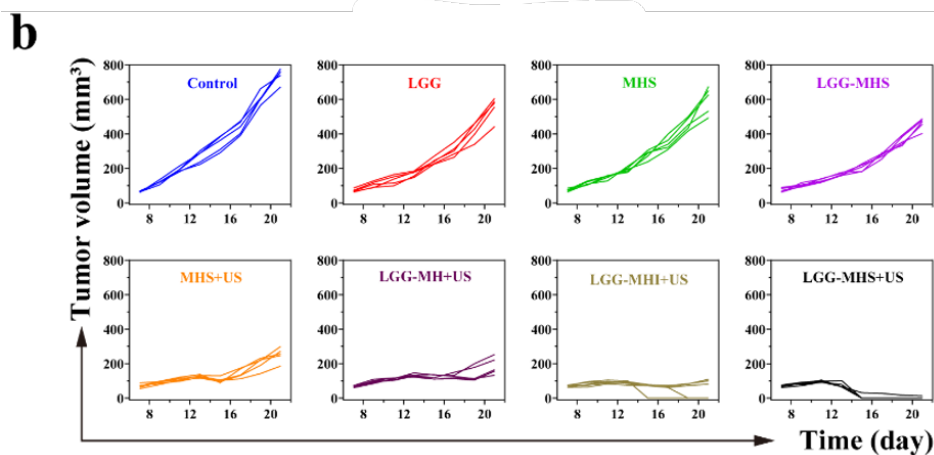

1807

1808 **Fig. 6 LGG-MHS + US against 4T1 tumor *in vivo*.** (b) Tumor growth curves of 4T1 after being  
1809 treated by PBS, LGG, MHS, LGG-MHS, MHS + US, LGG-MH + US, LGG-MHI + US and  
1810 LGG-MHS + US ( $n = 5$ ).

1811 Finally, we greatly appreciate and thank the reviewers' kind, professional and  
1812 constructive reminding, comments and suggestions for this manuscript. We have tried  
1813 our best to address all these issues as possible as we can. We sincerely hope that the  
1814 revised manuscript has addressed all the comments and suggestions as kindly raised  
1815 by the reviewers and meet the publication standard of *Nature Communications*.  
1816 Thank you very much.

1817

## 1818 **References**

- 1819 1. Joyce JA, *et al.* Microenvironmental regulation of metastasis. *Nat Rev Cancer*  
1820 **9**, 239-252 (2009).
- 1821 2. Correia AL, *et al.* The tumor microenvironment is a dominant force in  
1822 multidrug resistance. *Drug Resistance Updates : Reviews and Commentaries*  
1823 *In Antimicrobial and Anticancer Chemotherapy* **15**, 39-49 (2012).
- 1824 3. Bissell MJ, *et al.* The organizing principle: Microenvironmental influences in  
1825 the normal and malignant breast. *Differentiation; Research In Biological*  
1826 *Diversity* **70**, 537-546 (2002).
- 1827 4. Kulkarni P, *et al.* Hypoxia responsive, tumor penetrating lipid nanoparticles  
1828 for delivery of chemotherapeutics to pancreatic cancer cell spheroids.  
1829 *Bioconjug Chem* **27**, 1830-1838 (2016).
- 1830 5. Kulkarni P, *et al.* Hypoxia-responsive polymersomes for drug delivery to  
1831 hypoxic pancreatic cancer cells. *Biomacromolecules* **17**, 2507-2513 (2016).
- 1832 6. Forbes NS. Engineering the perfect (bacterial) cancer therapy. *Nat Rev Cancer*  
1833 **10**, 785-794 (2010).
- 1834 7. Minton NP. Clostridia in cancer therapy. *Nat Rev Microbiol* **1**, 237-242 (2003).



- 1835 8. Van Mellaert L, *et al.* Clostridium spores as anti-tumour agents. *Trends*  
1836 *Microbiol* **14**, 190-196 (2006).
- 1837 9. Hoffman RM. Tumor-seeking salmonella amino acid auxotrophs. *Curr Opin*  
1838 *Biotechnol* **22**, 917-923 (2011).
- 1839 10. Taniguchi S, *et al.* Targeting solid tumors with non-pathogenic obligate  
1840 anaerobic bacteria. *Cancer Sci* **101**, 1925-1932 (2010).
- 1841 11. Triantafilou M, *et al.* Lipopolysaccharide recognition: Cd14, tlrs and the lps-  
1842 activation cluster. *Trends Immunol* **23**, 301-304 (2002).
- 1843 12. Dasari S, *et al.* Surfacing role of probiotics in cancer prophylaxis and therapy:  
1844 A systematic review. *Clin Nutr* **36**, 1465-1472 (2017).
- 1845 13. Nishikawa H, *et al.* In vivo antigen delivery by a salmonella typhimurium type  
1846 iii secretion system for therapeutic cancer vaccines. *J Clin Invest* **116**, 1946-  
1847 1954 (2006).
- 1848 14. Kim JE, *et al.* Salmonella typhimurium suppresses tumor growth via the pro-  
1849 inflammatory cytokine interleukin-1beta. *Theranostics* **5**, 1328-1342 (2015).
- 1850 15. Hu Q, *et al.* Engineering nanoparticle-coated bacteria as oral DNA vaccines  
1851 for cancer immunotherapy. *Nano Lett* **15**, 2732-2739 (2015).
- 1852 16. Chandra D, *et al.* Myeloid-derived suppressor cells have a central role in  
1853 attenuated listeria monocytogenes-based immunotherapy against metastatic  
1854 breast cancer in young and old mice. *Br J Cancer* **108**, 2281-2290 (2013).
- 1855 17. Wang Y, *et al.* An lgg-derived protein promotes iga production through  
1856 upregulation of april expression in intestinal epithelial cells. *Mucosal Immunol*  
1857 **10**, 373-384 (2017).
- 1858 18. Seow SW, *et al.* Lactobacillus rhamnosus gg induces tumor regression in mice  
1859 bearing orthotopic bladder tumors. *Cancer Sci* **101**, 751-758 (2010).
- 1860 19. McKinlay AC, *et al.* Biomofs: Metal-organic frameworks for biological and  
1861 medical applications. *Angew Chem Int Ed Engl* **49**, 6260-6266 (2010).
- 1862 20. Doonan C, *et al.* Metal-organic frameworks at the biointerface: Synthetic  
1863 strategies and applications. *Acc Chem Res* **50**, 1423-1432 (2017).

- 1864 21. Alsaiari SK, *et al.* Endosomal escape and delivery of crispr/cas9 genome  
1865 editing machinery enabled by nanoscale zeolitic imidazolate framework. *J Am*  
1866 *Chem Soc* **140**, 143-146 (2018).
- 1867 22. Guo X, *et al.* Multifunctional nanoplatforms for subcellular delivery of drugs  
1868 in cancer therapy. *Progress in Materials Science* **107**, (2020).
- 1869 23. Guo L, *et al.* Radicals scavenging mofs enabling targeting delivery of sirna for  
1870 rheumatoid arthritis therapy. *Small* **18**, e2202604 (2022).
- 1871 24. Chen J, *et al.* Metal-phenolic coatings as a platform to trigger endosomal  
1872 escape of nanoparticles. *ACS Nano* **13**, 11653-11664 (2019).
- 1873 25. Rabiee N, *et al.* Recent advances in porphyrin-based nanocomposites for  
1874 effective targeted imaging and therapy. *Biomaterials* **232**, 119707 (2020).
- 1875 26. Deepagan VG, *et al.* Long-circulating au-tio2 nanocomposite as a  
1876 sonosensitizer for ros-mediated eradication of cancer. *Nano Lett* **16**, 6257-  
1877 6264 (2016).
- 1878 27. Yu T, *et al.* Anticancer potency of cytotoxic drugs after exposure to high-  
1879 intensity focused ultrasound in the presence of microbubbles and  
1880 hematoporphyrin. *Mol Pharm* **8**, 1408-1415 (2011).
- 1881 28. Ethirajan M, *et al.* The role of porphyrin chemistry in tumor imaging and  
1882 photodynamic therapy. *Chem Soc Rev* **40**, 340-362 (2011).
- 1883 29. Muller AJ, *et al.* Inhibition of indoleamine 2,3-dioxygenase, an  
1884 immunoregulatory target of the cancer suppression gene bin1, potentiates  
1885 cancer chemotherapy. *Nat Med* **11**, 312-319 (2005).
- 1886 30. Ladomersky E, *et al.* Idol inhibition synergizes with radiation and pd-1  
1887 blockade to durably increase survival against advanced glioblastoma. *Clin*  
1888 *Cancer Res* **24**, 2559-2573 (2018).
- 1889 31. Lemos H, *et al.* Immune control by amino acid catabolism during  
1890 tumorigenesis and therapy. *Nat Rev Cancer* **19**, 162-175 (2019).
- 1891 32. Konieczkowski DJ, *et al.* A convergence-based framework for cancer drug  
1892 resistance. *Cancer Cell* **33**, 801-815 (2018).

- 1893 33. Gottesman MM, *et al.* Toward a better understanding of the complexity of  
1894 cancer drug resistance. *Annu Rev Pharmacol Toxicol* **56**, 85-102 (2016).
- 1895 34. Konermann S, *et al.* Genome-scale transcriptional activation by an engineered  
1896 crispr-cas9 complex. *Nature* **517**, 583-588 (2015).
- 1897 35. Zou W. Immunosuppressive networks in the tumour environment and their  
1898 therapeutic relevance. *Nat Rev Cancer* **5**, 263-274 (2005).
- 1899 36. Joyce JA, *et al.* T cell exclusion, immune privilege, and the tumor  
1900 microenvironment. *Science* **348**, 74-80 (2015).
- 1901 37. Phuengkham H, *et al.* Nanoengineered immune niches for reprogramming the  
1902 immunosuppressive tumor microenvironment and enhancing cancer  
1903 immunotherapy. *Adv Mater* **31**, e1803322 (2019).
- 1904 38. Xie S, *et al.* Doxorubicin-conjugated escherichia coli nissle 1917 swimmers to  
1905 achieve tumor targeting and responsive drug release. *J Control Release* **268**,  
1906 390-399 (2017).
- 1907 39. Du JZ, *et al.* Tailor-made dual ph-sensitive polymer-doxorubicin nanoparticles  
1908 for efficient anticancer drug delivery. *J Am Chem Soc* **133**, 17560-17563  
1909 (2011).
- 1910 40. Du JZ, *et al.* Tumor extracellular acidity-activated nanoparticles as drug  
1911 delivery systems for enhanced cancer therapy. *Biotechnol Adv* **32**, 789-803  
1912 (2014).
- 1913 41. Li Y, *et al.* Delivery of nanomedicines to extracellular and intracellular  
1914 compartments of a solid tumor. *Adv Drug Deliv Rev* **64**, 29-39 (2012).
- 1915 42. Doherty GJ, *et al.* Mechanisms of endocytosis. *Annu Rev Biochem* **78**, 857-  
1916 902 (2009).
- 1917 43. Zhang X, *et al.* Persistence and recovery of zif-8 and zif-67 phytotoxicity.  
1918 *Environ Sci Technol* **55**, 15301-15312 (2021).
- 1919 44. Wu W, *et al.* Microbiotic nanomedicine for tumor-specific chemotherapy-  
1920 synergized innate/adaptive antitumor immunity. *Nano Today* **42**, (2022).
- 1921 45. Tannock IF, *et al.* Acid ph in tumors and its potential for therapeutic  
1922 exploitation. *Cancer Res* **49**, 4373-4384 (1989).

- 1923 46. Stubbs M, *et al.* Causes and consequences of tumour acidity and implications  
1924 for treatment. *Mol Med Today* **6**, 15-19 (2000).
- 1925 47. Chen B, *et al.* Current multistage drug delivery systems based on the tumor  
1926 microenvironment. *Theranostics* **7**, 538-558 (2017).
- 1927 48. Tekade RK, *et al.* The warburg effect and glucose-derived cancer theranostics.  
1928 *Drug Discov Today* **22**, 1637-1653 (2017).
- 1929 49. Borkowska M, *et al.* Targeted crystallization of mixed-charge nanoparticles in  
1930 lysosomes induces selective death of cancer cells. *Nat Nanotechnol* **15**, 331-  
1931 341 (2020).
- 1932 50. Zhang J, *et al.* Immunostimulant hydrogel for the inhibition of malignant  
1933 glioma relapse post-resection. *Nat Nanotechnol* **16**, 538-548 (2021).
- 1934 51. Hu X, *et al.* A novel modulation of structural and functional changes of mouse  
1935 bone marrow derived dendritic cells (bmdcs) by interleukin-2(il-2). *Hum*  
1936 *Vaccin Immunother* **11**, 516-521 (2015).
- 1937 52. Robb RJ, *et al.* Heterogeneity of human t-cell growth factor(s) due to variable  
1938 glycosylation. *Mol Immunol* **18**, 1087-1094 (1981).
- 1939 53. Smith KA, *et al.* Production and characterization of monoclonal antibodies to  
1940 human interleukin 2: Strategy and tactics. *J Immunol* **131**, 1808-1815 (1983).
- 1941 54. Tahara H, *et al.* Antitumor effects of interleukin-12 (il-12): Applications for  
1942 the immunotherapy and gene therapy of cancer. *Gene Ther* **2**, 96-106 (1995).
- 1943 55. Thierfelder WE, *et al.* Requirement for stat4 in interleukin-12-mediated  
1944 responses of natural killer and t cells. *Nature* **382**, 171-174 (1996).
- 1945 56. Trinchieri G, *et al.* Natural killer cell stimulatory factor (nksf) or interleukin-  
1946 12 is a key regulator of immune response and inflammation. *Prog Growth*  
1947 *Factor Res* **4**, 355-368 (1992).
- 1948 57. Zeh HJ, 3rd, *et al.* Interleukin-12 promotes the proliferation and cytolytic  
1949 maturation of immune effectors: Implications for the immunotherapy of  
1950 cancer. *J Immunother Emphasis Tumor Immunol* **14**, 155-161 (1993).

- 1951 58. Chowdhury FZ, *et al.* Il-12 selectively programs effector pathways that are  
1952 stably expressed in human cd8+ effector memory t cells in vivo. *Blood* **118**,  
1953 3890-3900 (2011).
- 1954 59. Rotow J, *et al.* Understanding and targeting resistance mechanisms in nscl.  
1955 *Nat Rev Cancer* **17**, 637-658 (2017).
- 1956 60. Horcajada P, *et al.* Metal-organic frameworks in biomedicine. *Chem Rev* **112**,  
1957 1232-1268 (2012).
- 1958 61. He C, *et al.* Nanomedicine applications of hybrid nanomaterials built from  
1959 metal-ligand coordination bonds: Nanoscale metal-organic frameworks and  
1960 nanoscale coordination polymers. *Chem Rev* **115**, 11079-11108 (2015).
- 1961 62. Zheng H, *et al.* One-pot synthesis of metal-organic frameworks with  
1962 encapsulated target molecules and their applications for controlled drug  
1963 delivery. *J Am Chem Soc* **138**, 962-968 (2016).
- 1964 63. Venna SR, *et al.* Structural evolution of zeolitic imidazolate framework-8. *J*  
1965 *Am Chem Soc* **132**, 18030-18033 (2010).
- 1966 64. Saliba D, *et al.* Crystal growth of zif-8, zif-67, and their mixed-metal  
1967 derivatives. *J Am Chem Soc* **140**, 1812-1823 (2018).
- 1968 65. Zhai L, *et al.* Ido1 in cancer: A gemini of immune checkpoints. *Cell Mol*  
1969 *Immunol* **15**, 447-457 (2018).
- 1970 66. Inhibiting btk and ido enhances dendritic cell-mediated immune response.  
1971 *Cancer Discov* **11**, 2956 (2021).
- 1972 67. Munn DH, *et al.* Ido in the tumor microenvironment: Inflammation, counter-  
1973 regulation, and tolerance. *Trends Immunol* **37**, 193-207 (2016).
- 1974 68. Guo Y, *et al.* Indoleamine 2,3-dioxygenase (ido) inhibitors and their  
1975 nanomedicines for cancer immunotherapy. *Biomaterials* **276**, 121018 (2021).
- 1976 69. Cervenka I, *et al.* Kynurenines: Tryptophan's metabolites in exercise,  
1977 inflammation, and mental health. *Science* **357**, (2017).
- 1978 70. Stone TW, *et al.* An expanding range of targets for kynurenine metabolites of  
1979 tryptophan. *Trends Pharmacol Sci* **34**, 136-143 (2013).

- 1980 71. van der Goot AT, *et al.* Tryptophan metabolism: Entering the field of aging  
1981 and age-related pathologies. *Trends Mol Med* **19**, 336-344 (2013).
- 1982 72. Newman AC, *et al.* Immune-regulated ido1-dependent tryptophan metabolism  
1983 is source of one-carbon units for pancreatic cancer and stellate cells. *Mol Cell*  
1984 **81**, 2290-2302 e2297 (2021).
- 1985 73. Bender DA, *et al.* Utilization of tryptophan, nicotinamide and nicotinic acid as  
1986 precursors for nicotinamide nucleotide synthesis in isolated rat liver cells. *Br J*  
1987 *Nutr* **59**, 279-287 (1988).
- 1988 74. Liu H, *et al.* De-novo nad<sup>+</sup> synthesis regulates sirt1-foxo1 apoptotic pathway  
1989 in response to nqo1 substrates in lung cancer cells. *Oncotarget* **7**, 62503-  
1990 62519 (2016).
- 1991 75. Fiore A, *et al.* Kynurenine importation by slc7a11 propagates anti-ferroptotic  
1992 signaling. *Mol Cell* **82**, 920-932 e927 (2022).
- 1993 76. Zeitler L, *et al.* Anti-ferroptotic mechanism of il4i1-mediated amino acid  
1994 metabolism. *Elife* **10**, (2021).
- 1995 77. Thaker AI, *et al.* Idol metabolites activate beta-catenin signaling to promote  
1996 cancer cell proliferation and colon tumorigenesis in mice. *Gastroenterology*  
1997 **145**, 416-425 e411-414 (2013).
- 1998 78. Zhang Q, *et al.* Sonodynamic therapy-assisted immunotherapy: A novel  
1999 modality for cancer treatment. *Cancer Sci* **109**, 1330-1345 (2018).
- 2000 79. Galon J, *et al.* Approaches to treat immune hot, altered and cold tumours with  
2001 combination immunotherapies. *Nat Rev Drug Discov* **18**, 197-218 (2019).
- 2002 80. Nam J, *et al.* Cancer nanomedicine for combination cancer immunotherapy.  
2003 *Nature Reviews Materials* **4**, 398-414 (2019).
- 2004 81. Memar MY, *et al.* Antimicrobial use of reactive oxygen therapy: Current  
2005 insights. *Infect Drug Resist* **11**, 567-576 (2018).
- 2006 82. Qian X, *et al.* Micro/nanoparticle-augmented sonodynamic therapy (sdt):  
2007 Breaking the depth shallow of photoactivation. *Adv Mater* **28**, 8097-8129  
2008 (2016).

- 2009 83. Hu D, *et al.* Application of nanotechnology for enhancing photodynamic  
2010 therapy via ameliorating, neglecting, or exploiting tumor hypoxia. *View* **1**,  
2011 (2020).
- 2012 84. Hu D, *et al.* Activatable albumin-photosensitizer nanoassemblies for triple-  
2013 modal imaging and thermal-modulated photodynamic therapy of cancer.  
2014 *Biomaterials* **93**, 10-19 (2016).
- 2015 85. Xue Y, *et al.* Insight into cao2-based fenton and fenton-like systems: Strategy  
2016 for cao2-based oxidation of organic contaminants. *Chem Eng J* **361**, 919-928  
2017 (2019).
- 2018 86. Jiang W, *et al.* Tumor reoxygenation and blood perfusion enhanced  
2019 photodynamic therapy using ultrathin graphdiyne oxide nanosheets. *Nano Lett*  
2020 **19**, 4060-4067 (2019).
- 2021 87. Shi C, *et al.* Catalase-based liposomal for reversing immunosuppressive tumor  
2022 microenvironment and enhanced cancer chemo-photodynamic therapy.  
2023 *Biomaterials* **233**, 119755 (2020).
- 2024 88. Zhou W, *et al.* Iodine-rich semiconducting polymer nanoparticles for  
2025 ct/fluorescence dual-modal imaging-guided enhanced photodynamic therapy.  
2026 *Small* **16**, e1905641 (2020).
- 2027 89. Nguyen VN, *et al.* An emerging molecular design approach to heavy-atom-  
2028 free photosensitizers for enhanced photodynamic therapy under hypoxia. *J Am*  
2029 *Chem Soc* **141**, 16243-16248 (2019).
- 2030 90. Jung HS, *et al.* Overcoming the limits of hypoxia in photodynamic therapy: A  
2031 carbonic anhydrase ix-targeted approach. *J Am Chem Soc* **139**, 7595-7602  
2032 (2017).
- 2033 91. Liu Y, *et al.* Hypoxia induced by upconversion-based photodynamic therapy:  
2034 Towards highly effective synergistic bioreductive therapy in tumors. *Angew*  
2035 *Chem Int Ed Engl* **54**, 8105-8109 (2015).
- 2036 92. Zhang K, *et al.* Light-triggered theranostic liposomes for tumor diagnosis and  
2037 combined photodynamic and hypoxia-activated prodrug therapy. *Biomaterials*  
2038 **185**, 301-309 (2018).



- 2039 93. Luan X, *et al.* A tumor vascular-targeted interlocking trimodal nanosystem  
2040 that induces and exploits hypoxia. *Adv Sci (Weinh)* **5**, 1800034 (2018).
- 2041 94. Long GV, *et al.* Epcadostat plus pembrolizumab versus placebo plus  
2042 pembrolizumab in patients with unresectable or metastatic melanoma (echo-  
2043 301/keynote-252): A phase 3, randomised, double-blind study. *The Lancet*  
2044 *Oncology* **20**, 1083-1097 (2019).
- 2045 95. Cheng Q, *et al.* Selective organ targeting (sort) nanoparticles for tissue-  
2046 specific mrna delivery and crispr-cas gene editing. *Nat Nanotechnol* **15**, 313-  
2047 320 (2020).
- 2048 96. Jinek M, *et al.* A programmable dual-rna-guided DNA endonuclease in  
2049 adaptive bacterial immunity. *Science* **337**, 816-821 (2012).
- 2050 97. Wiedenheft B, *et al.* Rna-guided genetic silencing systems in bacteria and  
2051 archaea. *Nature* **482**, 331-338 (2012).
- 2052 98. Lyu Y, *et al.* A photolabile semiconducting polymer nanotransducer for near-  
2053 infrared regulation of crispr/cas9 gene editing. *Angew Chem Int Ed Engl* **58**,  
2054 18197-18201 (2019).
- 2055 99. Wolter JM, *et al.* Cas9 gene therapy for angelman syndrome traps ube3a-ats  
2056 long non-coding rna. *Nature* **587**, 281-284 (2020).
- 2057 100. Yan L, *et al.* Coupling of n7-methyltransferase and 3'-5' exoribonuclease with  
2058 sars-cov-2 polymerase reveals mechanisms for capping and proofreading. *Cell*  
2059 **184**, 3474-3485 e3411 (2021).
- 2060 101. Jin X, *et al.* In vivo perturb-seq reveals neuronal and glial abnormalities  
2061 associated with autism risk genes. *Science* **370**, (2020).
- 2062 102. Frangoul H, *et al.* Crispr-cas9 gene editing for sickle cell disease and beta-  
2063 thalassemia. *N Engl J Med* **384**, 252-260 (2021).
- 2064 103. Qi J, *et al.* Synergistic effect of tumor chemo-immunotherapy induced by  
2065 leukocyte-hitchhiking thermal-sensitive micelles. *Nat Commun* **12**, 4755  
2066 (2021).

- 2067 104. Qi J, *et al.* Ph and thermal dual-sensitive nanoparticle-mediated synergistic  
2068 antitumor effect of immunotherapy and microwave thermotherapy. *Nano Lett*  
2069 **19**, 4949-4959 (2019).
- 2070 105. Yang W, *et al.* Smart nanovesicle-mediated immunogenic cell death through  
2071 tumor microenvironment modulation for effective photodynamic  
2072 immunotherapy. *ACS Nano* **14**, 620-631 (2020).
- 2073 106. Li Y, *et al.* Hsp70 decreases receptor-dependent phosphorylation of smad2  
2074 and blocks tgf-beta-induced epithelial-mesenchymal transition. *J Genet*  
2075 *Genomics* **38**, 111-116 (2011).
- 2076 107. Lahaye X, *et al.* Hsp70 protein positively regulates rabies virus infection. *J*  
2077 *Virol* **86**, 4743-4751 (2012).
- 2078 108. Dokladny K, *et al.* Regulatory coordination between two major intracellular  
2079 homeostatic systems: Heat shock response and autophagy. *J Biol Chem* **288**,  
2080 14959-14972 (2013).
- 2081 109. Kalmar B, *et al.* Induction of heat shock proteins for protection against  
2082 oxidative stress. *Advanced Drug Delivery Reviews* **61**, 310-318 (2009).
- 2083 110. Niforou K, *et al.* Molecular chaperones and proteostasis regulation during  
2084 redox imbalance. *Redox Biol* **2**, 323-332 (2014).
- 2085 111. Wang C, *et al.* Coordination polymer-coated caco3 reinforces radiotherapy by  
2086 reprogramming the immunosuppressive metabolic microenvironment. *Adv*  
2087 *Mater* **34**, e2106520 (2022).
- 2088 112. Madamanchi NR, *et al.* Reactive oxygen species regulate heat-shock protein  
2089 70 via the jak/stat pathway. *Arterioscler Thromb Vasc Biol* **21**, 321-326 (2001).
- 2090 113. Chen Y, *et al.* Spatiotemporal control of engineered bacteria to express  
2091 interferon-gamma by focused ultrasound for tumor immunotherapy. *Nat*  
2092 *Commun* **13**, 4468 (2022).
- 2093 114. Liu J, *et al.* Co-delivery of iox1 and doxorubicin for antibody-independent  
2094 cancer chemo-immunotherapy. *Nat Commun* **12**, 2425 (2021).

- 2095 115. Mao C, *et al.* Delivery of an ectonucleotidase inhibitor with ros-responsive  
2096 nanoparticles overcomes adenosine-mediated cancer immunosuppression. *Sci*  
2097 *Transl Med* **14**, eabh1261 (2022).
- 2098 116. Jin F, *et al.* Nir-triggered sequentially responsive nanocarriers amplified  
2099 cascade synergistic effect of chemo-photodynamic therapy with inspired  
2100 antitumor immunity. *ACS Appl Mater Interfaces* **12**, 32372-32387 (2020).
- 2101 117. Chen L, *et al.* Tumor-targeted drug and cpg delivery system for phototherapy  
2102 and docetaxel-enhanced immunotherapy with polarization toward m1-type  
2103 macrophages on triple negative breast cancers. *Adv Mater* **31**, e1904997  
2104 (2019).
- 2105 118. Liu Y, *et al.* An inhalable nanoparticulate sting agonist synergizes with  
2106 radiotherapy to confer long-term control of lung metastases. *Nat Commun* **10**,  
2107 5108 (2019).
- 2108 119. Zhang Y, *et al.* Reactive oxygen species-responsive and raman-traceable  
2109 hydrogel combining photodynamic and immune therapy for postsurgical  
2110 cancer treatment. *Nat Commun* **13**, 4553 (2022).
- 2111 120. Huang Y, *et al.* Engineered macrophages as near-infrared light activated drug  
2112 vectors for chemo-photodynamic therapy of primary and bone metastatic  
2113 breast cancer. *Nat Commun* **12**, 4310 (2021).
- 2114

## REVIEWER COMMENTS

Reviewer #1 (Remarks to the Author):

The manuscript is thoroughly revised by including supplementary data, additional justifications, and sentences with more clarity. There remains, however, some questions that needs to be addressed prior to publication. With appropriate revisions in the manuscripts on these aspects, we feel that the manuscript may be ready for publication.

The author claims “superior tumor targeting” of the bacteria based on the increase in bacteria CFU in tumor over time. This needs to be carefully stated since we believe that the majority of this increase is due to bacterial replication and not specifically “targeting”. In this case, the conjugated MHS won’t accumulate in the tumor as much as expected. This needs to be clarified in the manuscript to avoid overstatement.

Figure 6 (i) only has n=2 for LGG-MHI group but n=4 for LGG-MHS group. Why is that? We suggest matching the sample size if possible. N=2 is difficult to assess the data. It could be worthwhile considering moving the data to supplementary.

Thank you to the authors for describing the MHS system. The mechanisms in which MHS gets detached from the conjugated bacteria and enters cancer cells are still unclear though. It would be helpful for the readers to clarify this point.

The author claims that the efficacy against metastasis were due to systemic immune activation. Have they checked whether the bacteria colonize metastasized tumors? This is a critical control experiment to support the claim.

The bacterial CFU difference in tumor and liver seems very small compared to other studies of bacterial cancer therapy (~1000 fold difference). We suggest the authors toning down the claim of tumor targeting by LGG, and clearly point out this difference in the manuscript.

Reviewer #2 (Remarks to the Author):

The authors have made extensive revisions and included new data that address all my previous concerns.

Reviewer #4 (Remarks to the Author):

I think this work with revisions is now acceptable for publication

Reviewer #5 (Remarks to the Author):

The manuscript reported by Yu et al. presents a self-driven CRISPR/Cas9 nanosystem for TIME modulation to avoid lung metastasis and antagonize re-challenge. The nanosystem uses LGG for hypoxia targeting and ZIF-8 for sonosensitizer hematoporphyrin monomethyl ether and CRISPR/Cas9 delivery. A lot of experiments have been done and largely support that the combination of these technology shows its powerful for in vivo tumor immunosuppressive. Although the combination of these technologies is novel and the authors emphasize their specific originality from microbial CRISPR/Cas9 nanosystem and ultrasound-based dual modulation, they do not provide a clear conclusion about how the nanosystem form and how its individual component interact. This results in the unexplained dominance of each component. To better understand the system, the following comments need to be addressed. The knockout of IDO may suppress tumors, but it may also affect other functions since IDO is a functional gene. Therefore, we suggest the author can try other

CRISPR systems, such as CRISPR/Cas13 for gene knockdown in RNA level in future studies.

1. The authors have a tedious explanation on how to encapsulate biomacromolecules by MOFs and give the conclusion as “Cas9/sgRNA is partially internalized into the interior of MH and partially grafted onto the surface of MH after incubation with MH, resulting in MHS.” But there is no positive response as to what kinds of interactions responsible for the internalization and graft.
2. It is not accurate to use average pore size to explain the Cas/sgRNA penetration. Firstly, the reviewer has serious doubts about the reliability of N2 adsorption-desorption isotherms in Fig. 2b and supplementary Fig. 2c, since ZIF-8 does not have such large pore size. Secondly, the decrease of pore size is too less to demonstrate cargoes loaded into their pores, even for small molecules, not to mention Cas9/sgRNA.
3. In fact, the morphology of ZIF-8 is greatly influenced by the encapsulated biomolecules. But the hexagonal structure change is no guaranteed. The authors should give the PXRD results to show the crystal structure consistency.
4. Except P element, it seems like other elements also have increased in the EM figures of MHS. A relative percentage of each element is required for ZIF-8, MH and MHS. Please keep the scale bars of LGG-MHS in Fig. 2h consistently, not coexist of 0.5 and 1  $\mu\text{m}$ .
5. It is still confused that the grayscale of naked sgRNA in supplementary Fig. 2b was used to calculate the loading efficiency since the RNP was added. Sametime, no electrophoresis result of naked sgRNA, even RNP has been shown in supplementary Fig. 2a.
6. The deep sequencing analysis is needed in Fig 3j to avoid that the point mutation is mismatch introduced during PCR process.
7. As an important reference, the authors need to add IDO to Fig. 4 and give the corresponding discussion.
8. Please add controls to RNAseq-based KEGG analysis in Fig. 5 to explain if the gene expression profiles are conducted by LGG-MHS+US treatment only.

## Response to reviewer #1

*The manuscript is thoroughly revised by including supplementary data, additional justifications, and sentences with more clarity. There remains, however, some questions that needs to be addressed prior to publication. With appropriate revisions in the manuscripts on these aspects, we feel that the manuscript may be ready for publication.*

**Response:** Thank you very much for the positive comments and recommendations. Your concerns have been addressed point by point, and the corresponding content has been added and modified in the Revised Manuscript. Please find the following detailed responses to your comments and suggestions.

*1.The author claims “superior tumor targeting” of the bacteria based on the increase in bacteria CFU in tumor over time. This needs to be carefully stated since we believe that the majority of this increase is due to bacterial replication and not specifically “targeting”. In this case, the conjugated MHS won’t accumulate in the tumor as much as expected. This needs to be clarified in the manuscript to avoid overstatement.*

**Response:** Thank you for your constructive suggestions, which will help to improve the rigor of our research. The inappropriate description has been corrected in the Revised Manuscript, which reads, “The amount of LGG was increased dramatically over time in tumors within 24 h after injection. Interestingly, LGG enrichment in the tumor was higher than in the liver at 72 h with ~ 2-fold difference in CFU, which was attributed to the more favourable hypoxic microenvironment in the tumor for LGG proliferation, which further supports that LGG has relatively better hypoxic targeting and proliferative capacity (Supplementary Fig. 6a, b).” (Line 296-301, Page 9-10, Revised Manuscript)

*2.Figure 6 (i) only has n=2 for LGG-MHI group but n=4 for LGG-MHS group. Why is*

that? We suggest matching the sample size if possible.  $N=2$  is difficult to assess the data. It could be worthwhile considering moving the data to supplementary.

**Response:** Thank you for your constructive comments. Regarding the mismatch between the two groups of mice in Figure 6i, which is due to construction of the re-challenge model according to the suggestion of 2# reviewers, *i.e.* re-injection of 4T1 cells into surviving mice ( $n_{\text{LGG-MHI+US}} = 2$ ,  $n_{\text{LGG-MHS+US}} = 4$ ) after primary tumor treatment to assess whether the treatment stimulates durable and stable anti-tumor immunity. Since the number of surviving mice is an experimental result after primary tumor treatment rather than by manual control, it leads to mismatch in the number of mice between the two groups. Following your suggestion, the relevant data has been moved to the Supplementary Information. (**Supplementary Figure 9i, Page 17, Revised Supplementary Information**).

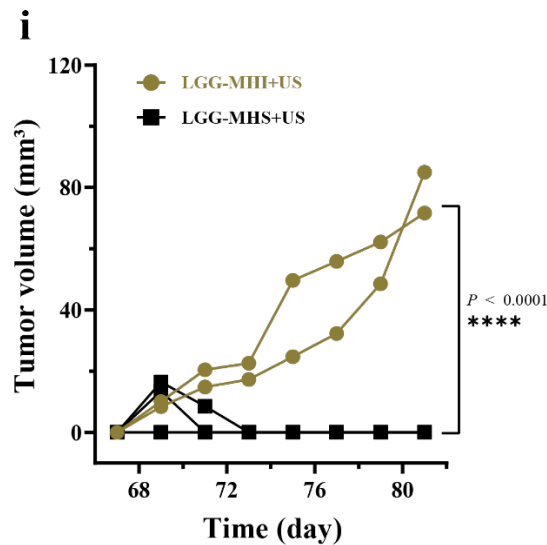

**Supplementary Figure 9. (i)** Average tumor growth curves after being treated by re-challenge. ( $n_{\text{LGG-MHI+US}} = 2$ ,  $n_{\text{LGG-MHS+US}} = 4$ )

3. Thank you to the authors for describing the MHS system. The mechanisms in which MHS gets detached from the conjugated bacteria and enters cancer cells are still unclear though. It would be helpful for the readers to clarify this point.



**Response:** Thank you for your constructive suggestions. The description of the mechanism of the separation of MHS from LGG was added to the article as follows, “Notably, it has been shown that the acidic nature of the tumor microenvironment reduces the forces between the drug molecule and the carrier material, such as electrostatic interaction, which facilitate the release of the drug. Therefore, when LGG-MHS is enriched in the tumor hypoxic microenvironment, the decrease in pH value improves the release of MHS from LGG.” (Line 113-116, Page 4, Revised Manuscript)

In addition, confocal was used to observe the mechanism of MHS entry into cells as detailed below, “4T1 cells were seeded into CLSM-specific culture dishes at a density of  $1 \times 10^5$  and incubated for 24 h at 37 °C, followed by pre-treatments of M $\beta$ CD, sucrose, and amiloride for 30 min, following the medium was replaced by Cy3-labeled MHS (MHS = 100  $\mu$ g/mL), which was then co- incubated for 3h. Then, the medium was washed with PBS for 3 times, followed by cell nucleus was stained by DAPI for 20 min. To further observe the intracellular fluorescence intensity, and the fluorescence signals were measured.”(Line 62-68, Page 3, Revised Supplementary Information) Corresponding descriptions were added to the Revised Manuscript, which reads, “In order to thoroughly investigate the cellular absorption mechanism and confirm clathrin-mediated endocytosis, caveolae-mediated endocytosis, and micro-pinocytosis, three endocytosis inhibitors—sucrose, methyl-cyclodextrin (M $\beta$ CD), and amiloride—were applied, respectively. The CLSM images show that endocytosis efficiency was decreased in cells pretreated with M $\beta$ CD and amiloride, indicating that caveolae-dependent endocytosis were the primary routes for the endocytic uptake of MHS (Supplementary Fig. 3a, b).” (Line 191-196, Page 6, Revised Manuscript)

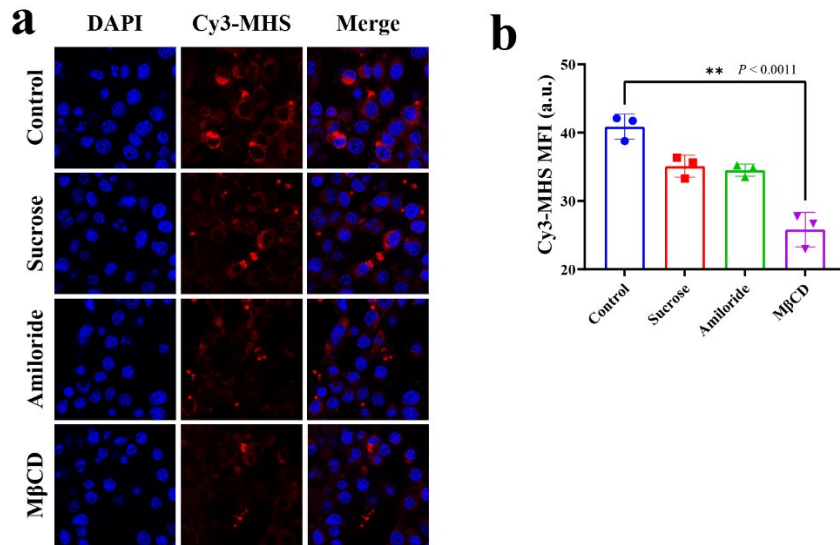

**Supplementary Figure 3.** (a) CLSM images and (b) the corresponding mean fluorescence intensity analysis of cellular uptake of Cy3-labeled MHS by 4T1 cancer-cell line after coincubation with different inhibitors.

4. The author claims that the efficacy against metastasis were due to systemic immune activation. Have they checked whether the bacteria colonize metastasized tumors? This is a critical control experiment to support the claim.

**Response:** Thank you for your constructive suggestions. We have replicated the distal tumor model in order to investigate whether bacteria colonize distal tumors and thus can contribute to the immune activation effect, and have added a corresponding description to the Revised Manuscript, which reads, “It is crucial to ensure that LGG can colonize distal tumors before the LGG-MHS self-driven nanosystem elicits systemic immune effects. Therefore, 4T1 cells were injected into the left side of the second breast pad of mice and the same operation was performed on the right side 7 days later to establish an *in situ* dual tumor model as primary and distal tumors, respectively. When the primary tumor size reached approximately 200-250 mm<sup>3</sup> and the distal tumor volume was approximately 60-80 mm<sup>3</sup>, LGG was injected *via* tail vein. After 24 hours, the primary and distal tumors were harvested and homogenized for dish coating. As shown in Supplementary Figure 12a and 12b, both primary and distal tumors showed LGG colonization. The difference in CFU may be due to the different

levels of hypoxia in the primary and distal TIME.” (Line 464-472, Page 15, Revised Manuscript)

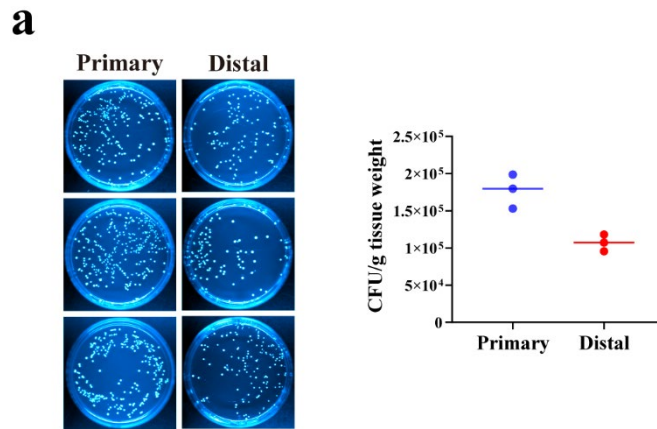

**Supplementary Figure 12a.** (a) Representative photographs and corresponding CFU count analysis of MRS agar plates of bacterial colonization in primary and distal tumor. ( $n = 3$ ),

*5. The bacterial CFU difference in tumor and liver seems very small compared to other studies of bacterial cancer therapy (~1000 fold difference). We suggest the authors toning down the claim of tumor targeting by LGG, and clearly point out this difference in the manuscript.*

**Response:** Thank you for your careful review and constructive suggestions, which are critical to improving the rigor of our research. To down the claim of tumor targeting by LGG, there are some improperly descriptions that were modified in the Revised Manuscript, which reads, “revealing that the LGG-MHS complex has relatively better tumor targeting properties.” (Line 343-344, Page 11, Revised Manuscript) “demonstrating relatively good tumor targeting properties of LGG-MHS” (Line 351-352, Page 11, Revised Manuscript) “After our study, we found that LGG does have an ability to target the hypoxic microenvironment of tumors.” (Line 533-534, Page 17, Revised Manuscript) “revealing relatively better tumor targeting properties of the LGG-MHS complex.” (Line 536-537, Page 17, Revised Manuscript)

In addition, the minor differences in bacterial CFU between tumor and liver were present in the Revise Manuscript, which reads, “The amount of LGG was increased

dramatically over time in tumors within 24 h after injection. Interestingly, LGG enrichment in the tumor was higher than in the liver at 72 h with ~ 2-fold difference in CFU, which was attributed to the more favourable hypoxic microenvironment in the tumor for LGG proliferation, which further supports that LGG has relatively better hypoxic targeting and proliferative capacity (Supplementary Fig. 6a, b).” (Line 296-301, Page 9-10, Revised Manuscript)

## **Response to reviewer #2**

*The authors have made extensive revisions and included new data that address all my previous concerns*

**Response:** It is an honor to receive your approval of this work, and we appreciate your constructive comments to help improve the quality of the research.

## **Response to reviewer #4**

*I think this work with revisions is now acceptable for publication*

**Response:** Thank you for your constructive comments that have greatly benefited the rigor of our study. We also appreciate your affirmation of this study.

## **Response to reviewer #5**

*The manuscript reported by Yu et al. presents a self-driven CRISPR/Cas9 nanosystem for TIME modulation to avoid lung metastasis and antagonize re-challenge. The nanosystem uses LGG for hypoxia targeting and ZIF-8 for sonosensitizer hematoporphyrin monomethyl ether and CRISPR/Cas9 delivery. A lot of experiments have been done and largely support that the combination of these technology shows its powerful for in vivo tumor immunosuppressive. Although the combination of these technologies is novel and the authors emphasize their specific originality from microbial CRISPR/Cas9 nanosystem and ultrasound-based dual modulation, they do*

*not provide a clear conclusion about how the nanosystem form and how its individual component interact. This results in the unexplained dominance of each component. To better understand the system, the following comments need to be addressed. The knockout of IDO may suppress tumors, but it may also affect other functions since IDO is a functional gene. Therefore, we suggest the author can try other CRISPR systems, such as CRISPR/Cas13 for gene knockdown in RNA level in future studies.*

**Response:** Thank you for your kind comments and constructive suggestions. A conclusive description of how the LGG-MHS self-driven nanosystem was formed has been added to the Revised Manuscript as follows, “Briefly, during the synthesis of ZIF-8, HMME was added dropwise to form MH through *in situ* encapsulation, and MH was incubated with CRISPR/Cas9 to produce MHS *via* the inherent dispersion force of ZIF-8 coupled with surface energy between substances adsorption of CRISPR/Cas9, and grafting of CRISPR/Cas9 by imidazole-like ligands provided by ZIF-8. Finally, MHS was electrostatically adsorbed onto the surface of LGG after being magnetically agitated with it in PBS at room temperature.” (Line 105-110, Page 4, Revised Manuscript) The relevant experimental methods are represented in the Revised Manuscript, which reads, “2-Methylimidazole (1.910 g) and zinc nitrate solution (1.314 g) were dissolved in methanol (20 mL), respectively. Hematoporphyrin monomethyl ether (HMME, 200  $\mu$ L, 2 mg/mL) was slowly added to 2-methylimidazole solution under mechanical stirring at room temperature, and after 10 min, zinc nitrate solution was added dropwise. The MH was obtained after stirring for 24 h at room temperature. Then, the MH and CRISPR/Cas9 system (mass ratio 4:1) were incubated at 37 ° C according to the methodology instructions, finally, the integration of MHS nanosystem was constructed. The obtained product was gathered by centrifugation and washed with ddH<sub>2</sub>O for three times to remove the residuum. MHS was further stirred with LGG (PBS = 1 mL, LGG =  $1 \times 10^7$  CFU, MHS = 1 mg) in PBS for 24 h to arrangement LGG-MHS.” (Line 595-603, Page 19, Revised Manuscript) Additionally, a clear conclusion about how the components of the nanosystem interact was modified in the Revised Manuscript, which reads, “Utilizing the hypoxia targeting ability of LGG, the

ultrasound (US)-controlled CRISPR/Cas9 gene editing system (MHS) was delivered to the hypoxia tumor core, thus promoting effective accumulation of MHS in tumors. Notably, it has been shown that the acidic nature of the tumor microenvironment reduces the forces between the drug molecule and the carrier material, such as electrostatic interaction, which facilitate the release of the drug. Therefore, when LGG-MHS is enriched in the tumor hypoxic microenvironment, the decrease in pH value improves the release of MHS from LGG. The as-obtained CRISPR/Cas9 system generated reactive oxygen species (ROS) upon US triggering, which induced the release of tumor-associated antigens, immunogenic cell death of tumor cells and caused DCs maturation. In addition, ROS effectively disrupted the structure of the endosomal/lysosomal membrane, allowing Cas9/sgRNA to escape from the endosomal/lysosomal and transport to the nucleus for efficient *IDO1* knockdown, reducing Treg cells to cluster in the tumor microenvironment.” (Line 110-122, Page 4, Revised Manuscript)

We are grateful for your valuable suggestions regarding gene editing tools, and we will actively adopt your suggested research ideas in our future studies, which we believe will greatly benefit the quality and content of our future studies.

*1. The authors have a tedious explanation on how to encapsulate biomacromolecules by MOFs and give the conclusion as “Cas9/sgRNA is partially internalized into the interior of MH and partially grafted onto the surface of MH after incubation with MH, resulting in MHS.” But there is no positive response as to what kinds of interactions responsible for the internalization and graft.*

**Response:** Thank you for your kind comments and constructive suggestions. Many relevant studies have shown that MOFs automatically adsorb substances into the pores when immersed in sufficient concentration *via* the inherent dispersion force of MOFs and surface energy between substances<sup>1-4</sup>. This process certainly requires the pore size and volume of the MOFs to be larger than the substance being adsorbed. Relevant BET data show that the average pore size of MH (ZIF-8 after in situ encapsulation of HMME)

is 3.3482 nm, which is sufficient for internalization of CRISPR/Cas9. In addition, the total pore volume of MHS was also reduced relative to MH, which demonstrated the successful internalization of CRISPR/Cas9.

Related studies have shown that hydrogen bonding interactions may occur between the free carboxyl, amino or imidazole MOF ligands of MOFs and biomolecules, which would lead to CRISPR/Cas9 coupling to the surface of ZIF-8<sup>5</sup>. A study in which simulated drug entry into ZIF-8 found that the Zn<sup>2+</sup> cations in the ZIF-8 structure exhibit tetrahedral geometry coordinated by four neighboring imidazolate groups. It is expected that the Zn<sup>2+</sup> cations on the surface of the ZIF-8 structure will have two imidazolate ligands replaced by water molecules. And the relevant molecular docking results show that doxorubicin binds to the Zn<sup>2+</sup> cation, thus maintaining its tetrahedral coordination geometry, possibly by replacing two water molecules acting as ligands to the cation<sup>6</sup>. Thus ZIF-8 provides imidazole-based ligands capable of forming hydrogen bonds with biomolecules, making CRISPR/Cas9 grafting a reality.

And lastly, the elaboration on the interaction of internalization and grafting was mentioned in the Revised Manuscript, which reads, “Briefly, during the synthesis of ZIF-8, HMME was added dropwise to form MH through *in situ* encapsulation, and MH was incubated with CRISPR/Cas9 to produce MHS *via* the inherent dispersion force of ZIF-8 coupled with surface energy between substances adsorption of CRISPR/Cas9, and grafting of CRISPR/Cas9 by imidazole-like ligands provided by ZIF-8.” (Line 105-110, Page 4, Revised Manuscript)

*2. It is not accurate to use average pore size to explain the Cas/sgRNA penetration. Firstly, the reviewer has serious doubts about the reliability of N<sub>2</sub> adsorption-desorption isotherms in Fig. 2b and supplementary Fig. 2c, since ZIF-8 does not have such large pore size. Secondly, the decrease of pore size is too less to demonstrate cargoes loaded into their pores, even for small molecules, not to mention Cas9/sgRNA.*



**Response:** Thank you for your careful review and constructive suggestions. It was shown that not only micropores smaller than 2 nm and mesopores of 2-50 nm exist in ZIF-8, but also interparticle mesoporosity and macroporosity between ZIF-8 particles<sup>7</sup>. We apologize for inappropriately using the average pore size encompassing all pore sizes and interparticle mesoporosity and macroporosity between ZIF-8 particles that under 100 nm to account for Cas9/sgRNA penetration. Therefore, we removed the reference to aperture explaining CRISPR/Cas9 penetration. In addition, the NLDFT model was used to re-detect the pore size of MH and MHS, and the relevant data are presented in the inserted data in Figure 2b and Supplementary Figure 2c. A related research showed that when the MOF material was encapsulated in situ after the substance, the presence of mesopores with a radius of  $3.5 \pm 0.5$  nm within the MOF was detected, significantly larger than the theoretical pore size of the pure phase ZIF-8, such that the mesopores have sufficient size to accommodate biomolecules<sup>8</sup>. Therefore, MH was performed BET test and the relevant data showed that after in situ encapsulation of HMME, mesopores with an average pore size of 3.3482 nm were detected in MH, and their size was sufficient for the penetration of Cas/sgRNA.

In addition, pore volume was used to explain Cas9/sgRNA penetration. Relevant data showed that the total pore volume of MHS calculated by single-point method was  $0.045091\text{cm}^3/\text{g}$  when the relative pressure of adsorption curve was 0.988643472 after MH incubation with Cas9/sgRNA, although it did not show a significant decrease compared with the total pore volume of MH ( $0.724167\text{cm}^3/\text{g}$ ). However, it is further verified that part of Cas9/sgRNA penetrates into MH. The corresponding description is added to the revision, which reads “Moreover, the pore volume of MHS also showed a decrease relative to MH, demonstrating that part of the Cas9/sgRNA successfully entered the interior of ZIF-8 *via* permeation.” (Line 142-144, Page 5, Revised Manuscript)

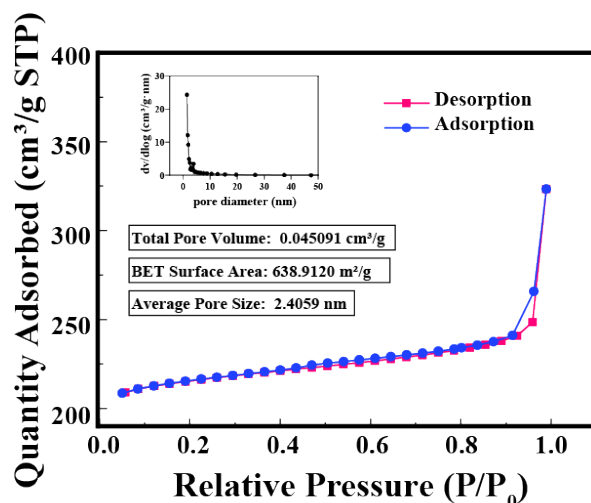

**Fig. 2. (b)**  $N_2$  adsorption-desorption isotherms and of MHS. The inset shows its corresponding BET total pore volume specific surface area and average pore size.

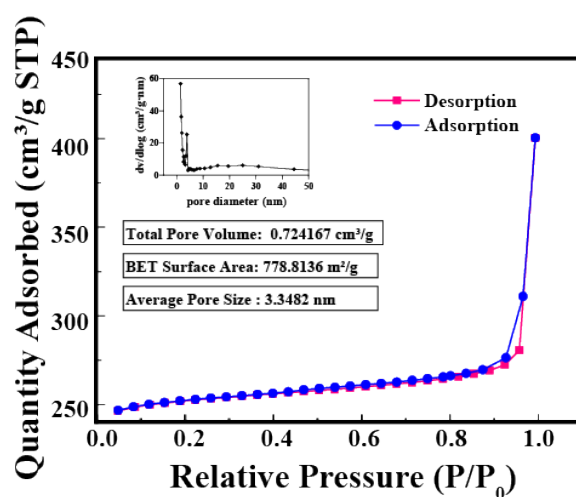

**Supplementary Figure 2. (c)**  $N_2$  adsorption-desorption isotherms and of MH. The inset shows its corresponding BET total pore volume specific surface area and average pore size.

3. *In fact, the morphology of ZIF-8 is greatly influenced by the encapsulated biomolecules. But the hexagonal structure change is no guaranteed. The authors should give the PXRD results to show the crystal structure consistency.*

**Response:** Thank you for your constructive comments and for this reason we have performed PXRD tests on ZIF-8, MH and MHS separately. The results are shown in Figure 2e in the Revised Manuscript. The peaks of ZIF-8, MH and MHS in PXRD plots do not show great differences. The corresponding descriptions were also added to the

Revised Manuscript, which reads, “Following that, transmission electron microscopy (TEM) and Powder X-ray diffraction (PXRD) were used to examine the morphologies and structures of ZIF-8, MH and MHS, which showed no changes in nanoparticles morphology except for the slightly increase in particle size of MH and MHS compared to ZIF-8.” (Line 144-148, Page 5, Revised Manuscript)

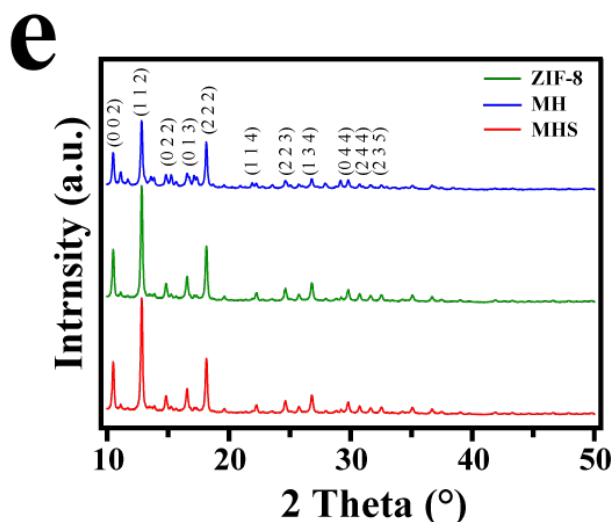

**Fig. 2.** (e) PXRD of ZIF-8, MH and MHS.

4. Except P element, it seems like other elements also have increased in the EM figures of MHS. A relative percentage of each element is required for ZIF-8, MH and MHS. Please keep the scale bars of LGG-MHS in Fig. 2h consistently, not coexist of 0.5 and 1  $\mu\text{m}$ .

**Response:** Thank you for your careful review. The relative percentages of each element are provided in the following table (Supplementary Table 1, Page 23, Revised Supplementary Information). As the data presented in the supplementary table, although the proportion of all elements except C shows an increase, the increase of P element is much greater than that of Zn element and N element.

Additionally, the scale bars in Figure 2h of the previous revision manuscript were adjusted to be consistent (Figure 2i, Page 30, Revised Manuscript).

**Supplementary Table 1:** Corresponding atomic fraction of Fig. 2d.

|       | Zn (%) | P (%) | N (%) | C (%) |
|-------|--------|-------|-------|-------|
| ZIF-8 | 1.09   | 0.01  | 3.89  | 95.01 |
| MH    | 0.95   | 0.01  | 2.67  | 96.37 |
| MHS   | 3.88   | 0.56  | 4.95  | 90.61 |

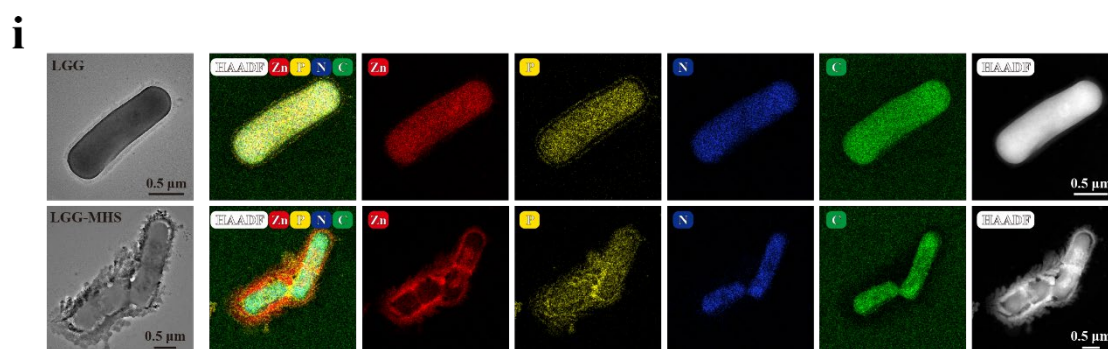

**Fig. 2.** (i) Transmission electron microscopic (TEM) and corresponding elemental mappings of LGG and LGG-MHS.

5. It is still confused that the grayscale of naked sgRNA in supplementary Fig. 2b was used to calculate the loading efficiency since the RNP was added. Sametime, no electrophoresis result of naked sgRNA, even RNP has been shown in supplementary Fig. 2a.

**Response:** We apologize for the misspelling of the vertical coordinate labels in Figure 2b. The corresponding error has been corrected in Supplementary Figure 2b in the Revised Supplementary Information. In our experiments, the MH group did not contain Cas9/sgRNA (RNP), and the Cas9/sgRNA mass in the other groups was fixed and the variable was MH, so when MH: Cas9/sgRNA was 0, it meant that only Cas9/sgRNA was present at this time. Figure 2b shows that bare Cas9/sgRNA (*i.e.*, the 0 group in Supplementary Figure 2a) was used as a reference to calculate the grayscale values of undegraded sgRNA after incubation of different ratios of MH:Cas9/sgRNA in 10% serum for 6 h to explore the optimal ratio of MH to protect Cas9/sgRNA from degradation. Regarding the synthesis of Cas9/sgRNA at a fixed ratio was mentioned in the revised manuscript, which reads, “Then, the MH and CRISPR/Cas9 system (mass

ratio 4:1) were incubated at 37 ° C according to the methodology instructions, finally, the integration of MHS nanosystem was constructed.” (Line 599-601, Page 19, Revised Manuscript)

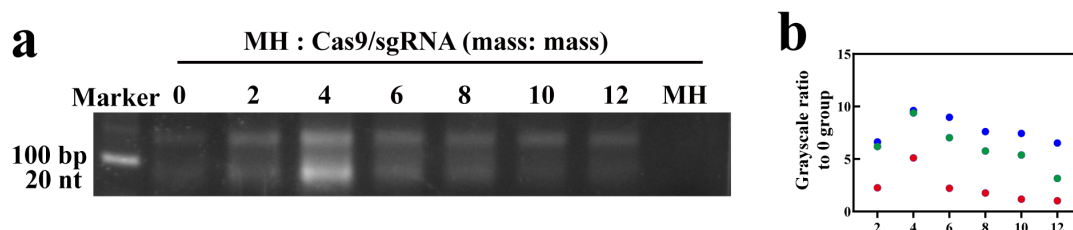

**Supplementary Figure 2.** (a) Agarose gel electrophoresis and (b) corresponding quantitative analysis of MHS nanoparticles at different MH/sgRNA ratios after incubation with serum (10% volume) for 6 h. Group 0 *i.e.* naked Cas9/sgRNA ( $n = 3$ ). \* $P < 0.05$ , \*\* $P < 0.01$ , \*\*\* $P < 0.001$ , \*\*\*\* $P < 0.0001$ .

6. The deep sequencing analysis is needed in Fig 3j to avoid that the point mutation is mismatch introduced during PCR process.

**Response:** Thank you very much for the kind comments and suggestions. The corresponding deep sequencing analysis of Figure 3j have been provided in Supplementary Figure 4 of the Revised Supplementary Information, and the related discussion has been referred in the Revised Manuscript, which reads, “Subsequently, next-generation sequencing (NGS) was further performed to quantify the efficiency of the *IDOI* indel, revealing a genome disruption efficiency was 19.86% and 34.91% for the MHS and MHS + US group, respectively, compared with only 6.35% for the control group (Fig. 3j, k and Supplementary Fig. 4a). Additionally, NGS reveals that the insertion and deletion mutation rates of the *IDOI* motif in the MHS + US group were 1.80% and 16.61%, respectively, while the deletion mutation rate of the *IDOI* motif in the MHS group was 7.79%, which further indicating that US-generated ROS disruption of the lysosomal membrane could significantly improve genome editing efficiency (Supplementary Fig. 4b).” (Line 238-245, Page 8, Revised Manuscript)

| <b>j</b> Gene deep sequencing results      |                         |                                 |
|--------------------------------------------|-------------------------|---------------------------------|
| <i>IDOI</i> 20 bp target site              | CGCCATGGTGATGTACCCCAAGG | Percentage of mutated sequences |
| TTCCACACATACGCCATGGTGATGTA-CCCAAGGCCAGGTGT |                         | 6.74% (-1)                      |
| TTCCACACATACGCCATGGTGATGTGCCCAAGGCCAGGTGT  |                         | 0.14% (A<sup>G</sup>)           |
| TTCCACACATACGCCATGGCGATGTACCCCAAGGCCAGGTGT |                         | 0.14% (T<sup>C</sup>)           |
| TTCCACACATACGCCATGGTGACGTACCCCAAGGCCAGGTGT |                         | 0.13% (T<sup>C</sup>)           |
| TTCCACACATACGCCATGGTGTGTACCCCAAGGCCAGGTGT  |                         | 0.13% (A<sup>G</sup>)           |
| TTCCACACATACGCCATGGTGATGTACCCCGAGGCCAGGTGT |                         | 0.12% (A<sup>G</sup>)           |
| -----                                      |                         |                                 |
| Total                                      |                         | 19.86%                          |

| <b>k</b> Gene deep sequencing results      |                         |                                 |
|--------------------------------------------|-------------------------|---------------------------------|
| <i>IDOI</i> 20 bp target site              | CGCCATGGTGATGTACCCCAAGG | Percentage of mutated sequences |
| TTCCACACATACGCCATGGTGATGTA-CCCAAGGCCAGGTGT |                         | 9.44% (-1)                      |
| TTCCACACATACGCCATGGTGATGTA-CCAGGCCAGGTGT   |                         | 0.94% (-2)                      |
| TTCCACACATACGCCATGGTGATGTACCCAGGCCAGGTGT   |                         | 0.65% (+1)                      |
| TTCCACACATACGCCAT-----GGTGT                |                         | 0.38% (-20)                     |
| TTCCACACATAC-----GCCAGGTGT                 |                         | 0.21% (-21)                     |
| TTCCACACATACGCCATGGTGATGTACCCCAAGGCCAGGTGC |                         | 0.21% (T<sup>C</sup>)           |
| -----                                      |                         |                                 |
| Total                                      |                         | 34.91%                          |

**Fig. 3. (j)** Deep sequencing analysis of gene editing in 4T1 cells in the presence of MHS and **(k)** MHS + US.

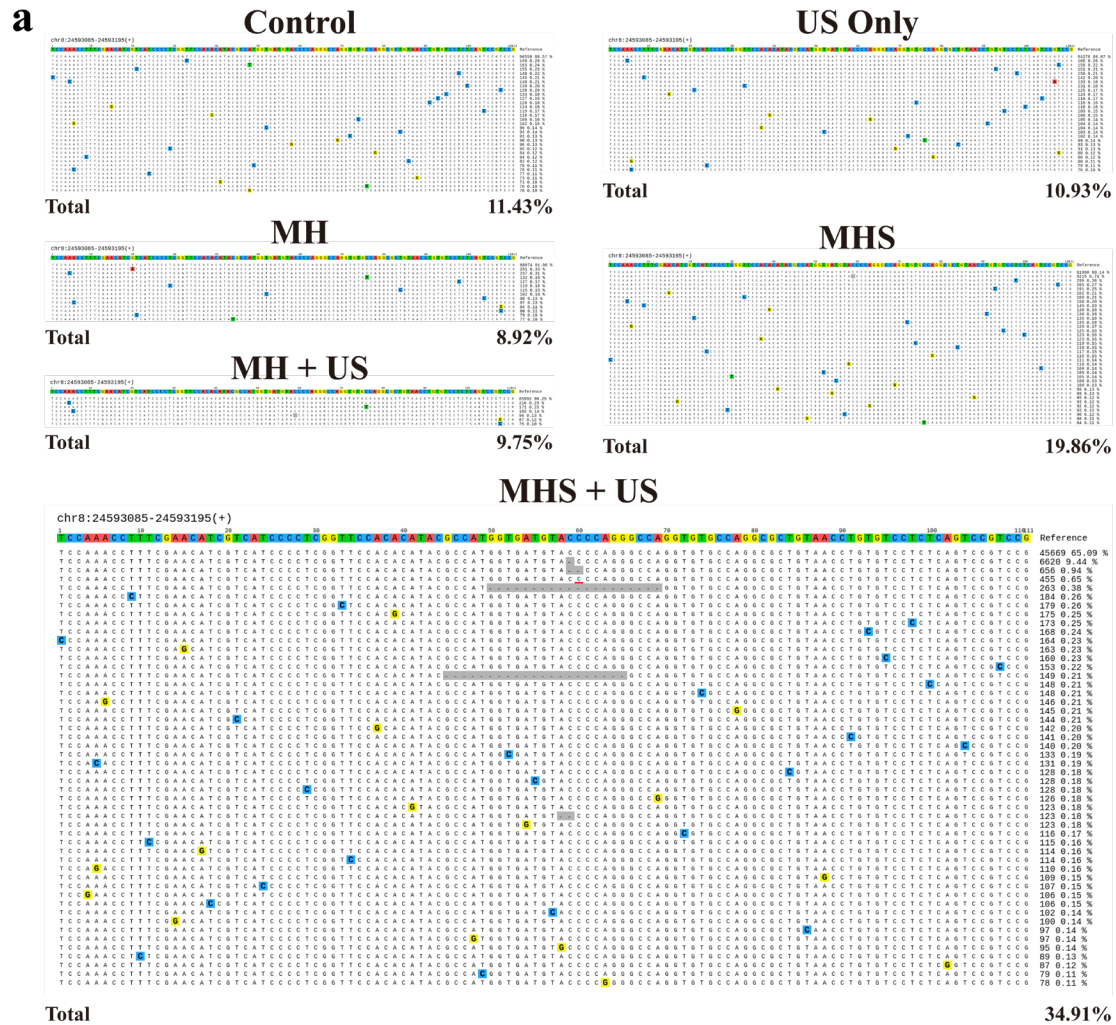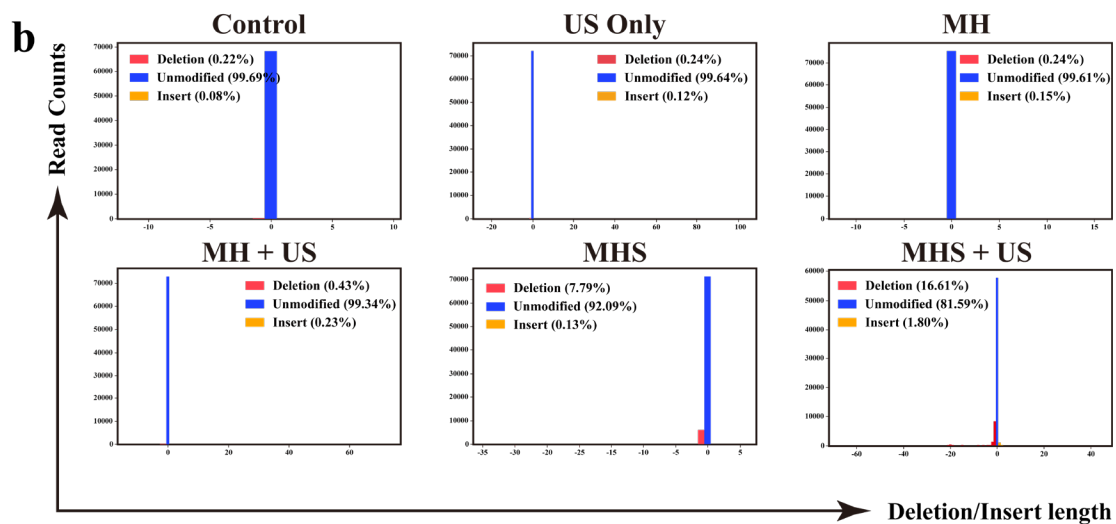

**Supplementary Figure 4.** (a) Deep sequencing for targeted disruption of *IDO1* locus in control, US only, MH, MH + US, MHS and MHS + US. (b) Nucleotide deletion and insert distribution around the cut site of *IDO1* locus in control, US only, MH, MH + US, MHS and MHS + US.



7. As an important reference, the authors need to add *IDO* to Fig. 4 and give the corresponding discussion.

**Response:** Thank you very much for the kind comments and suggestions. *IDO* is indeed an important reference, therefore CLSM and WB were used to validate the effect of the CRISPR/Cas9 nanosystem on *IDO1* knockdown. The results are presented in Figure 3f, 3g of Revised Manuscript and Supplementary Fig. 3g, 3h of Revised Supplementary Information, respectively. Furthermore, the related discussion is also mentioned in the revised manuscript, which reads, “To investigate the gene editing efficacy of the MHS nanosystem under US irradiation, Cas9/sgRNA-mediated *IDO1* degradation was examined in 4T1 cells by employing immunofluorescence staining and Western blotting. As the results reveal that *IDO* protein expression levels were significantly reduced in the MHS and MHS + US group, indicating that Cas9/sgRNA effectively mediated the *IDO1* knockdown (Fig. 3f, g and Supplementary Fig. 3g, h).” (Line 226-230, Page 7, Revised Manuscript)

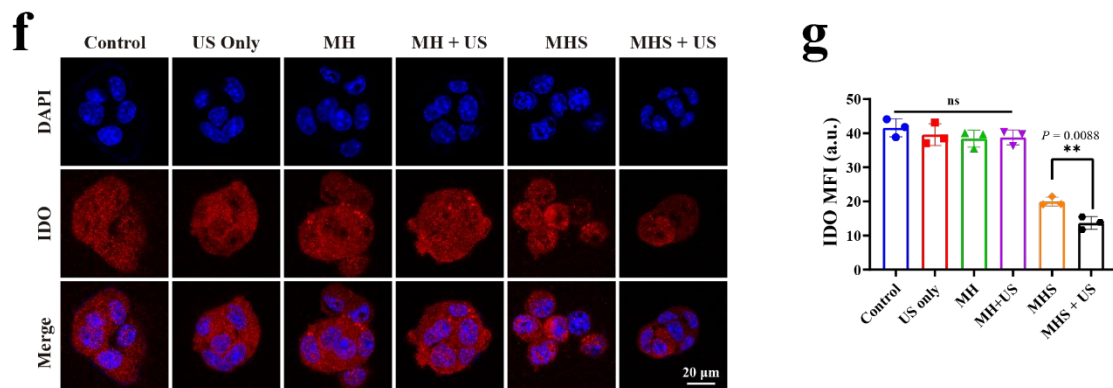

**Fig. 3.** (f) CLSM images and (g) corresponding mean fluorescence intensity of 4T1 cells treated with various treatments after IFN $\gamma$ -stimulation, including control, US only, MH, MH + US, MHS and MHS + US, followed by staining with fluorescent anti-*IDO* antibody (red). DAPI was used to stain the nucleus of the cell (blue) ( $n = 3$ ).

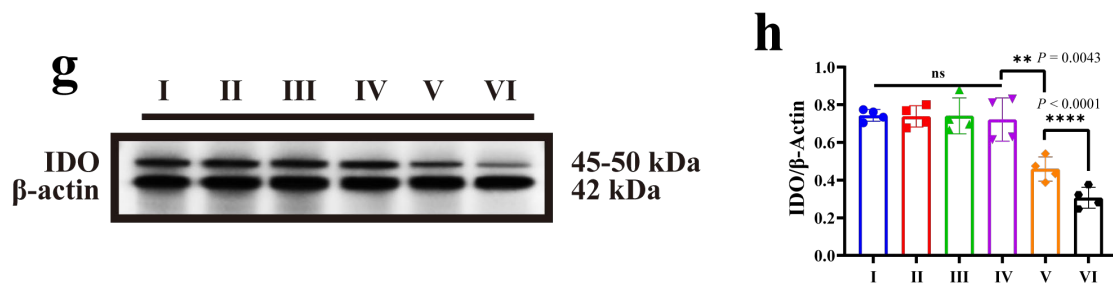

**Supplementary Figure 3.** (g) Western Blot and (h) corresponding quantitative analysis of IFN- $\gamma$ -stimulated 4T1 cells treated with various treatments. (I = control, II = US only, III = MH, IV = MH + US, V = MHS, VI = MHS + US) ( $n = 4$ ). \* $P < 0.05$ , \*\* $P < 0.01$ , \*\*\* $P < 0.001$ , \*\*\*\* $P < 0.0001$ .

8. Please add controls to RNaseq-based KEGG analysis in Fig. 5 to explain if the gene expression profiles are conducted by LGG-MHS+US treatment only.

**Response:** Thank you very much for your kind comments and suggestions. We are very sorry for any misunderstanding you maybe caused due to improper description. The purpose of the RNA sequencing was to explore the role played by LGG in tumor treatment, therefore 4T1 tumor mice models were established and randomly divided into two groups including control and LGG groups ( $1 \times 10^7$  CFU LGG intravenously). Regarding the profile of KEGG analysis in Figure 5, it is the result of a comparative analysis of mice given LGG treatment (LGG group) or mice without any treatment (control group) after RNA sequencing (**Fig 5a-c, Page 36, Revised Manuscript**). The corresponding experimental methods have been described in the Supplementary Information, which reads, “With the approval of the Animal Ethics Committee of Shanghai Tenth People's Hospital, Tongji University School of Medicine, the study was conducted on Balb/c mice ( $n = 6$ ). To establish 4T1 tumor bearing mouse models, Balb/c mice were subcutaneously implanted with 4T1 cells. After the tumor volume reached  $\sim 200 \text{ mm}^3$ , and then they were randomly divided into two groups ( $n = 3$  per group), including the control and LGG groups (intravenous injection of  $1 \times 10^7$  CFU LGG). At 24 h after the injection, tumor tissues were extracted, followed by nucleic acid extraction and full transcriptome sequencing.” (**Line 140-147, Page 6, Revised Supplementary Information**) In addition, a relevant discussion on clarifying that the

results of RNA sequencing only relate to LGG has provided in the Revised Manuscript, which reads, “Subsequently, six 4T1 tumor-bearing mouse models were established, which were randomly divided into LGG groups and control groups. When the tumor volume reached 200 mm<sup>3</sup>, RNA sequencing was performed on the tumors in order to investigate the potential biological mechanisms of LGG to promote therapeutic efficacy.” (Line 302-305, Page 10, Revised Manuscript)

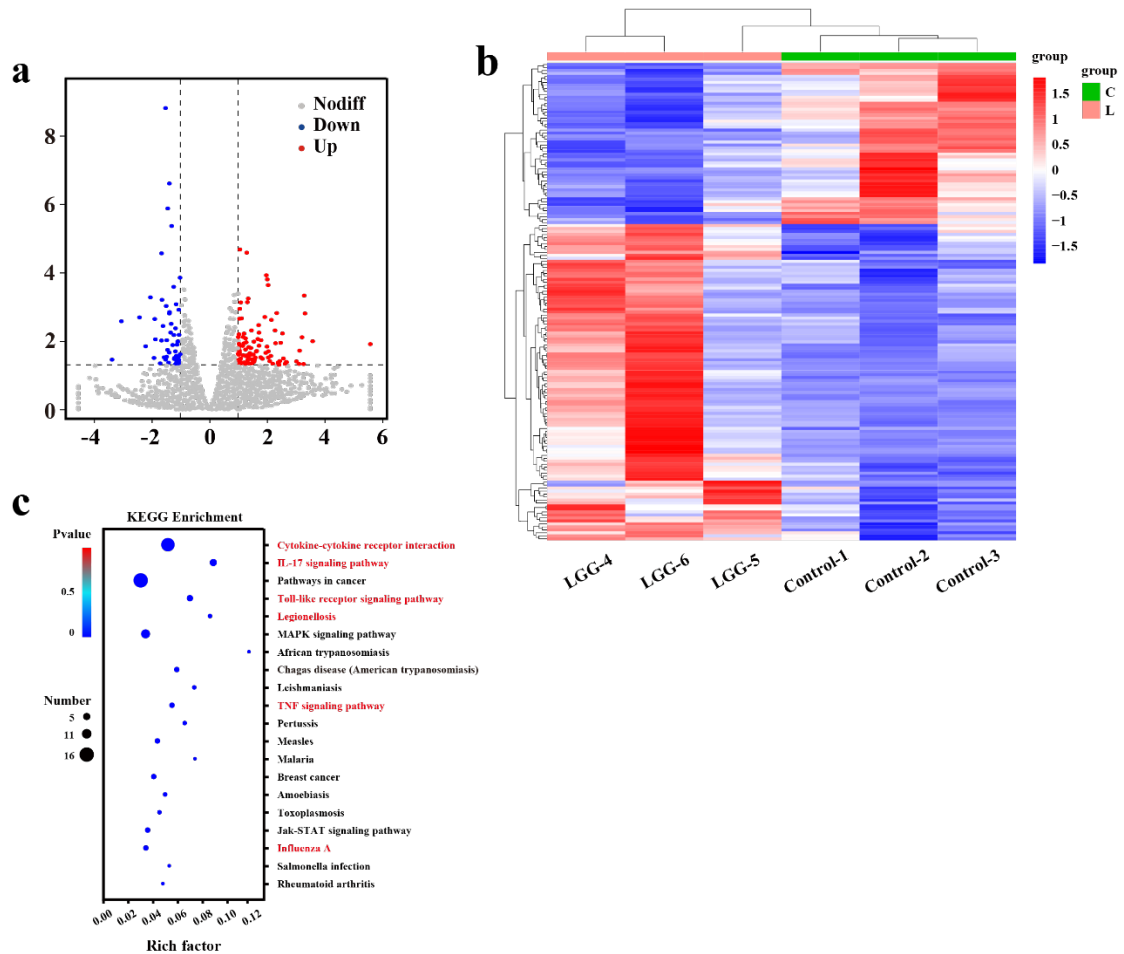

**Fig. 5 Bacterial hypoxia targeting characterization and bacterial sequencing.** (a) Volcano map and (b) Heatmap of genes alteration with or without LGG treatment ( $P < 0.05$ ,  $|\text{fold change}| \geq 2$ ). (c) RNAseq-based KEGG analysis of differential gene expression profiles after LGG treatment.

## Reference

1. Deng H, *et al.* Large-pore apertures in a series of metal-organic frameworks. *Science* **336**, 1018-1023 (2012).
2. Lykourinou V, *et al.* Immobilization of mp-11 into a mesoporous metal-organic framework, mp-11@mesomof: A new platform for enzymatic catalysis. *J Am Chem Soc* **133**, 10382-10385 (2011).
3. Mensinger ZL, *et al.* Adsorption of amyloid beta peptide by metal-organic frameworks. *ACS Omega* **5**, 32969-32974 (2020).
4. Kundu T, *et al.* Mechanical downsizing of a gadolinium(iii)-based metal-organic framework for anticancer drug delivery. *Chemistry* **20**, 10514-10518 (2014).
5. Doonan C, *et al.* Metal-organic frameworks at the biointerface: Synthetic strategies and applications. *Acc Chem Res* **50**, 1423-1432 (2017).
6. Vasconcelos IB, *et al.* Cytotoxicity and slow release of the anti-cancer drug doxorubicin from zif-8. *RSC Advances* **2**, (2012).
7. Zhang Y, *et al.* Influence of the 2-methylimidazole/zinc nitrate hexahydrate molar ratio on the synthesis of zeolitic imidazolate framework-8 crystals at room temperature. *Sci Rep* **8**, 9597 (2018).
8. Liang K, *et al.* Biomimetic mineralization of metal-organic frameworks as protective coatings for biomacromolecules. *Nat Commun* **6**, 7240 (2015).

## REVIEWERS' COMMENTS

Reviewer #1 (Remarks to the Author):

The authors had addressed my comments

Reviewer #5 (Remarks to the Author):

The manuscript has been carefully revised with additional data and explanation. Based on their responsive letter, we still have some questions and suggestions. Please find the specific ones below. With appropriate point-by-point answer, the manuscript should be acceptable.

1. The authors have given a very detailed description about the interaction between different ingredients in MHS. The in-situ encapsulation of HMME in ZIF-8 is quite clear now, but the internalization of CRISPR/Cas9 is still not convincing. The authors mentions that the pores size of MH (3.3482 nm) is sufficient for the penetration of Cas9/sgRNA more than one time. According to previous study (10.1016/j.addr.2019.11.005), the size of CRISPR/Cas9 RNP complex (10 nm) is much bigger than that in MH.

2. In Fig. 3j, the actual editing efficiency of MHS should be less than 19.80% since the same editing sequence can be found in the control group. It's better to remove these data and calculate it again when doing the statistical editing efficiency. In addition, the IDO1 locus is hard to read in Supplementary Fig. 4a and please add higher resolution pictures.

### Reviewer #1 (Remarks to the Author)

*The authors had addressed my comments*

**Response:** We greatly appreciated your acknowledgement of this study.

### Reviewer #5 (Remarks to the Author)

*The manuscript has been carefully revised with additional data and explanation. Based on their responsive letter, we still have some questions and suggestions. Please find the specific ones below. With appropriate point-by-point answer, the manuscript should be acceptable.*

**Response:** Thank you for your positive comments and recommendations. Your concerns have been addressed point by point, please find the following detailed responses to comments and suggestions.

*1. The authors have given a very detailed description about the interaction between different ingredients in MHS. The in-situ encapsulation of HMME in ZIF-8 is quite clear now, but the internalization of CRISPR/Cas9 is still not convincing. The authors mentions that the pores size of MH (3.3482 nm) is sufficient for the penetration of Cas9/sgRNA more than one time. According to previous study (10.1016/j.addr.2019.11.005), the size of CRISPR/Cas9 RNP complex (10 nm) is much bigger than that in MH.*

**Response:** Thank you for your kind reminder, which helped us to improve the quality of our manuscript. Indeed, we measured an average pore size of 3.3482 nm for MH, which is smaller than the average size of the previously reported CRISPR/Cas9 RNP complex (10 nm). However, ZIF-8 has been shown to be a porous material with mesopores ranging from 2 to 50 nm (10.1038/ncomms8240), while the BET data in Supplementary Fig. 2c showed that MH has some mesopores larger than 10 nm. Both the mesopore and the total pore volume of MH decreased after loading RNP (**Fig. 2b of Manuscript**), suggesting that some CRISPR/Cas9 is internalized into mesopores larger than 10 nm. However, due to the small number of mesopores (>10nm), all the
